# Supplementary material for: Next Generation Plasma Proteomics Identifies High-Precision Biomarker Candidates for Ovarian Cancer
Source: Cancers (Basel). 2022 Mar 30;14(7):1757. doi: 10.3390/cancers14071757 (PMC8997113; doi:10.3390/cancers14071757)
Supplement: Supplementary file 1 [file cancers-14-01757-s001.zip › Gyllensten_SupplementaryTables_220330.xlsx]

## Sheet: Table S1
Supplementary Table S1. Results from univariate analysis.
Columns starting with "d" are result from the Discovery cohort and starting with "r" from the Replication cohort.
"mCtlr" is the mean concentration among controls, "mCase" among cases. "mCtrlCase" is the difference; "mCtrl" - "mCase"
"pval" is the raw p-value from a two-sided wilcoxon ranked sum test.
"ccDokBonf" (1/0) a 1 indicates if the results are univariate significant (bonferroni adjusted p-value) in the discovery cohort
"ccRokBonf" (1/0) a 1 indicates if the results are univariate significant (bonferroni adjusted p-value) in the replication cohort
"TCGA_fav" or "TCGA_unfav", if there is a number here, then high expression of the corresponding gene is associated (number is p-value) with favourable ("_fav") or unfavourable ("_unfav") outcome in the TCGA databases.
proteinShortName	uniprotID	exploreSubPanel	d_mCtrl	d_mCase	d_mCtrlCase	d_pval	r_mCtrl	r_mCase	r_mCtrlCase	r_pval	ccDokBonf	ccRokBonf	TCGA_fav	TCGA_unfav
WFDC2	Q14508	ONC	1.24034	3.40063	-2.16029	2.79041e-13	0.482531	3.38063	-2.8981	3.92986e-09	1	1
KRT19	P08727	INF	1.12509	4.15037	-3.02528	2.20719e-12	0.510437	3.23828	-2.72784	9.49113e-07	1	1
FOLR1	P15328	ONC	1.04379	2.87519	-1.8314	1.70921e-10	0.555117	2.28378	-1.72866	3.94427e-05	1	1
DPY30	Q9C005	ONC	1.6269	3.43544	-1.80854	4.5891e-10	0.858314	2.68753	-1.82922	5.27435e-05	1	1
SPINT1	O43278	NEU	1.02193	2.10828	-1.08635	7.51811e-10	0.424492	1.82599	-1.40149	1.12361e-06	1	1
GRPEL1	Q9HAV7	ONC	1.12244	3.09067	-1.96823	1.11029e-09	0.563712	2.54143	-1.97772	3.71989e-05	1	1
MAD1L1	Q9Y6D9	NEU	1.9682	3.55118	-1.58298	1.26002e-09	0.676864	2.69642	-2.01955	1.70876e-05	1	1
PRSS8	Q16651	INF	0.601695	1.72947	-1.12777	5.01566e-09	-0.126888	1.10252	-1.22941	1.17466e-05	1	1
VTCN1	Q7Z7D3	ONC	0.686919	2.45743	-1.77051	7.30791e-09	0.3817	1.46096	-1.07926	0.0145843	1	0
MSLN	Q13421	ONC	0.511918	1.93733	-1.42542	7.99105e-09	-0.102238	1.14638	-1.24861	0.000201215	1	1
CCL7	P80098	INF	2.04408	3.46774	-1.42366	2.04856e-08	0.204185	1.6127	-1.40852	5.48183e-06	1	1
PTS	Q03393	NEU	1.30558	2.89359	-1.58802	2.20778e-08	0.352194	1.68661	-1.33441	8.94693e-05	1	1
BRK1	Q8WUW1	NEU	1.20281	2.88586	-1.68305	3.20819e-08	0.528585	2.19772	-1.66914	7.28394e-06	1	1
KRT18	P05783	ONC	0.266756	1.89513	-1.62838	5.60072e-08	-0.302238	1.23769	-1.53993	5.35929e-07	1	1
MUC16	Q8WXI7	ONC	3.08304	4.36189	-1.27885	7.56974e-08	2.10923	4.30639	-2.19715	2.96126e-06	1	1
SPP1	P10451	CAR	0.565965	1.74578	-1.17981	9.94114e-08	0.437332	1.87288	-1.43555	5.6233e-06	1	1
RRM2	P31350	ONC	1.10095	2.46113	-1.36018	1.27209e-07	-0.681677	0.740707	-1.42238	9.36371e-06	1	1
ZBTB17	Q13105	CAR	1.12228	2.15176	-1.02949	1.33994e-07	0.382699	1.37124	-0.988536	1.80755e-06	1	1
MDK	P21741	ONC	1.74447	3.00012	-1.25565	1.41469e-07	1.57774	3.21692	-1.63919	1.43702e-06	1	1
CDCP1	Q9H5V8	NEU	1.64006	2.68366	-1.0436	1.79283e-07	0.656896	2.03724	-1.38034	1.00098e-08	1	1
KLK6	Q92876	ONC	1.06756	2.10661	-1.03905	1.91685e-07	0.44545	1.95791	-1.51245	1.12361e-06	1	1
PAEP	P09466	NEU	3.06346	5.45394	-2.39048	1.94643e-07	3.33367	5.35721	-2.02353	0.0116662	1	0
SPON1	Q9HCB6	INF	1.39241	2.46492	-1.07251	2.698e-07	0.59047	1.89178	-1.30131	0.000295705	1	1
NECTIN4	Q96NY8	ONC	0.865922	1.90469	-1.03877	2.79018e-07	0.306838	1.38759	-1.08076	0.00124638	1	1
KLK10	O43240	ONC	1.52382	2.91765	-1.39384	5.41876e-07	0.802122	2.34906	-1.54693	0.000128323	1	1
TREM2	Q9NZC2	INF	1.78768	2.79952	-1.01183	5.92085e-07	0.768341	2.02779	-1.25945	4.16029e-05	1	1
PSIP1	O75475	INF	1.95274	3.50995	-1.55721	8.42639e-07	0.521771	1.93341	-1.41164	0.000156468	1	1
TACSTD2	P09758	ONC	1.2623	2.2957	-1.0334	2.13968e-06	0.653683	1.55571	-0.902022	0.00859171	1	0
METAP1D	Q6UB28	INF	1.34367	2.37905	-1.03538	5.11258e-06	2.70075	3.67452	-0.973773	0.00285623	1	0
IL6	P05231	ONC	2.14897	3.44222	-1.29324	1.09146e-05	1.68108	3.34388	-1.6628	0.000851341	1	1
IFNL1	Q8IU54	NEU	0.549844	1.78623	-1.23639	2.29723e-05	0.259143	1.59646	-1.33731	0.000125445	1	1
CXCL9	Q07325	INF	0.819189	1.82247	-1.00328	3.34819e-05	0.58056	1.82403	-1.24347	0.000481871	1	1	0.000806
CDH6	P55285	CAR	1.03703	1.9748	-0.937768	3.57288e-10	0.411572	1.20462	-0.793048	0.00453947	0	0
SEZ6L2	Q6UXD5	ONC	1.56265	2.176	-0.613351	2.66637e-09	1.03994	1.73193	-0.691989	0.000201215	0	0
JUN	P05412	INF	0.315379	1.19336	-0.87798	1.15893e-08	-0.0956037	0.670727	-0.766331	0.000877572	0	0
HMOX2	P30519	NEU	1.49711	2.40953	-0.912416	1.19229e-08	1.26162	1.73919	-0.477568	0.0142048	0	0
BAIAP2	Q9UQB8	ONC	0.547625	1.51302	-0.965391	1.49743e-08	0.423439	1.33709	-0.913648	0.00261325	0	0
GFER	P55789	ONC	-0.00191271	0.8589	-0.860813	3.66699e-08	0.619028	1.47779	-0.858765	0.00336354	0	0
BCAM	P50895	NEU	0.912555	1.735	-0.822442	4.19898e-08	0.334619	1.24336	-0.908737	4.53178e-06	0	0
DCTPP1	Q9H773	CAR	1.27776	2.11436	-0.836603	5.28011e-08	0.447833	1.18277	-0.734939	0.000845823	0	0
KLK11	Q9UBX7	ONC	0.835986	1.8117	-0.975715	5.36834e-08	0.373098	1.25257	-0.879469	9.28233e-05	0	0
CKAP4	Q07065	INF	1.70828	2.6475	-0.939215	1.40422e-07	0.960828	2.00362	-1.04279	4.39618e-05	0	0
DDR1	Q08345	NEU	1.21201	1.93473	-0.722725	1.51636e-07	0.55095	1.47586	-0.924907	6.74954e-07	0	0
SPON2	Q9BUD6	CAR	1.56337	2.04772	-0.484355	3.8465e-07	0.163487	0.816165	-0.652678	0.00850635	0	0
ANGPTL2	Q9UKU9	INF	0.929978	1.69266	-0.762682	4.16816e-07	0.378526	1.43092	-1.05239	1.62293e-06	0	0
GPKOW	Q92917	NEU	0.788104	1.66863	-0.880524	4.44509e-07	-0.335585	0.49902	-0.834605	7.52375e-05	0	0
IGSF8	Q969P0	CAR	1.15058	1.63845	-0.487874	4.57779e-07	0.770845	1.41957	-0.648721	0.000109279	0	0
CXCL1	P09341	INF	3.97638	4.83931	-0.862933	6.15466e-07	2.60473	3.31545	-0.710726	0.0314859	0	0
RCOR1	Q9UKL0	CAR	0.33533	1.06666	-0.731331	7.19679e-07	-0.111407	0.354984	-0.466391	0.00447691	0	0
CTSL	P07711	CAR	1.12224	1.56906	-0.446815	8.49326e-07	0.603416	1.29228	-0.688866	0.000102982	0	0
CLEC5A	Q9NY25	CAR	1.54271	2.23375	-0.691042	1.04041e-06	0.716435	1.5255	-0.809067	4.70666e-05	0	0		0.000221
TNFRSF8	P28908	NEU	1.17089	1.9308	-0.759915	1.21112e-06	0.633942	1.78952	-1.15558	6.9457e-06	0	0
PODXL	O00592	ONC	0.410296	0.652816	-0.24252	1.43445e-06	0.213529	0.58856	-0.375031	0.00163503	0	0
LTBP2	Q14767	CAR	1.44051	2.18781	-0.747298	1.9915e-06	0.71784	1.78274	-1.0649	0.000564523	0	0
POLR2F	P61218	ONC	1.07353	1.75326	-0.67973	2.93953e-06	-0.049117	0.84797	-0.897087	0.000169045	0	0
TRIAP1	O43715	ONC	1.01343	1.67642	-0.662993	4.32127e-06	1.62627	2.767	-1.14073	0.000106082	0	0
NECTIN2	Q92692	CAR	1.44743	1.91405	-0.46662	4.39713e-06	1.10237	1.79305	-0.69068	0.000150327	0	0
DDAH1	O94760	ONC	1.0152	1.53421	-0.519007	5.62589e-06	0.684038	1.40407	-0.720031	0.000238816	0	0
PRDX3	P30048	INF	1.24908	2.24649	-0.997412	5.75875e-06	2.38786	3.42289	-1.03503	0.00336354	0	0
C4BPB	P20851	ONC	1.05922	1.67478	-0.615559	7.0594e-06	0.591373	1.02387	-0.432493	0.0332712	0	0
AHCY	P23526	CAR	1.67042	2.33614	-0.665716	7.74381e-06	1.98013	2.62912	-0.648986	0.000845823	0	0
TNFRSF10B	O14763	NEU	1.39531	2.05391	-0.658599	1.09624e-05	0.790992	1.58343	-0.792442	5.27435e-05	0	0
LRIG1	Q96JA1	ONC	1.32856	1.93839	-0.609828	1.1757e-05	0.378128	1.36148	-0.983351	0.000147934	0	0
KIRREL2	Q6UWL6	NEU	1.76933	2.46778	-0.698447	1.2756e-05	1.37345	2.04135	-0.667895	0.00559768	0	0
DCBLD2	Q96PD2	ONC	1.67528	2.27057	-0.595283	1.35131e-05	0.549293	1.57928	-1.02998	3.94427e-05	0	0
AIFM1	O95831	ONC	0.753225	1.45897	-0.705746	1.48633e-05	1.53629	2.91723	-1.38094	0.000851341	0	0
BST2	Q10589	NEU	1.3887	2.2249	-0.836206	1.63346e-05	1.13864	1.76169	-0.62305	0.00453947	0	0
STC1	P52823	NEU	0.695001	1.3436	-0.648603	1.68139e-05	0.480961	1.39899	-0.918032	0.00100755	0	0
SOD2	P04179	NEU	1.22104	1.88455	-0.66351	1.74308e-05	0.731447	1.74087	-1.00943	2.27906e-05	0	0
TNFRSF4	P43489	INF	0.980312	1.47693	-0.496621	1.79563e-05	0.45727	1.17984	-0.722566	0.000888406	0	0
KLK8	O60259	ONC	0.654416	1.33437	-0.679951	1.82727e-05	0.040313	0.802999	-0.762686	0.00258362	0	0
EZR	P15311	NEU	0.962291	1.31011	-0.347821	1.83333e-05	0.748506	1.30054	-0.55203	0.00290082	0	0
ST6GAL1	P15907	CAR	2.6324	3.17024	-0.537839	2.05363e-05	1.06964	1.82818	-0.75854	0.000491451	0	0
CANT1	Q8WVQ1	CAR	1.36798	1.67368	-0.305707	2.10905e-05	0.478895	0.942993	-0.464098	0.000109279	0	0
CD14	P08571	CAR	2.20165	2.88932	-0.687673	2.11434e-05	1.31391	2.38844	-1.07453	0.000758161	0	0
TNFRSF11B	O00300	INF	1.19089	1.66702	-0.476133	2.21614e-05	0.481124	1.27462	-0.793491	0.000181467	0	0
IGFBP2	P18065	CAR	2.25859	2.88624	-0.627648	2.24091e-05	1.33061	2.5481	-1.21749	0.000238273	0	0
GFRA1	P56159	ONC	1.38271	1.85338	-0.470678	2.32962e-05	0.445946	1.60779	-1.16185	3.71467e-06	0	0
ENO1	P06733	NEU	2.53671	3.24793	-0.71122	2.51012e-05	2.20245	3.51543	-1.31298	9.28233e-05	0	0
FUS	P35637	ONC	0.76564	1.20299	-0.437345	2.6708e-05	0.51129	1.13681	-0.625515	0.000107102	0	0
RARRES1	P49788	ONC	0.541452	0.96508	-0.423628	2.6708e-05	0.077209	0.616791	-0.539582	0.00134262	0	0
SETMAR	Q53H47	NEU	1.0736	1.52999	-0.456397	2.86343e-05	0.272834	0.786437	-0.513603	0.00171507	0	0
ITIH3	Q06033	CAR	1.61053	2.02119	-0.410665	3.16551e-05	1.25105	1.82021	-0.569159	0.00224541	0	0
TNFRSF1A	P19438	NEU	1.18298	1.64054	-0.457562	3.22394e-05	0.461476	1.36184	-0.900368	4.70666e-05	0	0
TFPI2	P48307	ONC	1.45011	2.02744	-0.577334	3.45441e-05	1.03001	1.95678	-0.926768	1.88637e-05	0	0
CXCL8	P10145	CAR	2.62636	3.40353	-0.77717	3.47095e-05	1.16866	2.30066	-1.132	9.28233e-05	0	0
SIGLEC10	Q96LC7	INF	1.05822	1.53022	-0.471998	4.28065e-05	0.519871	1.1688	-0.648928	3.16836e-06	0	0
IL6	P05231	INF	2.31446	3.61767	-1.30321	4.4296e-05	1.7833	3.70782	-1.92452	0.000271743	0	0
MPHOSPH8	Q99549	CAR	1.18173	1.76625	-0.584514	4.61203e-05	0.996996	1.65755	-0.660556	0.00124232	0	0
CDH2	P19022	CAR	1.45895	1.93489	-0.475937	4.62646e-05	0.337961	1.42112	-1.08316	1.22153e-07	0	0
ENO2	P09104	NEU	1.62217	2.27067	-0.648495	4.63905e-05	2.27759	3.32354	-1.04595	0.000150327	0	0
GOLM2	Q6P4E1	NEU	1.20441	1.57403	-0.36962	4.90084e-05	0.828688	1.3861	-0.557415	0.00141333	0	0
PSME2	Q9UL46	NEU	1.19351	1.75594	-0.562431	5.18768e-05	1.7151	2.66717	-0.952065	1.08579e-06	0	0
SLC39A14	Q15043	NEU	1.61376	2.02383	-0.410073	5.38505e-05	1.03323	1.56594	-0.53271	0.038165	0	0
DSG2	Q14126	NEU	1.31624	1.74752	-0.431281	6.02113e-05	0.331402	0.774591	-0.443189	0.00141333	0	0
DSC2	Q02487	NEU	1.57073	2.06077	-0.490034	6.19157e-05	0.891987	1.56182	-0.66983	0.000276572	0	0
NUDC	Q9Y266	INF	1.78692	2.29294	-0.506018	6.19157e-05	2.44622	3.22675	-0.780529	0.00077438	0	0
TNF	P01375	INF	1.62686	2.1056	-0.47874	6.2553e-05	0.871709	1.70982	-0.838113	1.82248e-05	0	0
TNF	P01375	CAR	1.02881	1.49845	-0.469637	6.65557e-05	0.418061	1.15945	-0.74139	1.08579e-06	0	0
TNFRSF1B	P20333	NEU	1.10089	1.57738	-0.476485	7.11456e-05	0.504856	1.29356	-0.7887	2.27906e-05	0	0
EPHA2	P29317	ONC	1.21698	1.66311	-0.446132	7.30411e-05	0.389885	0.998598	-0.608713	0.00151465	0	0
PTK7	Q13308	NEU	1.45181	2.14219	-0.690382	7.59746e-05	0.873033	1.63001	-0.756979	0.00132582	0	0
CXCL8	P10145	NEU	3.49795	4.28048	-0.782536	7.63317e-05	1.58014	2.92348	-1.34334	4.39618e-05	0	0
IL2RA	P01589	CAR	1.33727	1.88914	-0.551869	7.72836e-05	0.774845	1.8842	-1.10935	1.82608e-06	0	0
THBS2	P35442	NEU	1.38399	1.86142	-0.477433	7.7293e-05	0.993988	1.41599	-0.422004	0.00850635	0	0
IL6	P05231	NEU	2.44554	3.69492	-1.24937	7.88001e-05	2.08109	3.86436	-1.78327	0.000278966	0	0
VSIG4	Q9Y279	NEU	1.47611	2.20869	-0.732576	8.16667e-05	0.931923	2.03688	-1.10495	0.000150327	0	0
PLAUR	Q03405	INF	1.3748	1.84087	-0.466072	8.18509e-05	0.333642	1.23585	-0.902204	0.000107102	0	0
LILRB4	Q8NHJ6	INF	1.38286	2.03279	-0.649925	8.51961e-05	1.62904	2.64376	-1.01471	0.000299379	0	0
PTPRF	P10586	CAR	1.34228	1.83764	-0.495361	8.61542e-05	0.583	1.29281	-0.709811	0.000320319	0	0
NID1	P14543	CAR	1.74189	2.20599	-0.464108	8.85177e-05	0.288923	1.14352	-0.854597	5.06307e-05	0	0
ADAMTS15	Q8TE58	ONC	-0.972577	-0.324437	-0.64814	8.89542e-05	0.0655964	1.3744	-1.3088	0.000118189	0	0
TYMP	P19971	CAR	1.53154	2.20082	-0.669287	9.18907e-05	1.75117	2.73158	-0.980403	0.000740571	0	0
IL10RB	Q08334	INF	1.06524	1.45397	-0.388729	9.26829e-05	0.378317	0.990882	-0.612565	0.000877572	0	0
IL1R1	P14778	NEU	1.39265	1.68156	-0.288917	9.36467e-05	0.913829	1.45521	-0.541385	6.9457e-06	0	0
CSF1	P09603	INF	1.26354	1.7165	-0.452963	9.55951e-05	0.563265	1.41433	-0.851062	0.000152691	0	0
CXCL8	P10145	ONC	2.87287	3.63983	-0.766962	0.000107511	0.939323	2.39946	-1.46014	1.68138e-05	0	0
IL12B	P29460	INF	0.718652	1.28937	-0.570715	0.000116325	0.376911	0.849556	-0.472645	0.0271228	0	0
TNF	P01375	ONC	1.08928	1.50259	-0.413311	0.000119136	0.422293	1.16697	-0.744673	3.57506e-06	0	0
CXCL6	P80162	INF	3.99396	4.49343	-0.499471	0.0001195	2.31028	3.17809	-0.867811	0.000278966	0	0
EFNA1	P20827	NEU	1.14886	1.53726	-0.388394	0.000129519	0.610464	1.29068	-0.680212	0.000128323	0	0
LTBP3	Q9NS15	ONC	1.39793	1.9723	-0.574375	0.000133007	0.946394	1.87118	-0.924788	0.00116777	0	0
TNFRSF10A	O00220	NEU	1.52209	1.96918	-0.447089	0.000142753	1.0867	1.60291	-0.51621	0.032253	0	0
TNFRSF9	Q07011	NEU	0.951897	1.49751	-0.545609	0.000142753	0.395613	1.05677	-0.661156	0.00194531	0	0
CD300E	Q496F6	ONC	1.22186	1.71735	-0.495497	0.000150384	0.447672	1.36959	-0.921921	7.52375e-05	0	0
TIMD4	Q96H15	CAR	1.33909	1.78298	-0.443885	0.000150804	0.988283	1.64506	-0.656779	0.00116777	0	0
KLK13	Q9UKR3	ONC	0.809436	1.43605	-0.626618	0.000172046	0.745672	1.23409	-0.488414	0.0329269	0	0
IL6	P05231	CAR	2.72941	3.94002	-1.21061	0.000174585	2.13336	4.02854	-1.89518	0.00032494	0	0
PODXL2	Q9NZ53	ONC	0.730159	1.10924	-0.379076	0.000177894	0.234796	0.842143	-0.607347	0.000964236	0	0
B4GALT1	P15291	INF	1.0133	1.36624	-0.352938	0.000180825	0.438378	0.98943	-0.551052	0.00484285	0	0
CXCL10	P02778	INF	2.0404	2.85186	-0.811467	0.000180825	0.908468	2.00415	-1.09568	8.92601e-05	0	0	1.12e-05
FBP1	P09467	CAR	1.27199	2.17797	-0.905975	0.000182758	1.94143	2.1455	-0.204077	0.551789	0	0
ERBB4	Q15303	ONC	0.897801	1.56578	-0.667975	0.000182934	0.270096	0.667866	-0.39777	0.0494126	0	0
F2R	P25116	INF	-1.12603	-0.815492	-0.310537	0.000191907	1.58834	2.45405	-0.865715	0.00296763	0	0
CA6	P23280	NEU	0.0605196	-0.69397	0.75449	0.000197746	-0.648897	-1.42445	0.775558	0.00850635	0	0
TIMP1	P01033	CAR	1.98518	2.45017	-0.464989	0.000200765	0.671904	1.5903	-0.9184	4.58703e-06	0	0
SDC1	P18827	CAR	1.16733	1.76897	-0.601645	0.000208467	0.426886	1.5033	-1.07641	9.28233e-05	0	0
CCL3	P10147	INF	1.79461	2.35109	-0.556479	0.000213193	0.380049	1.28025	-0.900205	1.90939e-05	0	0
ANGPTL3	Q9Y5C1	CAR	1.27866	1.6879	-0.409233	0.000246456	0.592129	1.24094	-0.648816	3.406e-05	0	0
TNF	P01375	NEU	1.64618	2.06719	-0.421015	0.000256971	0.927792	1.67185	-0.744057	9.03617e-06	0	0
PRDX1	Q06830	NEU	1.55982	2.0617	-0.501888	0.000261158	2.30887	3.00859	-0.699714	0.00399419	0	0
LPCAT2	Q7L5N7	ONC	1.26378	1.72581	-0.46203	0.000263403	-0.213232	0.179463	-0.392695	0.00227957	0	0
TXLNA	P40222	NEU	2.61177	3.19796	-0.586182	0.00026901	3.28122	4.76202	-1.4808	4.39618e-05	0	0
COX5B	P10606	ONC	0.510176	0.837944	-0.327769	0.0002704	1.46775	2.63385	-1.1661	0.000460505	0	0
CALB2	P22676	NEU	1.208	1.82834	-0.620342	0.000273793	0.189162	0.640834	-0.451671	0.00859171	0	0
SEMA3F	Q13275	CAR	0.763465	1.12397	-0.360502	0.000292101	0.251246	0.779814	-0.528568	0.000175675	0	0
HTRA2	O43464	ONC	0.994712	1.52354	-0.528825	0.000300055	1.45934	2.09083	-0.631489	0.00768782	0	0
FURIN	P09958	ONC	1.18167	1.64981	-0.468139	0.000300055	0.207408	1.04515	-0.837741	0.000571058	0	0
LGALS9	O00182	INF	0.834462	1.29233	-0.457872	0.000306508	0.222182	1.00546	-0.783279	0.000215043	0	0
SF3B4	Q15427	ONC	1.64365	2.19185	-0.548201	0.000316256	1.92939	3.58684	-1.65745	5.54938e-05	0	0
AGRN	O00468	INF	1.48129	2.18767	-0.706375	0.000358893	0.385738	1.38274	-0.997007	8.92601e-05	0	0
TNFRSF12A	Q9NP84	ONC	1.01421	1.53179	-0.517572	0.000362249	0.1646	0.907	-0.7424	0.00229749	0	0
SORT1	Q99523	CAR	2.16645	2.53744	-0.370991	0.000367417	0.599523	1.27936	-0.679841	0.000370211	0	0
ADAM8	P78325	NEU	1.35167	1.74163	-0.389955	0.000378301	0.189166	0.75534	-0.566174	0.000204831	0	0
ELOA	Q14241	ONC	1.95945	2.61863	-0.659186	0.000388759	-0.00742054	1.1635	-1.17092	7.29898e-07	0	0
HAVCR2	Q8TDQ0	NEU	1.14058	1.67035	-0.52977	0.000394312	0.564784	1.51929	-0.954505	1.88637e-05	0	0
CD79B	P40259	INF	1.22915	1.67661	-0.447463	0.000394312	0.660387	1.5118	-0.851412	0.00150931	0	0
ALPP	P05187	ONC	2.45144	3.99416	-1.54272	0.000430578	1.05077	2.88572	-1.83495	0.00199343	0	0
TDRKH	Q9Y2W6	NEU	1.37325	1.83563	-0.462379	0.000464624	1.29519	2.06123	-0.76604	0.00194531	0	0
PPP3R1	P63098	NEU	0.529085	0.908736	-0.379651	0.000467399	0.792987	1.45594	-0.662958	0.00171507	0	0
COL18A1	P39060	CAR	1.21084	1.45776	-0.246915	0.000483109	0.629793	1.13181	-0.50202	5.60084e-05	0	0
AMBP	P02760	ONC	0.737494	0.945083	-0.207588	0.000487103	0.49755	0.771877	-0.274327	0.0116662	0	0
PREB	Q9HCU5	INF	0.241218	0.569316	-0.328098	0.00048802	0.23291	0.560397	-0.327486	0.148589	0	0
RARRES2	Q99969	CAR	2.26435	2.81135	-0.547002	0.000489018	0.694583	1.61799	-0.923409	0.000128076	0	0
TST	Q16762	NEU	0.565564	1.0018	-0.436232	0.000493861	1.19231	1.87359	-0.681279	0.00447691	0	0
C19orf12	Q9NSK7	NEU	0.77573	1.6602	-0.884473	0.000540949	-0.285471	0.248776	-0.534247	0.0271228	0	0
RNASET2	O00584	CAR	1.39085	1.71913	-0.328281	0.000545468	0.68969	1.10888	-0.419189	0.000426973	0	0
CNTN1	Q12860	CAR	1.3643	0.942353	0.421948	0.000545485	0.610025	0.221555	0.38847	0.0306375	0	0
DDC	P20711	CAR	1.31587	0.807553	0.508321	0.000547843	0.930855	0.155301	0.775555	0.0182253	0	0
PRDX5	P30044	INF	3.49523	3.97353	-0.478308	0.000571137	3.89379	4.74927	-0.855481	0.00500993	0	0
GSTP1	P09211	NEU	0.99582	1.40968	-0.413856	0.00057463	0.951046	1.26647	-0.315428	0.0295953	0	0
ADAMTS16	Q8TE57	CAR	1.09372	1.62377	-0.530045	0.000582169	0.520828	1.31776	-0.796936	8.94693e-05	0	0
ADM	P35318	ONC	-0.0257125	0.59359	-0.619303	0.000582564	0.753088	1.24548	-0.492391	0.00150931	0	0
FKBP4	Q02790	NEU	2.01504	2.48884	-0.473798	0.000603032	1.87732	2.90316	-1.02584	2.31173e-06	0	0
PLA2G2A	P14555	CAR	1.30726	2.03386	-0.726594	0.000645485	2.04679	2.50139	-0.454601	0.13003	0	0
CNDP1	Q96KN2	CAR	0.277351	-0.0335841	0.310935	0.000645485	-2.01857	-2.66516	0.646588	0.00201446	0	0
TNFRSF6B	O95407	NEU	1.90469	2.64984	-0.745157	0.000655839	0.375195	1.74095	-1.36576	5.8478e-06	0	0
ULBP2	Q9BZM5	NEU	1.34473	1.82168	-0.476948	0.000655839	0.59298	1.33515	-0.742173	0.000204157	0	0
COLEC12	Q5KU26	INF	1.0419	1.38564	-0.343745	0.000691875	0.475891	0.99899	-0.523099	0.00957143	0	0
CD302	Q8IX05	ONC	0.788352	1.10161	-0.313257	0.000727958	0.294021	0.849972	-0.555951	0.0166852	0	0
ACP5	P13686	CAR	0.797919	1.14698	-0.349065	0.000744507	0.341073	0.878153	-0.53708	0.000845823	0	0
P29460/IL12A	P29459	ONC	1.07064	1.77049	-0.699849	0.000764535	0.474929	1.08939	-0.614463	0.0300138	0	0
IL17C	Q9P0M4	INF	0.160803	1.20713	-1.04633	0.000766945	-0.45226	0.834994	-1.28725	0.00611947	0	0
CDH17	Q12864	CAR	1.92204	1.22858	0.69346	0.000779626	1.00542	0.2593	0.746116	0.0360904	0	0
BLMH	Q13867	CAR	0.756376	1.07999	-0.323615	0.000780533	0.533604	1.16835	-0.634745	0.000370211	0	0
NUDT5	Q9UKK9	NEU	1.08442	1.49166	-0.40724	0.000800395	1.08057	1.83816	-0.757588	0.000426973	0	0
EIF4G1	Q04637	INF	3.6548	4.50394	-0.849144	0.000809956	4.0096	5.57545	-1.56585	0.00220257	0	0
SSC5D	A1L4H1	CAR	0.784448	1.21982	-0.435372	0.000837615	0.0982463	0.951171	-0.852924	7.42107e-06	0	0
FXYD5	Q96DB9	INF	0.939997	1.19579	-0.255789	0.000888869	1.43804	2.36417	-0.926128	0.000412258	0	0
CD40	P25942	INF	1.52436	1.88882	-0.364462	0.000918942	1.16989	1.96147	-0.791581	0.00134262	0	0
CRHBP	P24387	INF	1.0151	1.37819	-0.363086	0.000931347	0.46312	0.89361	-0.43049	0.00429664	0	0
CEP20	Q96NB1	ONC	0.725411	1.18825	-0.462844	0.000991669	1.06235	1.80306	-0.740707	0.0145843	0	0
DTX3	Q8N9I9	ONC	1.0018	1.35419	-0.352391	0.00104704	0.352764	0.91544	-0.562676	0.00381982	0	0
MLN	P12872	INF	1.4719	2.33439	-0.862495	0.00105953	0.660821	2.6057	-1.94488	3.01902e-05	0	0
ENTPD2	Q9Y5L3	ONC	0.857164	1.34829	-0.491127	0.00106573	0.434493	0.683506	-0.249013	0.203473	0	0
TXNRD1	Q16881	NEU	1.43745	1.79047	-0.353011	0.00108714	1.39026	2.30479	-0.914532	4.70666e-05	0	0
S100A11	P31949	CAR	1.58749	2.0457	-0.458209	0.00109992	0.337341	0.924103	-0.586761	0.00159986	0	0
CDHR5	Q9HBB8	CAR	0.649432	0.964033	-0.314602	0.00112597	0.806952	0.850295	-0.0433432	0.865038	0	0
CCDC80	Q76M96	CAR	1.48121	2.11181	-0.630601	0.00112597	0.481923	1.59107	-1.10915	3.94427e-05	0	0
HGF	P14210	INF	2.49692	2.90835	-0.411428	0.00116557	0.625971	1.72866	-1.10269	2.93707e-06	0	0
TARBP2	Q15633	NEU	2.47932	2.99116	-0.511839	0.00123177	2.28642	3.38081	-1.09439	0.00116241	0	0
GDF15	Q99988	CAR	1.21383	1.74276	-0.528924	0.00126968	0.477638	1.56151	-1.08387	0.000370211	0	0
KYNU	Q16719	INF	0.526827	1.03617	-0.509344	0.00127836	-0.155811	0.587251	-0.743062	0.000437826	0	0
TMSB10	P63313	NEU	2.93316	3.53629	-0.603133	0.00130808	2.76349	4.43087	-1.66738	1.88637e-05	0	0
CCL23	P55773	INF	1.68429	2.19149	-0.507197	0.00131253	0.65593	1.87228	-1.21635	3.57506e-06	0	0
MSTN	O14793	CAR	1.1868	0.590004	0.596794	0.00131558	0.337481	-0.122303	0.459784	0.088596	0	0
P4HB	P07237	ONC	1.03914	1.33679	-0.297652	0.00136724	0.787754	1.39182	-0.604067	0.000564523	0	0
GAL	P22466	INF	1.52604	0.950425	0.575616	0.00138253	0.123007	0.2772	-0.154193	0.771659	0	0
SERPINB8	P50452	INF	1.14494	1.60191	-0.45697	0.00140112	-0.165963	0.634648	-0.800611	0.00077438	0	0
HNMT	P50135	NEU	1.11841	1.62553	-0.507124	0.00140217	0.303727	1.01808	-0.714358	0.00773632	0	0
ENAH	Q8N8S7	INF	1.22068	1.86343	-0.642751	0.00145072	0.588904	1.33234	-0.743436	0.00429664	0	0
LIF	P15018	NEU	0.0857177	0.514468	-0.42875	0.00146	-0.210523	0.320845	-0.531368	0.0035578	0	0
ATOX1	O00244	ONC	2.19266	2.70528	-0.512617	0.00150651	2.42578	3.35541	-0.929628	0.00141333	0	0
RBKS	Q9H477	NEU	1.75655	2.18791	-0.431363	0.00159876	1.19095	2.16347	-0.972525	6.30925e-05	0	0
CCL18	P55774	CAR	1.71889	2.2986	-0.579708	0.0016268	0.713727	1.7796	-1.06587	0.000653433	0	0
ATXN10	Q9UBB4	NEU	-1.4301	-1.03707	-0.393029	0.00163315	-0.734603	0.180386	-0.91499	0.00316384	0	0
PSME1	Q06323	NEU	1.66681	2.07093	-0.404116	0.00164101	1.79828	2.75578	-0.957491	1.80755e-06	0	0
ESM1	Q9NQ30	INF	1.84937	2.30326	-0.453885	0.00169865	1.81314	2.18479	-0.37165	0.0727724	0	0
CLPP	Q16740	NEU	1.14718	1.49105	-0.34387	0.00172859	2.67127	3.29124	-0.619967	0.0414405	0	0
EFNA4	P52798	NEU	1.8049	2.19462	-0.389723	0.00172859	0.719678	1.36953	-0.649855	0.00101722	0	0
PAG1	Q9NWQ8	CAR	1.85035	2.40122	-0.550862	0.00186646	0.123228	1.04031	-0.917078	0.00032494	0	0
VEGFA	P15692	INF	3.00304	3.69027	-0.687226	0.00187907	1.2559	2.43329	-1.17738	5.27435e-05	0	0
SCARB2	Q14108	NEU	1.37319	1.69732	-0.324126	0.00191679	0.621974	1.30417	-0.682198	0.000278966	0	0
PAMR1	Q6UXH9	NEU	0.986041	1.29257	-0.306525	0.00192138	0.362631	0.894773	-0.532142	0.000276572	0	0
TNFRSF11A	Q9Y6Q6	INF	1.58005	1.98667	-0.406618	0.00192143	0.551764	1.22169	-0.669929	0.00624465	0	0
MCFD2	Q8NI22	CAR	1.39469	1.69123	-0.296537	0.00195072	1.37528	1.99392	-0.618644	0.000964236	0	0
MSMB	P08118	CAR	1.02573	0.459394	0.566339	0.00202947	-0.0163616	0.17787	-0.194232	0.72219	0	0
NCAM2	O15394	NEU	1.06882	0.795853	0.272967	0.00205383	0.439268	0.224695	0.214572	0.231232	0	0
CALB1	P05937	ONC	0.94143	1.44764	-0.506207	0.00210477	0.325989	0.971389	-0.645399	0.00381982	0	0
HBEGF	Q99075	ONC	2.66849	3.05893	-0.390438	0.00210498	0.139914	1.09391	-0.953995	0.00316384	0	0
TNFRSF21	O75509	NEU	1.34386	1.69203	-0.348177	0.00210625	0.823604	1.32366	-0.500054	0.000128323	0	0
CA14	Q9ULX7	ONC	0.623596	0.301226	0.32237	0.00220422	0.0991821	-0.349361	0.448544	0.00952765	0	0
CALCA	P01258	NEU	0.293939	0.851609	-0.55767	0.00226303	0.145902	0.866534	-0.720632	0.0248256	0	0
CSTB	P04080	CAR	1.49569	1.9475	-0.451803	0.0022634	0.972577	2.12597	-1.15339	2.90482e-06	0	0
IL17RB	Q9NRM6	INF	1.37468	1.78324	-0.408555	0.00227343	0.608524	1.34934	-0.740813	0.00285623	0	0
CNTNAP2	Q9UHC6	INF	2.66398	2.17702	0.486962	0.00227343	1.65454	1.5063	0.148243	0.548474	0	0
ARSB	P15848	ONC	3.05916	3.58604	-0.526878	0.00235573	0.677906	1.61129	-0.933386	0.000169045	0	0
LTBR	P36941	INF	0.949222	1.3028	-0.353575	0.00235671	0.358056	0.90231	-0.544254	0.00261325	0	0
LBP	P18428	CAR	1.51348	2.23346	-0.719975	0.0023637	0.67948	1.72018	-1.0407	0.000351772	0	0
NT5E	P21589	ONC	0.727934	1.31414	-0.586208	0.00236438	-0.97303	-0.671227	-0.301803	0.165499	0	0
ABL1	P00519	ONC	1.89446	2.33193	-0.437468	0.0024091	0.998848	1.90997	-0.911126	0.00260146	0	0
EPS8L2	Q9H6S3	ONC	0.605993	1.03667	-0.430675	0.00241556	0.19883	0.590092	-0.391262	0.038165	0	0
CD276	Q5ZPR3	INF	1.01157	1.33877	-0.327204	0.00241594	0.658499	1.3326	-0.674101	0.00154027	0	0
PDCD6	O75340	CAR	0.856856	1.26795	-0.411099	0.00243558	-0.262851	-0.00147362	-0.261377	0.0494126	0	0
NPDC1	Q9NQX5	CAR	1.22571	1.5771	-0.351391	0.00254489	0.612512	1.19683	-0.584317	0.00406784	0	0
MARCO	Q9UEW3	CAR	0.762338	1.00089	-0.238555	0.00254489	0.383719	0.92477	-0.541052	0.000276572	0	0
LCN2	P80188	CAR	0.939922	1.35583	-0.415908	0.0026325	0.246759	0.733719	-0.48696	0.000877572	0	0
SCLY	Q96I15	ONC	0.387302	0.922416	-0.535114	0.00264529	-0.0603679	0.323793	-0.384161	0.0767911	0	0
RELT	Q969Z4	NEU	1.47602	1.79948	-0.323466	0.00267142	0.40664	1.13265	-0.726006	5.60084e-05	0	0
CD163	Q86VB7	CAR	1.15685	1.52334	-0.366495	0.00268951	0.47445	1.31689	-0.84244	0.000412258	0	0		0.000727
ITGAV	P06756	ONC	0.454518	0.319579	0.134939	0.00276749	0.600501	0.332739	0.267762	0.0825275	0	0
LAIR1	Q6GTX8	INF	1.0768	1.48636	-0.409556	0.00280087	0.410063	1.18725	-0.777188	0.000351772	0	0
SMOC1	Q9H4F8	ONC	1.04338	1.3478	-0.304422	0.00283051	-0.500435	0.673376	-1.17381	1.80755e-06	0	0
ESAM	Q96AP7	CAR	1.95673	2.25884	-0.302109	0.00299183	0.67948	1.13483	-0.455346	0.00768782	0	0
SIGLEC1	Q9BZZ2	INF	1.10329	1.48401	-0.38072	0.00301364	0.413603	1.41337	-0.999771	8.92601e-05	0	0
FAM3C	Q92520	CAR	1.6156	1.83095	-0.215347	0.00309451	0.975544	1.30091	-0.325366	0.0714266	0	0
LACTB2	Q53H82	CAR	1.81889	2.16513	-0.346244	0.00316183	2.44703	3.49537	-1.04834	5.60084e-05	0	0
THOP1	P52888	CAR	0.475992	0.809999	-0.334007	0.00316183	-0.478816	0.192607	-0.671423	0.000426973	0	0
CHI3L1	P36222	CAR	1.56976	2.26247	-0.692706	0.00318778	0.80153	1.73185	-0.930324	0.0106596	0	0
C2	P06681	CAR	1.40151	1.66444	-0.262933	0.00318778	0.690517	1.03392	-0.343405	0.00336354	0	0
CXCL11	O14625	NEU	3.34156	3.95187	-0.610313	0.00327744	1.47363	3.29359	-1.81996	2.90482e-06	0	0	4.31e-07
ACP6	Q9NPH0	ONC	1.05426	1.46928	-0.41502	0.00330961	0.705221	1.03012	-0.324904	0.202764	0	0
APP	P05067	NEU	4.61933	5.00355	-0.384219	0.003311	1.07008	2.0902	-1.02013	9.28233e-05	0	0
MFGE8	Q08431	NEU	0.591961	0.968029	-0.376068	0.003311	-0.0608223	0.398708	-0.45953	0.0423227	0	0
TNFRSF14	Q92956	INF	1.76158	2.08605	-0.324464	0.00332017	0.472033	1.1279	-0.655871	0.000412258	0	0
LAT2	Q9GZY6	ONC	1.49369	1.91486	-0.421169	0.00335407	1.98672	2.72598	-0.739259	0.0605414	0	0
MITD1	Q8WV92	NEU	1.94628	2.4835	-0.537224	0.00341476	3.23891	4.42186	-1.18295	0.000174013	0	0
DPEP1	P16444	NEU	0.630241	0.279945	0.350296	0.00341476	0.142587	-0.0705778	0.213165	0.239716	0	0
PDGFC	Q9NRA1	ONC	0.0697205	0.417682	-0.347962	0.00349345	-0.376982	0.147263	-0.524245	0.000412258	0	0
TSPAN1	O60635	CAR	0.785052	1.63111	-0.846061	0.00351452	0.564357	1.41728	-0.852921	0.150473	0	0
TINAGL1	Q9GZM7	CAR	0.813762	1.01023	-0.196467	0.00351889	0.356653	0.81459	-0.457938	0.000491451	0	0
IL18R1	Q13478	INF	1.29467	1.59608	-0.30141	0.00360376	0.655271	1.1203	-0.465031	0.00132582	0	0
CLEC1B	Q9P126	NEU	4.13181	4.60605	-0.474232	0.00363229	1.84735	3.13959	-1.29224	0.00229749	0	0
DNER	Q8NFT8	INF	0.722637	0.408859	0.313779	0.00374341	0.155105	-0.403493	0.558598	0.00429664	0	0
OSMR	Q99650	CAR	0.796607	0.99758	-0.200973	0.00376885	0.358016	0.623758	-0.265742	0.00544865	0	0
IL12RB1	P42701	INF	1.09615	1.36872	-0.272574	0.0038565	0.709029	1.08213	-0.373096	0.0196789	0	0
GFRA3	O60609	NEU	1.33188	1.10005	0.23183	0.00385682	0.718407	0.665962	0.0524455	0.490379	0	0
VWA1	Q6PCB0	ONC	1.63525	2.15996	-0.524715	0.00386149	0.736916	1.73603	-0.999117	0.000238943	0	0
HSPA1A	P0DMV8	INF	1.79774	2.32107	-0.523323	0.00387948	1.28027	2.52761	-1.24734	0.000561839	0	0
PQBP1	O60828	ONC	0.840831	1.18745	-0.346621	0.0038922	-0.116331	0.918145	-1.03448	0.000351772	0	0
SIAE	Q9HAT2	ONC	2.7218	3.02764	-0.305842	0.00390308	0.648408	1.61595	-0.967543	2.74497e-05	0	0
CXCL5	P42830	CAR	6.16893	6.75713	-0.588195	0.0039956	3.99073	4.86341	-0.872679	0.0306375	0	0
BTN2A1	Q7KYR7	INF	0.921215	1.15527	-0.234053	0.00411648	0.343765	0.633764	-0.289999	0.0673132	0	0
FXN	Q16595	ONC	1.74161	2.04766	-0.306057	0.00412263	3.2537	4.5025	-1.2488	0.000437826	0	0
CA12	O43570	ONC	1.10641	1.51307	-0.406653	0.00416011	0.205369	0.725949	-0.52058	0.00876243	0	0
KCNIP4	Q6PIL6	NEU	0.955547	0.691226	0.264321	0.00417438	0.269908	0.277624	-0.00771623	0.642211	0	0
SCRN1	Q12765	INF	2.96451	3.47622	-0.511715	0.00421679	3.12964	4.0114	-0.881758	0.0159126	0	0		0.000727
LGALS1	P09382	CAR	1.27869	1.57369	-0.295	0.0042553	0.981422	1.61543	-0.634012	0.00768782	0	0
ITGA11	Q9UKX5	INF	0.621505	0.259297	0.362208	0.00432359	1.24022	0.467031	0.773193	0.0101357	0	0
GGH	Q92820	CAR	0.671072	0.985054	-0.313982	0.00435453	0.161477	0.611563	-0.450087	0.000215043	0	0
ODAM	A1E959	NEU	0.946885	1.1623	-0.215418	0.00439431	0.65466	0.774718	-0.120057	0.553088	0	0
ST3GAL1	Q11201	ONC	0.464418	0.677426	-0.213008	0.0044341	-0.318503	0.112119	-0.430621	0.0204162	0	0
FCER2	P06734	NEU	0.929331	1.33338	-0.404045	0.00453413	0.588216	0.968846	-0.38063	0.114606	0	0
TIGAR	Q9NQ88	NEU	0.778667	1.2216	-0.442929	0.00462469	0.0648192	0.558706	-0.493887	0.00399419	0	0
ACAA1	P09110	ONC	1.5371	2.14023	-0.60313	0.0047155	1.67003	1.96283	-0.292799	0.0621859	0	0
GCNT1	Q02742	ONC	1.21208	1.49928	-0.287206	0.00472433	0.291378	0.728936	-0.437558	0.00876243	0	0
DCTN1	Q14203	ONC	3.25808	3.6808	-0.422714	0.00479536	2.6838	3.39879	-0.714988	0.0207187	0	0
GPR37	O15354	CAR	0.75591	1.34232	-0.58641	0.00515354	0.5976	1.98692	-1.38932	1.11577e-05	0	0	0.000726
KLK4	Q9Y5K2	ONC	1.69033	2.2314	-0.541072	0.00533509	1.17961	1.93181	-0.752201	0.0414405	0	0
MAPK9	P45984	INF	1.96953	2.31553	-0.345999	0.0054009	1.61954	2.29888	-0.679337	0.00486162	0	0
CCN4	O95388	ONC	2.00741	2.40173	-0.394315	0.00544941	0.971159	1.78928	-0.818119	0.000106082	0	0
MIF	P14174	NEU	2.46754	3.11352	-0.645977	0.00545186	2.29028	3.85789	-1.56761	1.04737e-05	0	0
GBP2	P32456	INF	1.49664	1.99904	-0.502402	0.0055191	1.06417	1.73273	-0.668563	0.0447202	0	0
TGFB1	P01137	INF	2.73749	3.00483	-0.267332	0.00556354	1.0077	1.74222	-0.734518	0.000238943	0	0
LAYN	Q6UX15	NEU	1.57209	1.92215	-0.350062	0.00564357	1.02353	1.38237	-0.35884	0.132628	0	0
STC2	O76061	NEU	0.378419	0.735254	-0.356835	0.00567728	-0.000688631	0.556528	-0.557216	0.0222409	0	0
CCL20	P78556	INF	0.40988	1.09024	-0.68036	0.00567728	0.477374	0.944603	-0.467229	0.253	0	0
ANGPTL1	O95841	CAR	1.05558	1.26903	-0.213459	0.00573934	0.424365	0.913717	-0.489352	0.0199329	0	0
EPHB6	O15197	NEU	1.95829	2.23449	-0.276192	0.00591289	1.11799	1.60704	-0.489053	0.015642	0	0
Q11128/FUT3	P21217	NEU	0.89787	1.31101	-0.413144	0.00598749	0.175922	1.39657	-1.22064	3.63741e-06	0	0
HEXIM1	O94992	INF	2.00323	2.42688	-0.423654	0.00609903	2.94869	4.08917	-1.14048	0.00187125	0	0
CBLN4	Q9NTU7	ONC	0.839173	0.536223	0.30295	0.00618294	-0.202447	-0.388655	0.186208	0.450741	0	0
SEPTIN9	Q9UHD8	ONC	1.09443	1.32414	-0.229706	0.00619098	0.804434	1.29352	-0.489089	0.00876243	0	0
ICAM1	P05362	CAR	1.41364	1.6611	-0.247465	0.00631988	0.846652	1.36421	-0.517557	3.406e-05	0	0
CPPED1	Q9BRF8	NEU	1.60846	1.98748	-0.379025	0.00634751	1.26783	2.18859	-0.920758	0.00325185	0	0
YES1	P07947	ONC	2.21472	2.70897	-0.49425	0.00644986	2.69694	3.65514	-0.958199	0.0204162	0	0
QDPR	P09417	CAR	0.963298	1.21259	-0.249288	0.00667755	1.3425	2.15465	-0.812156	5.6233e-06	0	0
SERPINB6	P35237	NEU	1.36104	1.60736	-0.246325	0.00672689	1.49895	2.24939	-0.750442	0.00203974	0	0	0.000481
MVK	Q03426	INF	1.11326	1.53271	-0.419446	0.00673695	0.956342	1.69828	-0.74194	0.00296763	0	0
TNC	P24821	CAR	1.25048	1.65235	-0.401863	0.00677126	0.675926	1.14917	-0.473243	0.0912771	0	0
PDCD5	O14737	NEU	2.47915	2.84639	-0.367246	0.00705822	2.68398	4.12716	-1.44317	8.74067e-07	0	0
CGREF1	Q99674	CAR	0.921354	1.25642	-0.335067	0.00752516	0.52507	0.97264	-0.44757	0.00625359	0	0
PPP1R2	P41236	CAR	1.47587	1.83576	-0.359881	0.00767543	2.1208	3.17279	-1.05199	0.000320319	0	0
CTSH	P09668	CAR	1.00785	1.49944	-0.491595	0.00772008	0.505262	0.472446	0.0328162	0.619387	0	0
FIS1	Q9Y3D6	INF	2.01428	2.58174	-0.567463	0.00782313	1.40205	2.94134	-1.5393	6.13789e-05	0	0
IL18BP	O95998	CAR	1.07137	1.32946	-0.258089	0.00791318	0.501965	1.0723	-0.570333	0.000215043	0	0
CCL14	Q16627	CAR	2.55041	2.83672	-0.286309	0.00791318	1.04209	1.63414	-0.592052	0.00134262	0	0
SMPDL3A	Q92484	INF	1.13051	0.697178	0.43333	0.00799862	0.044039	0.160253	-0.116214	0.51081	0	0
CD300LF	Q8TDQ1	ONC	1.21357	1.67255	-0.45898	0.00808525	0.59117	1.32464	-0.733475	0.00624465	0	0
NRP1	O14786	CAR	1.08571	1.32058	-0.234872	0.00822436	0.445093	0.837483	-0.392391	0.00429664	0	0
INPPL1	O15357	ONC	1.27525	1.66523	-0.389985	0.00855163	1.56852	2.54502	-0.976502	0.00114077	0	0
CDKN1A	P38936	ONC	1.79093	2.24308	-0.452146	0.00855163	2.78582	4.27679	-1.49097	0.000851341	0	0
IQGAP2	Q13576	ONC	1.69381	2.08559	-0.391773	0.00872277	0.637301	1.04792	-0.410622	0.055725	0	0
LYN	P07948	ONC	1.43677	1.67288	-0.236113	0.00872294	2.77482	3.4552	-0.680376	0.0329269	0	0
FCGR2A	P12318	CAR	0.671658	0.968264	-0.296606	0.00887977	0.37491	0.893393	-0.518483	0.00261325	0	0
LRPAP1	P30533	NEU	1.39562	1.53235	-0.13673	0.00894675	0.435146	1.27775	-0.842607	0.000370211	0	0
ING1	Q9UK53	NEU	0.519241	0.853956	-0.334715	0.00900065	-0.272676	0.288616	-0.561292	0.000584743	0	0
TNFRSF19	Q9NS68	ONC	1.4309	1.7576	-0.326691	0.00922017	0.559787	0.966189	-0.406403	0.0950083	0	0
ATP5IF1	Q9UII2	INF	2.61695	3.14076	-0.52381	0.00932893	4.37057	5.63419	-1.26361	0.00380513	0	0	0.00082
APLP1	P51693	CAR	1.09982	0.833334	0.266489	0.00933264	1.25494	0.954431	0.30051	0.13003	0	0
IL7	P13232	INF	3.90751	4.38798	-0.480476	0.00933505	1.64966	2.28673	-0.637072	0.0197222	0	0
TXNDC15	Q96J42	ONC	0.726162	0.93006	-0.203898	0.00936682	0.450093	0.726202	-0.276109	0.0494126	0	0
ADAMTS8	Q9UP79	ONC	0.6958	0.427755	0.268045	0.00936721	0.0215417	-0.0292344	0.0507761	0.525722	0	0
BPIFB1	Q8TDL5	CAR	1.86264	1.42387	0.438764	0.00940153	0.973431	0.877325	0.0961065	0.653844	0	0
STX6	O43752	ONC	0.412375	0.730358	-0.317983	0.0094392	0.0964557	0.835881	-0.739425	0.000877572	0	0
LRRN1	Q6UXK5	INF	1.68619	1.30223	0.383966	0.00945991	1.01056	0.550126	0.460437	0.0982003	0	0
F11R	Q9Y624	NEU	1.66931	1.97891	-0.309605	0.00947443	1.09343	2.02209	-0.928662	0.000238273	0	0
TMPRSS5	Q9H3S3	NEU	1.46264	1.16856	0.294082	0.00952309	0.722583	0.70104	0.0215429	0.760952	0	0
TGFA	P01135	INF	2.80115	3.25104	-0.449887	0.00955318	0.408448	1.06172	-0.653276	5.78157e-05	0	0
MEGF9	Q9H1U4	CAR	0.989978	0.819376	0.170602	0.00958143	0.469581	0.339553	0.130028	0.37688	0	0
TBL1X	O60907	ONC	2.10357	2.47768	-0.374109	0.00962677	2.06502	2.85011	-0.785087	0.0131579	0	0
FABP4	P15090	CAR	1.17158	1.73108	-0.559495	0.00976423	0.751185	1.25791	-0.506724	0.0879972	0	0
RBP5	P82980	ONC	0.978071	1.38351	-0.405435	0.00981668	0.195185	0.671568	-0.476384	0.0204162	0	0
NTRK3	Q16288	NEU	1.02448	0.80872	0.215759	0.00982051	0.576023	0.374185	0.201838	0.243732	0	0
NADK	O95544	CAR	2.9736	3.52532	-0.551722	0.00988857	0.242091	1.23744	-0.99535	0.00693856	0	0
F7	P08709	CAR	0.875295	1.10075	-0.225457	0.00995047	0.736548	0.8303	-0.0937517	0.25668	0	0
CD46	P15529	CAR	1.29472	1.53076	-0.236042	0.0101397	0.729095	1.13453	-0.405438	0.00767905	0	0
ACTA2	P62736	CAR	1.22383	1.56557	-0.34174	0.0101685	0.592641	1.42913	-0.836486	0.0035578	0	0
PDGFB	P01127	INF	5.58263	5.96138	-0.378753	0.0101747	2.25921	3.45888	-1.19967	0.00296763	0	0
IGFBP4	P22692	NEU	1.8763	2.24146	-0.365156	0.0102268	0.832557	1.78183	-0.949271	0.000109279	0	0
COL6A3	P12111	CAR	1.53261	1.83763	-0.305025	0.0103321	1.02781	1.61332	-0.585507	0.00693856	0	0
FCRLB	Q6BAA4	ONC	0.748807	1.17322	-0.42441	0.0104107	0.25964	1.04395	-0.784308	0.00134262	0	0
ANGPT1	Q15389	INF	5.10936	5.50919	-0.399834	0.0110882	1.28408	2.55183	-1.26775	0.00429664	0	0
DAG1	Q14118	INF	1.79269	2.09765	-0.304958	0.0110882	0.64182	1.37066	-0.728835	0.000409818	0	0
PLIN3	O60664	CAR	1.04188	1.31604	-0.274163	0.0110897	0.840273	1.4494	-0.609129	0.00064721	0	0
PARP1	P09874	INF	1.31431	1.81303	-0.498725	0.0112116	1.26721	1.95435	-0.687143	0.00427041	0	0
DSG4	Q86SJ6	ONC	0.94269	0.524107	0.418583	0.0112459	0.00822054	0.0146734	-0.00645286	1	0	0
SCARF1	Q14162	CAR	2.16839	2.49237	-0.323983	0.0113438	0.752774	1.45653	-0.703755	0.00203974	0	0
CPM	P14384	NEU	1.0744	0.838428	0.235976	0.0113773	0.245912	0.104017	0.141895	0.313098	0	0
EBAG9	O00559	NEU	1.71557	2.07301	-0.357444	0.0118517	3.03405	3.99457	-0.960519	0.0142048	0	0
SERPINA11	Q86U17	CAR	1.6889	2.0047	-0.315795	0.0119922	0.891723	1.89804	-1.00632	3.29525e-05	0	0
BTN3A2	P78410	INF	1.74903	2.10858	-0.359546	0.01227	1.22119	1.97267	-0.751484	0.000226852	0	0
SPINT2	O43291	INF	0.468059	1.13626	-0.6682	0.0123319	-0.573683	0.735627	-1.30931	6.96369e-05	0	0
ICOSLG	O75144	ONC	1.01653	0.884502	0.132024	0.012377	0.387522	0.239297	0.148226	0.112155	0	0
GLRX	P35754	CAR	1.8355	2.13182	-0.296319	0.0124186	1.16388	2.17991	-1.01603	9.28233e-05	0	0
ILKAP	Q9H0C8	NEU	1.53082	1.90957	-0.378756	0.012492	0.683361	1.59807	-0.914705	3.65198e-05	0	0
RSPO3	Q9BXY4	ONC	0.852634	1.17353	-0.320901	0.0125197	0.620188	1.2049	-0.584711	0.0105504	0	0
PON3	Q15166	INF	0.673311	0.517499	0.155812	0.012595	0.307136	-0.148403	0.45554	0.0528714	0	0
VWF	P04275	CAR	1.20019	1.57503	-0.374839	0.0126732	-1.0307	-1.03908	0.00838789	0.609761	0	0
CXCL13	O43927	NEU	2.86137	3.167	-0.305626	0.0126848	1.08111	2.14423	-1.06312	0.000845823	0	0	0.000541
BCR	P11274	INF	1.79897	2.1678	-0.368824	0.0128316	2.08281	3.10321	-1.0204	0.00374289	0	0
LAG3	P18627	ONC	1.0449	1.27518	-0.230277	0.0131028	0.388213	0.79499	-0.406777	0.0605414	0	0
HS3ST3B1	Q9Y662	ONC	0.723652	1.18562	-0.461973	0.013103	0.18881	0.713495	-0.524685	0.00488709	0	0
VEGFD	O43915	INF	1.54867	1.35023	0.198443	0.0132954	0.779115	0.919739	-0.140625	0.810218	0	0
HPGDS	O60760	ONC	0.64632	0.385275	0.261045	0.0133651	0.278292	-0.0996474	0.37794	0.0376259	0	0
S100P	P25815	CAR	2.74924	3.11879	-0.369547	0.01358	1.46807	2.3264	-0.858333	0.022694	0	0
USO1	O60763	ONC	2.89224	3.33616	-0.44392	0.0136077	3.56572	4.54247	-0.976749	0.0150481	0	0
LRP11	Q86VZ4	CAR	1.39322	1.6309	-0.237685	0.0136319	0.920212	1.33846	-0.418249	0.021774	0	0
PLA2G4A	P47712	INF	1.36576	1.59991	-0.234148	0.0136977	2.70551	3.64595	-0.940447	0.00544865	0	0
Q29983/MICB	Q29980	INF	0.556537	1.21729	-0.660752	0.0137168	0.0292774	0.293909	-0.264632	0.265292	0	0
NUCB2	P80303	ONC	1.89411	2.09335	-0.199245	0.0137876	0.949848	1.66724	-0.717392	0.000673601	0	0
CCL5	P13501	CAR	4.50221	4.9753	-0.47309	0.0138846	3.67456	4.80518	-1.13062	0.00544865	0	0
XRCC4	Q13426	NEU	0.841366	1.01822	-0.176852	0.0140028	0.370191	0.965294	-0.595103	8.61193e-05	0	0
PON2	Q15165	CAR	-0.0514649	0.13146	-0.182925	0.0141858	0.193763	0.547054	-0.35329	0.00194062	0	0
ICA1	Q05084	INF	2.11174	2.43259	-0.320849	0.0143802	1.58172	2.48599	-0.904274	0.000181467	0	0
EPHB4	P54760	CAR	1.17696	1.41443	-0.237472	0.0143968	0.685746	1.06871	-0.382964	0.0281797	0	0
CTSV	O60911	ONC	1.00994	0.658466	0.351471	0.0146016	0.306332	0.0529977	0.253334	0.170038	0	0
IMPA1	P29218	NEU	1.24671	1.47943	-0.232722	0.0146715	1.94591	2.78555	-0.839638	0.00316384	0	0
TMPRSS15	P98073	ONC	0.607068	-0.0633213	0.67039	0.0149453	-0.258254	-1.10534	0.847081	0.036071	0	0
ICAM3	P32942	CAR	1.14048	0.943144	0.197339	0.0150608	0.56725	0.692043	-0.124793	0.37688	0	0
CEACAM8	P31997	CAR	3.18443	3.46235	-0.277927	0.0151402	1.19695	1.80229	-0.605336	0.0116662	0	0
IGF2R	P11717	NEU	1.0615	1.31416	-0.252657	0.0153924	0.495754	0.923386	-0.427632	0.000426973	0	0
CA5A	P35218	CAR	-0.548692	0.195036	-0.743727	0.0154705	-0.819929	-0.588044	-0.231884	0.2958	0	0
SCAMP3	O14828	ONC	2.69159	3.19236	-0.500772	0.015512	1.69578	2.8044	-1.10861	0.00979593	0	0
VASN	Q6EMK4	CAR	0.8916	1.08622	-0.194625	0.0156112	0.413959	0.555017	-0.141058	0.447697	0	0
FOLR2	P14207	NEU	1.40162	1.56661	-0.164995	0.0157047	0.881889	1.30413	-0.422238	0.0125802	0	0
IL24	Q13007	INF	0.243923	0.578861	-0.334938	0.0157405	0.429779	0.53933	-0.109551	0.40814	0	0
GPC1	P35052	ONC	0.504956	0.722439	-0.217483	0.0160526	-0.102096	0.248007	-0.350103	0.0142048	0	0
MMP9	P14780	NEU	2.90224	3.18613	-0.283887	0.0162508	0.61273	1.55721	-0.944477	0.000128323	0	0
KLRD1	Q13241	INF	1.0503	1.39624	-0.345937	0.0165462	0.567756	1.24529	-0.677531	0.00500993	0	0
MED18	Q9BUE0	ONC	1.52623	1.74527	-0.219043	0.0167261	2.38662	3.19364	-0.807016	0.00544865	0	0
LHPP	Q9H008	INF	1.83325	2.17682	-0.343567	0.0168355	1.60798	2.65133	-1.04335	0.000481871	0	0
TP53	P04637	ONC	0.112056	0.502964	-0.390908	0.016881	-0.156603	0.429427	-0.58603	0.00101348	0	0
NBL1	P41271	ONC	0.928772	1.14221	-0.213435	0.0169422	0.364597	0.784941	-0.420344	0.00850635	0	0
CD300C	Q08708	NEU	1.17776	1.42318	-0.245421	0.0174394	0.730146	1.18665	-0.456507	0.0283598	0	0
DKK1	O94907	NEU	4.53277	4.82668	-0.29391	0.0177443	1.58456	2.5372	-0.952634	0.00180797	0	0
IGF1R	P08069	ONC	1.21308	1.37798	-0.164906	0.0181364	0.391583	0.780364	-0.388781	0.00199343	0	0
LILRA5	A6NI73	CAR	1.21903	1.44168	-0.22265	0.0185758	0.610889	1.07316	-0.462276	0.0166434	0	0
CRLF1	O75462	INF	0.891288	1.124	-0.232715	0.0186289	0.356542	0.699994	-0.343452	0.148589	0	0
SLAMF8	Q9P0V8	ONC	1.15322	1.49051	-0.337286	0.0186699	0.475509	1.02623	-0.550726	0.0262019	0	0
INHBC	P55103	NEU	0.993285	1.34604	-0.352752	0.0187489	0.375258	1.04699	-0.671735	0.000370211	0	0
CD207	Q9UJ71	ONC	1.01165	0.741922	0.269725	0.0189792	0.0795884	0.169296	-0.0897071	0.931258	0	0
FGF23	Q9GZV9	ONC	0.139721	0.473149	-0.333427	0.0189861	0.941346	1.35326	-0.411918	0.160036	0	0
PTX3	P26022	INF	1.87949	2.14222	-0.262732	0.0189994	1.84951	2.29692	-0.447403	0.0621625	0	0
MZB1	Q8WU39	INF	1.06337	1.44368	-0.380319	0.019007	0.386527	1.35579	-0.969261	0.00229671	0	0
OSCAR	Q8IYS5	INF	1.29091	1.54293	-0.252013	0.0197834	0.36759	0.997232	-0.629642	0.000412258	0	0
COL1A1	P02452	CAR	0.613735	0.803077	-0.189342	0.0198118	0.358939	0.584903	-0.225964	0.0494126	0	0
OMG	P23515	ONC	1.64512	1.19828	0.44684	0.0200353	0.563301	0.467709	0.0955921	0.742951	0	0
ADGRG1	Q9Y653	ONC	1.10505	1.46116	-0.356104	0.0200353	0.225478	1.08754	-0.862059	0.00151465	0	0
NTRK2	Q16620	CAR	0.955252	0.753853	0.201399	0.0203011	0.447238	0.202869	0.244369	0.156032	0	0
CLEC4G	Q6UXB4	INF	1.38286	1.6556	-0.272739	0.0206796	0.810868	1.35824	-0.547372	0.00486162	0	0
NINJ1	Q92982	ONC	0.50975	0.73553	-0.22578	0.0208079	0.230246	0.340131	-0.109885	0.698545	0	0
C1QA	P02745	INF	0.650565	0.791877	-0.141312	0.0208362	0.607214	0.785628	-0.178414	0.132628	0	0
PLAU	P00749	NEU	1.19612	1.40981	-0.213697	0.0208369	0.46726	0.853357	-0.386098	0.00406784	0	0
PPP1R9B	Q96SB3	INF	3.26206	3.66791	-0.405849	0.0208369	3.70316	4.31358	-0.610421	0.160036	0	0
TSLP	Q969D9	CAR	0.616702	0.360144	0.256559	0.0216871	0.39896	0.565552	-0.166592	0.226919	0	0
CXCL16	Q9H2A7	CAR	1.27842	1.48629	-0.207867	0.0217874	0.693668	1.10487	-0.411198	0.00768782	0	0
LDLR	P01130	CAR	0.015651	0.33913	-0.323479	0.0219756	-0.730406	-0.333487	-0.39692	0.0879972	0	0
EGLN1	Q9GZT9	INF	2.62675	3.25684	-0.630095	0.022023	0.030705	1.24353	-1.21282	1.18116e-05	0	0
ASGR1	P07306	NEU	1.37517	1.60927	-0.234099	0.0221317	0.740008	1.32719	-0.587179	0.00559768	0	0
CD74	P04233	NEU	1.7172	1.92748	-0.210277	0.0221537	1.11119	1.83163	-0.72044	0.000109279	0	0
SERPINE1	P05121	CAR	3.51213	3.74797	-0.235841	0.0223552	0.871904	1.63798	-0.766076	0.00850635	0	0
SHMT1	P34896	INF	1.32331	1.75588	-0.432566	0.0227229	2.05518	2.67588	-0.6207	0.0410473	0	0
DAB2	P98082	ONC	1.59702	1.81561	-0.218592	0.0227855	3.15612	4.59138	-1.43526	0.000377601	0	0
TJAP1	Q5JTD0	ONC	1.56932	1.8651	-0.29578	0.0228609	1.42276	2.31358	-0.890826	0.00124638	0	0
CD27	P26842	ONC	1.15419	1.41452	-0.260333	0.0228609	0.534318	1.2924	-0.758084	0.00939923	0	0
TGFBR2	P37173	ONC	0.99578	1.21423	-0.218448	0.0232843	0.417799	0.802466	-0.384667	0.0423227	0	0
TNFSF11	O14788	INF	0.780062	0.0926693	0.687393	0.0234417	0.0304565	-0.435353	0.46581	0.315744	0	0
SIRT2	Q8IXJ6	ONC	2.88234	3.27072	-0.388383	0.0235171	3.95008	5.37388	-1.4238	0.000201215	0	0
GLOD4	Q9HC38	INF	1.92138	2.17524	-0.253862	0.0236296	2.2321	2.92734	-0.695241	2.7766e-05	0	0
VEGFC	P49767	ONC	3.26584	3.51312	-0.247285	0.0241515	0.662322	1.24952	-0.587203	0.0151801	0	0
ACY1	Q03154	CAR	0.48434	0.866403	-0.382062	0.0241752	-1.10758	-0.667818	-0.439766	0.0714266	0	0
FADD	Q13158	CAR	1.96245	2.24996	-0.28751	0.0241752	2.51789	3.55274	-1.03485	0.000320319	0	0
IL1RL2	Q9HB29	INF	1.45862	1.76458	-0.305955	0.0243756	0.809328	1.11192	-0.302594	0.0262019	0	0
GFAP	P14136	ONC	1.29536	1.65586	-0.3605	0.0244154	0.198592	0.817035	-0.618443	0.00484285	0	0
TXNDC5	Q8NBS9	NEU	1.50407	1.77208	-0.268013	0.0249015	1.6507	2.67112	-1.02042	0.00505831	0	0
EGFR	P00533	CAR	0.999872	0.853686	0.146185	0.025606	0.575059	0.361105	0.213954	0.13003	0	0
VPS53	Q5VIR6	ONC	0.961479	1.17074	-0.209266	0.0256696	1.38191	2.12778	-0.745878	0.0109329	0	0
FHIT	P49789	NEU	1.93378	2.34802	-0.41424	0.0258148	2.73254	3.80846	-1.07592	0.00101722	0	0
CETN2	P41208	NEU	0.773125	1.07471	-0.301584	0.0258148	0.206939	0.889702	-0.682764	0.00171507	0	0	0.000997
SCG2	P13521	ONC	0.440474	0.714306	-0.273832	0.0258233	0.438567	0.737568	-0.299001	0.191394	0	0
FLT3	P36888	ONC	1.62551	1.43094	0.19457	0.0259576	0.29557	-0.00581557	0.301386	0.0847406	0	0
DLL1	O00548	ONC	1.17274	1.42072	-0.247975	0.0259701	0.530821	0.894627	-0.363806	0.0306375	0	0
SRPK2	P78362	INF	0.811636	1.09966	-0.288025	0.0259827	0.444474	0.769111	-0.324638	0.0476609	0	0
DRAXIN	Q8NBI3	NEU	0.973612	1.41877	-0.445155	0.0264479	0.665375	1.08836	-0.422989	0.160036	0	0
OSM	P13725	INF	3.22654	3.67697	-0.45043	0.0265185	1.06409	2.31469	-1.2506	0.00799792	0	0
LGALS8	O00214	NEU	1.35689	1.60191	-0.245016	0.0266005	1.29092	2.34256	-1.05164	0.000204831	0	0
COL4A1	P02462	CAR	0.708427	1.11347	-0.405039	0.0267949	0.763408	1.02867	-0.265261	0.107439	0	0
ERBIN	Q96RT1	ONC	2.58563	3.04956	-0.463923	0.0270405	2.90427	3.8976	-0.993332	0.0109329	0	0
LBR	Q14739	NEU	3.40668	3.91088	-0.504201	0.0270406	1.35433	2.34884	-0.99451	0.000845823	0	0
DKKL1	Q9UK85	ONC	0.736356	1.18733	-0.450969	0.0270413	0.499051	0.499704	-0.000652857	0.958723	0	0
HAVCR1	Q96D42	ONC	0.824416	1.34595	-0.521535	0.0272289	0.031583	1.31919	-1.28761	0.00101722	0	0
THBD	P07204	CAR	0.884101	1.05194	-0.167834	0.027721	0.26379	0.681853	-0.418063	0.021774	0	0
IL1RN	P18510	INF	1.17825	1.46136	-0.283116	0.0281086	0.0899404	0.724266	-0.634326	0.0131579	0	0
OLR1	P78380	CAR	3.43073	3.94542	-0.514694	0.0281943	0.281639	1.32045	-1.03881	8.54712e-06	0	0
BCAN	Q96GW7	NEU	1.72377	1.51318	0.210582	0.0288658	0.988983	0.776166	0.212817	0.281039	0	0
FKBP5	Q13451	NEU	3.86601	4.40661	-0.540596	0.0291464	3.03348	4.61726	-1.58378	0.000174013	0	0
PRTFDC1	Q9NRG1	NEU	0.804152	1.07083	-0.266682	0.029251	2.56096	3.82646	-1.26549	0.00447691	0	0
FCGR3B	O75015	CAR	1.18996	0.965568	0.224396	0.0292576	0.543867	0.456792	0.0870745	0.649281	0	0
DBI	P07108	NEU	2.22575	2.64177	-0.416018	0.029327	1.95009	3.08577	-1.13567	0.000128323	0	0
YTHDF3	Q7Z739	INF	1.34173	1.75091	-0.409178	0.0294445	1.82113	2.68382	-0.862695	0.00261325	0	0
MATN2	O00339	INF	1.27343	1.54972	-0.276284	0.029756	0.832005	1.02396	-0.191957	0.0912771	0	0
CASP1	P29466	NEU	1.68269	2.00426	-0.321569	0.0298604	-0.0747058	0.544372	-0.619078	0.00194531	0	0
NEFL	P07196	NEU	1.83091	2.33754	-0.506627	0.0298604	1.13815	2.074	-0.935851	0.00116241	0	0
PROK1	P58294	INF	1.30177	0.803668	0.498105	0.0299381	0.845267	0.671183	0.174084	0.57305	0	0
TNFSF13B	Q9Y275	CAR	1.43188	1.56446	-0.132577	0.0302377	0.72054	1.38711	-0.66657	7.86483e-05	0	0
CD34	P28906	NEU	1.0805	0.911825	0.168676	0.0303007	0.749033	0.550882	0.198151	0.13003	0	0
FABP1	P07148	INF	1.40737	1.96776	-0.560383	0.0303233	0.888374	1.0605	-0.17213	0.749075	0	0
SELPLG	Q14242	INF	0.363677	0.125436	0.238241	0.0305434	0.591225	0.45438	0.136845	0.265292	0	0
STK11	Q15831	CAR	1.37361	1.56062	-0.187006	0.0305719	3.16839	4.25857	-1.09018	5.27435e-05	0	0
IRAG2	Q12912	CAR	0.760424	1.01155	-0.251124	0.0305719	0.0220668	0.391694	-0.369627	0.00316384	0	0
LAP3	P28838	INF	1.46477	1.68464	-0.219876	0.0310037	1.53237	2.04639	-0.514022	0.0287428	0	0
COMT	P21964	CAR	1.71096	2.02267	-0.311703	0.0311802	2.07756	3.09248	-1.01492	0.000584743	0	0
PDGFA	P04085	CAR	4.75976	5.08208	-0.322324	0.0312458	1.52871	2.58021	-1.0515	0.00180797	0	0
GGT1	P19440	NEU	0.689556	1.00013	-0.31057	0.0313422	0.227892	0.395929	-0.168037	0.13003	0	0	0.000744
REN	P00797	CAR	1.1689	1.45957	-0.290675	0.0317065	0.723181	0.923764	-0.200583	0.699135	0	0
USP8	P40818	CAR	0.148334	0.512891	-0.364557	0.0317989	-0.0704294	1.11241	-1.18284	0.000673601	0	0
OGFR	Q9NZT2	ONC	0.983884	1.24267	-0.258783	0.03208	0.405318	0.990196	-0.584879	0.000851341	0	0
WFIKKN2	Q8TEU8	INF	1.83015	1.45	0.380149	0.0320811	0.636366	0.556227	0.0801392	0.578151	0	0
PLA2G15	Q8NCC3	ONC	1.29959	1.48845	-0.188862	0.0321531	0.570916	1.0093	-0.438385	2.27906e-05	0	0
TFPI	P10646	CAR	1.12017	1.3643	-0.244129	0.0322817	0.475837	1.08925	-0.61341	0.000152691	0	0
CST6	Q15828	CAR	1.27692	1.01446	0.262453	0.0322826	0.744007	0.765915	-0.0219081	0.609761	0	0
PBLD	P30039	NEU	0.0916752	0.419259	-0.327584	0.0324083	0.156054	0.667953	-0.511899	0.000437826	0	0
CAMKK1	Q8N5S9	ONC	0.977778	1.25542	-0.277638	0.0327231	0.711594	1.18158	-0.469987	0.00484285	0	0
KIT	P10721	CAR	0.847669	0.628141	0.219528	0.0333487	0.390518	-0.076868	0.467386	0.00429664	0	0
SSB	P05455	NEU	1.28237	1.54631	-0.263939	0.0337507	0.567139	0.925102	-0.357963	0.0825275	0	0
MMP8	P22894	NEU	3.67446	4.32074	-0.646284	0.033893	0.135587	1.24463	-1.10905	0.000845823	0	0
IFNGR1	P15260	INF	0.646009	0.809586	-0.163577	0.0339257	0.0509625	0.372459	-0.321497	0.00767905	0	0
CCL2	P13500	NEU	2.08589	2.32393	-0.238039	0.0339561	0.49707	0.978314	-0.481245	0.0248256	0	0
CCL25	O15444	INF	1.60107	1.32548	0.275593	0.0340293	0.62893	0.554623	0.0743071	0.760952	0	0
HSPB1	P04792	CAR	2.89146	3.30153	-0.410063	0.0344393	4.98621	5.9707	-0.984489	9.28233e-05	0	0
MPI	P34949	ONC	1.03151	1.15099	-0.119484	0.0348879	3.60825	4.55791	-0.949667	0.00488709	0	0
PLAT	P00750	CAR	0.222133	0.649085	-0.426952	0.0350043	-0.674553	-0.660629	-0.0139236	0.72219	0	0
AOC3	Q16853	CAR	1.10522	0.915472	0.189743	0.0350043	0.581348	0.331358	0.24999	0.16905	0	0
DPEP2	Q9H4A9	ONC	0.920361	0.781762	0.138599	0.0354735	1.83635	1.6334	0.202956	0.0656865	0	0
SIGLEC5	O15389	NEU	1.1867	1.92048	-0.733783	0.0357337	-0.118321	1.83352	-1.95184	5.60084e-05	0	0
SPINK5	Q9NQ38	NEU	0.855828	0.637044	0.218784	0.0357337	0.349481	0.256403	0.093078	0.298303	0	0
PRDX6	P30041	ONC	1.99162	2.33159	-0.339969	0.0358916	3.23291	3.9248	-0.691894	0.00171507	0	0
MASP1	P48740	NEU	1.22942	1.05185	0.177571	0.0366056	0.702739	0.773278	-0.070539	0.961703	0	0
EDA2R	Q9HAV5	ONC	1.34134	1.66903	-0.327687	0.0368123	0.606398	1.55762	-0.951223	0.00132582	0	0
CPXM1	Q96SM3	ONC	3.62047	3.97945	-0.358977	0.0369427	0.371081	0.995409	-0.624328	0.00258362	0	0
SNAP29	O95721	ONC	3.55016	4.05433	-0.504173	0.0369427	3.62793	4.96532	-1.33739	0.00064721	0	0
CD4	P01730	INF	0.29455	0.483803	-0.189253	0.0371969	-0.335786	0.282996	-0.618782	2.40803e-05	0	0
C1QTNF1	Q9BXJ1	CAR	0.409076	0.614262	-0.205186	0.0373206	-0.480534	-0.147494	-0.33304	0.0912771	0	0
TNFSF13	O75888	INF	1.79244	2.05301	-0.260573	0.0378878	0.868477	1.48137	-0.612894	0.0106596	0	0
CLEC14A	Q86T13	NEU	1.2056	1.40174	-0.196136	0.0381187	0.588757	1.03907	-0.450311	0.0125802	0	0
ANGPTL4	Q9BY76	INF	0.803083	1.11018	-0.307093	0.038585	0.220376	0.737275	-0.516899	0.0145843	0	0
ISM1	B1AKI9	INF	1.00882	1.26933	-0.260507	0.0386663	0.782067	1.33721	-0.555145	0.0142552	0	0
NDUFS6	O75380	ONC	-0.000701642	0.391902	-0.392604	0.039302	0.570401	1.71678	-1.14638	0.00134262	0	0
MESD	Q14696	NEU	0.90086	0.996024	-0.0951646	0.0393618	2.54249	4.15461	-1.61213	0.000491451	0	0	0.000112
SELP	P16109	CAR	2.15749	2.37227	-0.214788	0.0397656	1.01339	1.83008	-0.816698	0.000758161	0	0
AGXT	P21549	CAR	0.025405	0.46331	-0.437906	0.0398665	-0.0224433	-0.0747499	0.0523065	0.54618	0	0
CXADR	P78310	INF	2.20378	2.55686	-0.353079	0.0401847	1.56466	1.78535	-0.220686	0.57305	0	0
PFDN2	Q9UHV9	NEU	0.926357	1.17945	-0.253092	0.0403948	0.423329	0.760669	-0.33734	0.0116662	0	0
CDHR2	Q9BYE9	ONC	0.799948	1.24833	-0.44838	0.040472	0.608625	1.56517	-0.956541	0.00227957	0	0
ARTN	Q5T4W7	INF	0.474843	0.687772	-0.21293	0.0407066	-0.10123	0.364462	-0.465692	0.00686088	0	0	0.000818
EPO	P01588	INF	0.871536	1.39579	-0.524249	0.0409626	0.302104	0.559737	-0.257633	0.46116	0	0
NCR1	O76036	INF	0.956307	1.12544	-0.169129	0.0409626	0.507487	0.934163	-0.426676	0.0159126	0	0
PTGDS	P41222	CAR	1.10844	1.30267	-0.194231	0.0410389	0.667482	1.23606	-0.568583	0.00544865	0	0
DNMBP	Q6XZF7	NEU	2.5399	2.897	-0.357103	0.0416673	0.986915	1.68477	-0.69786	0.00624465	0	0
AMFR	Q9UKV5	NEU	0.85886	1.06875	-0.209894	0.0420132	0.912897	1.15244	-0.239542	0.202764	0	0
NBN	O60934	INF	1.72876	2.1692	-0.440442	0.0423429	-0.63095	0.198264	-0.829214	2.25477e-05	0	0
CNTN3	Q9P232	NEU	0.593675	0.379374	0.214301	0.0426196	0.0925959	-0.128068	0.220664	0.165499	0	0
WFDC12	Q8WWY7	ONC	1.13095	0.822459	0.308487	0.0431265	0.294452	0.454633	-0.160181	0.910788	0	0
KITLG	P21583	CAR	0.765193	0.44336	0.321833	0.0431832	0.157615	-0.030309	0.187924	0.283971	0	0
CD40LG	P29965	INF	3.94277	4.30554	-0.362774	0.0432978	1.05845	2.00122	-0.942765	0.00280885	0	0
CR2	P20023	CAR	0.786292	0.546309	0.239983	0.0436884	0.341241	-0.189671	0.530911	0.0410473	0	0
SIRPB1	O00241	INF	1.40161	1.75229	-0.350684	0.0437768	0.655689	1.2091	-0.553414	0.0238516	0	0
LYPD8	Q6UX82	ONC	0.941993	0.637358	0.304635	0.0440482	0.200469	-0.0519449	0.252414	0.335381	0	0
ENG	P17813	CAR	1.00034	0.883258	0.117086	0.0443729	0.45675	0.421661	0.0350891	0.816697	0	0
ROBO1	Q9Y6N7	INF	1.03241	1.26878	-0.236373	0.0445653	0.368702	0.575266	-0.206564	0.215978	0	0
MMP12	P39900	ONC	1.04332	1.35632	-0.313007	0.0445664	-0.01515	0.748182	-0.763332	0.0486852	0	0
CD274	Q9NZQ7	NEU	1.60925	1.79305	-0.1838	0.0448167	0.824363	1.40618	-0.581816	0.000106082	0	0
NRTN	Q99748	INF	0.710126	0.992459	-0.282332	0.0449015	0.559418	0.426674	0.132744	0.42766	0	0
CLEC4C	Q8WTT0	INF	1.38607	1.71586	-0.329785	0.0450464	0.719364	0.830998	-0.111634	0.841711	0	0
GDNF	P39905	NEU	0.577399	0.858446	-0.281047	0.045415	0.165049	0.736883	-0.571834	0.0105504	0	0
GHRL	Q9UBU3	CAR	1.33294	1.71819	-0.385246	0.0460028	1.17992	2.21449	-1.03457	0.0138279	0	0
DCXR	Q7Z4W1	ONC	0.116264	0.446228	-0.329964	0.0460176	-0.049418	0.222648	-0.272066	0.100622	0	0
MSRA	Q9UJ68	ONC	2.2947	2.6354	-0.340692	0.0464012	2.25028	3.10844	-0.858159	0.00109725	0	0
LGALS3	P17931	CAR	1.39823	1.58763	-0.189394	0.046481	0.793554	1.10926	-0.315704	0.0391042	0	0
FLT4	P35916	ONC	1.25937	1.50606	-0.246686	0.0475688	0.540186	0.918315	-0.378129	0.00939923	0	0
TNFRSF13C	Q96RJ3	INF	0.501086	0.762262	-0.261176	0.0475892	0.475342	0.675446	-0.200104	0.51081	0	0
IL1B	P01584	INF	0.722273	1.02946	-0.307185	0.0475892	0.438982	1.14167	-0.702684	0.00858026	0	0
LILRB2	Q8N423	CAR	1.44182	1.58001	-0.138185	0.0479327	0.931755	1.26009	-0.328335	0.0360904	0	0
SLIT2	O94813	NEU	0.846463	1.10936	-0.2629	0.0481162	0.231018	0.517778	-0.28676	0.05693	0	0
DPP7	Q9UHL4	CAR	2.40928	2.70676	-0.297479	0.0482174	0.267702	1.31275	-1.04505	0.000491451	0	0
HAO1	Q9UJM8	ONC	-0.0144548	0.668648	-0.683103	0.0483445	-0.410299	-0.172229	-0.23807	0.214603	0	0
FLRT2	O43155	NEU	1.74461	1.98667	-0.242057	0.0490336	0.82981	1.21558	-0.385768	0.0207187	0	0
SCGB1A1	P11684	INF	0.715289	1.02483	-0.309544	0.0495479	0.356849	0.568118	-0.211269	0.749075	0	0
GRAP2	O75791	CAR	1.44527	1.69914	-0.253862	0.049743	4.76606	6.06891	-1.30285	0.00325185	0	0
PDCD1LG2	Q9BQ51	ONC	1.19884	1.36177	-0.162929	0.049863	0.498012	0.746095	-0.248084	0.112155	0	0
NCAM1	P13591	CAR	1.10073	0.947517	0.153211	0.0501815	0.609594	0.24193	0.367664	0.0528714	0	0
CST7	O76096	INF	2.72268	3.24068	-0.518004	0.0504222	0.876251	1.9103	-1.03405	0.00686088	0	0
CD164	Q04900	NEU	1.11125	1.30136	-0.190106	0.0505957	0.278839	0.401785	-0.122946	0.136853	0	0
CCL16	O15467	CAR	1.41857	1.69596	-0.277391	0.0509505	0.503403	1.28656	-0.783161	3.94427e-05	0	0
CNTN4	Q8IWV2	NEU	0.896695	0.76698	0.129715	0.0509856	0.300593	0.344604	-0.0440112	0.676347	0	0
CCN2	P29279	INF	2.93099	3.15464	-0.223655	0.0513093	1.0781	1.79591	-0.717813	0.00686088	0	0
FYB1	O15117	NEU	2.54999	2.90198	-0.351993	0.0513791	4.07081	5.29043	-1.21961	0.00203974	0	0
IGSF3	O75054	ONC	0.97453	1.2632	-0.288671	0.0522723	0.546729	0.773671	-0.226942	0.112155	0	0
MGMT	P16455	INF	3.31978	3.83895	-0.519172	0.0522922	5.35331	6.49072	-1.13741	0.017731	0	0
IL10	P22301	INF	-4.71247	-4.37481	-0.337656	0.052369	-4.91473	-4.71292	-0.201817	0.625181	0	0
RHOC	P08134	NEU	2.7507	3.11809	-0.367386	0.0535786	4.76367	6.33048	-1.56681	0.00220257	0	0
PXN	P49023	NEU	3.35879	3.80668	-0.447898	0.0549475	0.329883	1.16779	-0.837911	0.000238943	0	0
CD58	P19256	INF	0.713615	0.626731	0.0868838	0.0549896	0.239001	0.139727	0.0992738	0.191489	0	0
CIAPIN1	Q6FI81	ONC	2.9626	3.36531	-0.40271	0.0551006	2.96072	4.09243	-1.13171	0.000320319	0	0
PPCDC	Q96CD2	NEU	1.86705	2.03354	-0.166485	0.055293	2.06745	2.98174	-0.914293	0.000109279	0	0
SNAP23	O00161	CAR	3.40035	3.95122	-0.550871	0.0554051	4.6913	5.85164	-1.16034	0.00180797	0	0
DFFA	O00273	INF	2.74358	3.02346	-0.279876	0.05545	2.89217	4.12607	-1.2339	2.93707e-06	0	0
FGF21	Q9NSA1	ONC	1.43366	2.13289	-0.69923	0.055823	1.26459	2.81632	-1.55173	0.0414405	0	0
CEBPB	P17676	CAR	1.67329	2.03648	-0.363198	0.0558936	-0.0228407	0.018308	-0.0411487	0.688843	0	0
FOXO1	Q12778	INF	2.07406	2.30811	-0.234048	0.056265	2.40312	3.32879	-0.925668	0.00427041	0	0
RBP2	P50120	ONC	0.883477	0.516659	0.366818	0.0565037	0.395997	0.388951	0.00704643	0.822503	0	0
ITGB1	P05556	CAR	0.892549	0.771116	0.121433	0.0566144	0.632793	0.542295	0.0904986	0.51081	0	0
TNXB	P22105	NEU	0.880076	0.788861	0.0912154	0.0571519	0.411214	0.255271	0.155943	0.256687	0	0
PRCP	P42785	CAR	0.65612	0.890982	-0.234862	0.0574648	-0.150276	0.435201	-0.585477	2.30978e-06	0	0
METAP2	P50579	ONC	2.18335	2.4633	-0.27995	0.0576096	1.94464	3.16879	-1.22414	7.28394e-06	0	0
CRIP2	P52943	NEU	0.645901	0.919504	-0.273603	0.0584702	-0.835718	0.0095129	-0.845231	1.08579e-06	0	0
GALNT2	Q10471	ONC	0.795093	0.677025	0.118068	0.0585206	0.439071	0.171015	0.268055	0.0486852	0	0
SFTPA2	Q8IWL1	ONC	1.01066	0.747502	0.263159	0.0594258	0.200235	0.756107	-0.555872	0.0528714	0	0
FGR	P09769	NEU	1.92594	2.31136	-0.385418	0.060307	0.0652247	0.686527	-0.621303	8.94693e-05	0	0
BAMBI	Q13145	ONC	1.12274	1.19419	-0.0714529	0.0603454	0.426549	0.767641	-0.341091	0.00767905	0	0
FCN2	Q15485	CAR	1.08726	1.21041	-0.123147	0.0614233	0.810526	1.4447	-0.634172	0.00544865	0	0
TPP1	O14773	INF	2.27124	2.51936	-0.248122	0.061959	0.612798	1.36987	-0.757072	8.92601e-05	0	0
TPMT	P51580	ONC	1.15288	1.34309	-0.190211	0.0622201	1.38131	2.31926	-0.937952	0.000412258	0	0	0.000141
NOS3	P29474	NEU	-0.328385	-0.141689	-0.186697	0.0625689	-0.242612	0.446046	-0.688658	0.000204157	0	0
DECR1	Q16698	INF	0.918096	1.2435	-0.325403	0.0626954	1.90481	3.1587	-1.25389	0.000226852	0	0
LILRB1	Q8NHL6	CAR	1.06367	1.18343	-0.119759	0.0627928	0.496663	0.907652	-0.410989	0.000320319	0	0
VCAM1	P19320	CAR	1.1362	1.26424	-0.12804	0.0627928	0.575127	0.870107	-0.29498	0.0344428	0	0
RWDD1	Q9H446	NEU	2.70007	2.928	-0.227931	0.0630308	3.66653	4.72081	-1.05428	0.000276572	0	0
ALCAM	Q13740	CAR	1.17842	1.34124	-0.162824	0.0637194	0.585498	0.746195	-0.160697	0.219181	0	0
RP2	O75695	ONC	1.32214	1.48568	-0.163542	0.0648382	0.876901	1.37105	-0.494149	0.00782439	0	0
SFTPA1	Q8IWL2	ONC	0.976374	0.652806	0.323568	0.0651221	0.393921	0.818287	-0.424366	0.489284	0	0
PTPRN2	Q92932	NEU	1.64037	1.58722	0.0531432	0.0659363	0.979605	1.19355	-0.213944	0.553088	0	0
STX8	Q9UNK0	INF	0.555651	0.82337	-0.267719	0.0661312	-0.444468	-0.0307955	-0.413673	0.00708369	0	0
SAMD9L	Q8IVG5	INF	2.78532	3.13957	-0.354248	0.0661312	1.43941	2.45883	-1.01942	0.00063837	0	0
SNCG	O76070	NEU	2.31307	2.79563	-0.482565	0.0664975	0.827425	2.50016	-1.67273	0.00101722	0	0
ERBB2	P04626	ONC	0.668186	0.876544	-0.208358	0.0666651	-0.0287593	0.147671	-0.17643	0.196412	0	0
IL17D	Q8TAD2	INF	1.32564	1.15723	0.168405	0.066703	0.843042	1.30193	-0.458891	0.0410473	0	0
BACH1	O14867	INF	2.71362	3.04239	-0.328771	0.0667177	1.15252	1.99608	-0.84356	0.000226852	0	0
NAMPT	P43490	ONC	1.78336	2.03194	-0.248584	0.0671182	0.861948	1.13855	-0.276599	0.22901	0	0
SNX9	Q9Y5X1	CAR	1.82855	2.12441	-0.295862	0.0673451	1.84646	2.81625	-0.969787	0.000238273	0	0
LEP	P41159	CAR	2.02359	1.58016	0.443433	0.0673451	1.55936	1.04367	0.515683	0.393965	0	0
IL1R2	P27930	INF	0.572594	0.482581	0.0900131	0.0673722	0.144625	0.0890792	0.0555458	0.732789	0	0
SMOC2	Q9H3U7	INF	1.23379	1.47485	-0.241066	0.0673722	0.486324	0.914858	-0.428534	0.0673132	0	0
PPP1R12A	O14974	ONC	1.83812	2.23425	-0.396132	0.067713	1.83481	2.99265	-1.15784	0.00229749	0	0
AREG	P15514	ONC	1.24599	1.45931	-0.213324	0.0678323	0.54744	0.705024	-0.157584	0.616452	0	0
GNE	Q9Y223	ONC	0.692891	0.846459	-0.153569	0.068135	1.41677	1.9518	-0.535028	0.0238516	0	0
MCAM	P43121	CAR	1.23208	1.06574	0.166332	0.0685229	0.558705	0.266824	0.291881	0.0314859	0	0
ANGPT2	O15123	ONC	1.30913	1.531	-0.221863	0.069354	0.535897	1.36736	-0.831458	9.03617e-06	0	0
PADI2	Q9Y2J8	INF	0.480994	0.634216	-0.153221	0.0697992	0.564209	0.552121	0.0120874	0.532807	0	0
PGF	P49763	INF	1.42257	1.59207	-0.169498	0.0703203	0.658969	1.16854	-0.509576	0.00624465	0	0
F9	P00740	CAR	0.568837	0.702704	-0.133867	0.0705259	0.400482	0.804262	-0.40378	0.000758161	0	0
APRT	P07741	NEU	2.81697	3.10814	-0.291168	0.0705444	4.19666	4.86343	-0.666766	0.00220257	0	0
ITGA5	P08648	NEU	0.703515	0.858722	-0.155207	0.0713492	1.13154	1.51849	-0.386945	0.00109725	0	0
LAT	O43561	INF	3.33522	3.52882	-0.1936	0.0713492	4.57742	5.39049	-0.813068	0.0116662	0	0
FABP2	P12104	CAR	0.923005	0.519682	0.403323	0.0714191	0.614582	0.435745	0.178837	0.567015	0	0
ITGB7	P26010	ONC	1.18004	0.982986	0.197055	0.0714906	1.10976	1.08704	0.0227208	0.736655	0	0
TIMP3	P35625	INF	6.54861	7.15409	-0.60548	0.071978	2.4478	3.76462	-1.31682	0.11326	0	0		1.9e-05
ITM2A	O43736	INF	0.441061	0.273637	0.167424	0.0722015	-0.402069	0.011094	-0.413163	0.00248659	0	0
HSPG2	P98160	CAR	1.03162	1.22358	-0.191958	0.072576	0.599822	0.856683	-0.256862	0.286519	0	0
WWP2	O00308	NEU	0.672132	0.872245	-0.200113	0.0729448	0.0615743	0.591755	-0.530181	0.000437826	0	0
IL20RA	Q9UHF4	INF	0.393833	0.585119	-0.191285	0.0730135	0.154995	0.312961	-0.157966	0.601464	0	0
FGFR2	P21802	ONC	0.826862	0.973851	-0.14699	0.0731575	0.166554	0.521283	-0.354729	0.00850635	0	0
EGFL7	Q9UHF1	ONC	1.59013	1.84459	-0.254456	0.0734097	-0.203629	0.365747	-0.569376	0.00686088	0	0
DPP6	P42658	ONC	1.37445	1.17795	0.196509	0.0741618	0.659921	0.576686	0.0832343	0.769218	0	0
CC2D1A	Q6P1N0	NEU	3.00454	3.52862	-0.524082	0.0741712	1.87486	2.99648	-1.12162	0.000125445	0	0
SULT1A1	P50225	NEU	3.28473	3.73901	-0.454272	0.0747193	4.76466	5.71709	-0.952425	0.0533044	0	0
HSP90B1	P14625	NEU	-0.307261	-0.107197	-0.200065	0.0749543	-0.653312	-0.425782	-0.22753	0.226919	0	0
SDC4	P31431	CAR	2.51736	2.73456	-0.2172	0.0751469	-0.560474	0.496866	-1.05734	0.00290082	0	0
STX4	Q12846	ONC	2.07517	2.43287	-0.357699	0.0752622	0.545691	1.46739	-0.921696	0.00227957	0	0
EIF4B	P23588	NEU	1.53682	1.89963	-0.362811	0.0754134	3.4757	4.68396	-1.20827	3.02432e-05	0	0
TGFBI	Q15582	CAR	0.997172	1.137	-0.139825	0.0757441	0.309143	0.576407	-0.267264	0.11326	0	0		1.14e-05
SEZ6L	Q9BYH1	ONC	1.34421	1.25366	0.0905566	0.0765927	0.663599	0.649954	0.013645	0.567015	0	0
SPINK1	P00995	NEU	1.46908	1.85019	-0.381116	0.0777843	1.08471	2.11903	-1.03432	0.0306375	0	0
RRM2B	Q7LG56	ONC	1.10044	1.36378	-0.263338	0.0778673	0.435658	1.17283	-0.737177	0.0216809	0	0
CNTN5	O94779	NEU	0.971305	0.804042	0.167262	0.0779029	0.496521	0.160811	0.33571	0.14697	0	0
CD8A	P01732	NEU	1.6715	1.39902	0.272482	0.080086	1.33938	1.4944	-0.155018	0.447884	0	0
SORCS2	Q96PQ0	ONC	0.745419	1.02218	-0.276758	0.0801771	0.297016	1.05614	-0.75912	0.00154027	0	0		0.000355
CXCL14	O95715	INF	-0.251523	-0.150583	-0.10094	0.0812247	0.252852	0.343671	-0.0908192	0.25668	0	0
CASP8	Q14790	ONC	4.07164	4.38833	-0.316695	0.0817826	3.71213	4.62312	-0.91099	0.00624465	0	0	0.000125
SMAD5	Q99717	ONC	0.803316	0.890337	-0.087021	0.082147	0.275174	0.644258	-0.369084	0.00551234	0	0
CD1C	P29017	ONC	0.699888	0.590524	0.109364	0.0826095	0.330213	0.0561896	0.274023	0.0714266	0	0
TNNI3	P19429	CAR	0.0983955	-0.135684	0.23408	0.0847418	-0.699714	-0.249903	-0.449811	0.0662673	0	0
CCL4	P13236	INF	1.97954	2.25373	-0.274199	0.085985	0.220717	0.855748	-0.635031	0.000254077	0	0
CGA	P01215	NEU	2.56286	2.9322	-0.369344	0.0870915	1.92923	2.49786	-0.568631	0.360247	0	0
PIK3IP1	Q96FE7	NEU	0.976992	1.15537	-0.178378	0.0870915	0.499956	0.910303	-0.410347	0.00693856	0	0
IL15RA	Q13261	INF	1.04849	1.24187	-0.193379	0.0871034	0.241083	0.679643	-0.43856	0.00380513	0	0
CHRDL1	Q9BU40	INF	0.86094	1.09186	-0.230923	0.0873618	0.716687	1.02052	-0.303836	0.242576	0	0
IGFBP1	P08833	CAR	1.60567	2.15905	-0.553377	0.0883357	1.52195	1.77882	-0.256879	0.54618	0	0
FABP9	Q0Z7S8	INF	1.24253	0.976134	0.266396	0.0886427	0.864112	0.546022	0.318089	0.193789	0	0
PEAR1	Q5VY43	CAR	1.08594	1.00775	0.0781931	0.0907969	0.479007	0.508676	-0.0296689	0.485983	0	0
PEBP1	P30086	NEU	1.97728	2.19279	-0.215512	0.0908055	2.03177	3.12746	-1.09569	1.88637e-05	0	0
IL16	Q14005	INF	2.21533	2.41755	-0.202216	0.0908055	0.343601	0.86241	-0.518808	0.00559768	0	0
FSTL3	O95633	INF	1.44093	1.65264	-0.211717	0.0915961	0.706154	1.29959	-0.593437	0.0106596	0	0		0.000165
PTPN1	P18031	NEU	2.93383	3.3223	-0.38847	0.0916861	1.61262	2.48932	-0.876697	0.00150931	0	0
BMP4	P12644	NEU	0.671345	0.918337	-0.246992	0.0916861	1.26104	0.879472	0.381568	0.101776	0	0
NCLN	Q969V3	INF	0.209781	0.454287	-0.244505	0.0917339	0.172253	0.183883	-0.0116297	0.853133	0	0
PRTN3	P24158	CAR	2.48523	2.86901	-0.383778	0.0920481	0.275572	1.07347	-0.797893	0.000128323	0	0
EIF4EBP1	Q13541	CAR	2.03366	2.52253	-0.488874	0.0923208	2.70812	4.21832	-1.5102	6.9457e-06	0	0
SCP2	P22307	ONC	0.965581	1.22045	-0.25487	0.0925738	1.22029	0.861176	0.359111	0.601464	0	0
AZU1	P20160	CAR	3.9669	4.41099	-0.444094	0.0926781	-0.0194598	0.840799	-0.860259	0.000426973	0	0
APBB1IP	Q7Z5R6	ONC	2.3726	2.75877	-0.386167	0.0934253	0.0230107	0.724607	-0.701596	0.00131594	0	0
ADGRG2	Q8IZP9	CAR	0.974599	0.856969	0.117629	0.0949194	0.586558	0.228178	0.35838	0.145311	0	0
PCDH1	Q08174	INF	0.708411	0.771023	-0.0626119	0.0952975	0.17845	0.533737	-0.355287	7.52375e-05	0	0
LEFTY2	O00292	ONC	3.04194	2.70557	0.336369	0.0959598	1.5313	1.38577	0.145533	0.531768	0	0
IL13RA1	P78552	ONC	0.940926	1.0831	-0.142178	0.0971969	0.422828	0.697767	-0.274939	0.00768782	0	0
LAMA4	Q16363	INF	1.09614	1.29252	-0.196386	0.0974968	0.470926	0.647176	-0.176251	0.40814	0	0
ALDH1A1	P00352	NEU	1.07886	1.28384	-0.204978	0.0986152	0.835188	1.67382	-0.838634	0.000964236	0	0
CDC37	Q16543	ONC	1.09862	1.22415	-0.125532	0.0986192	2.08291	3.00685	-0.923948	0.00141333	0	0
S100A12	P80511	ONC	4.00731	4.46086	-0.453546	0.0988211	-0.722147	0.428602	-1.15075	0.000851341	0	0
VAMP5	O95183	CAR	0.854308	1.04748	-0.193167	0.0998756	0.714241	0.768615	-0.0543734	0.108911	0	0
ENPP5	Q9UJA9	INF	0.305415	0.118022	0.187393	0.100558	-0.55414	-0.925388	0.371248	0.0376259	0	0
SEMA4D	Q92854	NEU	1.48053	1.61151	-0.130981	0.100714	0.417853	0.88062	-0.462768	0.00325185	0	0
FMR1	Q06787	ONC	0.267444	0.413269	-0.145824	0.100722	0.187276	0.233346	-0.0460706	0.749075	0	0
NID2	Q14112	NEU	2.69419	3.02042	-0.326237	0.101335	0.0811238	0.712767	-0.631643	0.0151801	0	0
FKBP7	Q9Y680	NEU	0.617251	0.745053	-0.127802	0.101395	0.81461	1.09524	-0.280625	0.0526769	0	0
PPME1	Q9Y570	ONC	2.65443	2.9113	-0.256867	0.101611	3.80496	4.70386	-0.898904	0.00876243	0	0
CXCL3	P19876	INF	4.66537	4.96782	-0.302445	0.102119	4.28726	5.06363	-0.776371	0.0196789	0	0
PADI4	Q9UM07	NEU	3.396	3.92995	-0.533956	0.102249	0.674165	0.970693	-0.296527	0.0662673	0	0
MATN3	O15232	NEU	1.5006	1.71273	-0.212124	0.102412	0.805923	1.22136	-0.415438	0.05693	0	0
DPP10	Q8N608	INF	1.66265	1.52617	0.136477	0.102857	1.00612	0.879771	0.12635	0.433718	0	0
TEK	Q02763	ONC	0.928487	1.05095	-0.122466	0.102986	0.323981	0.661411	-0.33743	0.00453947	0	0
CHL1	O00533	CAR	1.26444	1.16368	0.10076	0.103942	0.73376	0.579167	0.154593	0.40814	0	0
DNAJB8	Q8NHS0	CAR	0.889833	1.026	-0.136163	0.104814	0.184801	0.494116	-0.309315	0.0116662	0	0
IL18RAP	O95256	NEU	1.44048	0.953628	0.486848	0.105654	1.70597	1.27208	0.433897	0.531768	0	0
GDF2	Q9UK05	CAR	1.55372	1.35156	0.202162	0.105904	0.57145	0.0905783	0.480872	0.0664918	0	0
WASF1	Q92558	CAR	0.657737	0.860758	-0.203021	0.106503	1.14001	1.61495	-0.474941	0.0248256	0	0
CCN3	P48745	CAR	1.04201	1.20329	-0.161276	0.106744	0.461696	0.923831	-0.462136	0.0332712	0	0
OGN	P20774	NEU	0.564375	0.956893	-0.392518	0.106952	1.52127	1.84589	-0.32462	0.219181	0	0		0.000404
TBCC	Q15814	NEU	2.02894	2.22617	-0.197232	0.107305	3.15473	4.18917	-1.03444	0.000204157	0	0
ANGPTL7	O43827	ONC	1.07612	0.973787	0.102334	0.107457	-0.126068	0.102693	-0.228761	0.531768	0	0
SULT2A1	Q06520	INF	1.06503	1.26238	-0.197357	0.107979	0.620027	0.61443	0.00559654	0.649654	0	0
LY75	O60449	INF	1.64162	1.48296	0.158663	0.107979	0.811719	0.892382	-0.0806627	0.500892	0	0
TNFRSF13B	O14836	INF	0.988014	1.17218	-0.184169	0.10855	0.419766	0.829373	-0.409608	0.0196789	0	0
DUSP3	P51452	NEU	0.770808	1.05457	-0.283761	0.109278	0.91024	0.957963	-0.0477227	0.412935	0	0
IGFBPL1	Q8WX77	CAR	1.24415	1.40646	-0.16231	0.109536	0.621291	1.04958	-0.428289	0.138306	0	0
CTSB	P07858	CAR	1.40898	1.63913	-0.230148	0.109606	0.711552	1.19975	-0.488199	0.0360904	0	0
ZBTB16	Q05516	ONC	0.85184	1.05933	-0.207492	0.11094	1.01997	1.61776	-0.597789	0.00858026	0	0
C2CD2L	O14523	NEU	1.65934	1.91255	-0.253202	0.111094	0.23302	0.544159	-0.311138	0.038165	0	0
SUSD2	Q9UGT4	NEU	0.836209	0.740209	0.0960004	0.111324	0.127519	0.198218	-0.0706991	0.938426	0	0
CNTN2	Q02246	ONC	1.4939	1.28259	0.211303	0.113601	0.581473	0.540006	0.0414675	0.88545	0	0
F3	P13726	ONC	1.23792	1.07851	0.159405	0.113601	0.637891	0.647331	-0.00943961	0.688843	0	0
DNAJA2	O60884	INF	4.24965	4.62515	-0.375506	0.114318	3.63004	5.11012	-1.48008	0.000377601	0	0
DRG2	P55039	ONC	0.998348	1.14597	-0.147621	0.114948	1.26818	1.99018	-0.722005	0.00260146	0	0
CRELD2	Q6UXH1	INF	1.99053	2.24483	-0.2543	0.115298	1.44946	2.42314	-0.97368	0.00154027	0	0
MAEA	Q7L5Y9	ONC	1.25294	1.34107	-0.0881397	0.115562	0.797277	1.17962	-0.382341	0.0262019	0	0
HARS1	P12081	NEU	1.70245	1.83446	-0.132013	0.115838	2.40175	3.40758	-1.00583	0.00064721	0	0
AKT1S1	Q96B36	NEU	2.70698	2.97855	-0.271561	0.116683	3.38153	4.8742	-1.49267	1.96507e-07	0	0
ATP6V1F	Q16864	NEU	1.67765	1.93129	-0.253642	0.116683	1.95013	2.88801	-0.937875	0.000506518	0	0
CEP43	O95684	CAR	1.40914	1.63813	-0.22899	0.117091	0.869361	1.66432	-0.794955	0.000584743	0	0
DPP4	P27487	CAR	0.636691	0.42549	0.211201	0.118555	0.1919	-0.380562	0.572462	0.00336354	0	0
DCTN6	O00399	NEU	0.649233	0.827859	-0.178626	0.118595	0.341133	1.04137	-0.700234	0.0116662	0	0
NTF4	P34130	ONC	0.737507	0.607703	0.129804	0.120333	0.310703	0.408361	-0.0976584	0.447697	0	0
AMN	Q9BXJ7	INF	0.717874	1.03416	-0.316288	0.12084	0.358874	0.407248	-0.0483741	0.879616	0	0
TYRO3	Q06418	CAR	1.30467	1.15689	0.147789	0.122627	0.685066	0.55946	0.125606	0.243732	0	0
HK2	P52789	CAR	0.236582	0.33439	-0.0978085	0.122686	0.0169692	0.0885711	-0.0716019	0.450741	0	0
CTSD	P07339	CAR	0.253235	0.431382	-0.178147	0.12324	-0.189995	-0.0255424	-0.164452	0.16905	0	0
NOTCH1	P46531	CAR	1.19268	1.11885	0.0738276	0.124034	0.558913	0.560608	-0.00169503	0.653844	0	0
AARSD1	Q9BTE6	ONC	2.97246	3.24854	-0.276088	0.12458	3.37055	4.43146	-1.06091	0.000851341	0	0
PRTG	Q2VWP7	ONC	1.04966	0.935053	0.11461	0.125015	0.349839	0.37062	-0.0207812	0.936213	0	0
HCLS1	P14317	INF	2.87966	3.12922	-0.24956	0.125294	2.47161	3.37448	-0.902873	0.000584743	0	0
ADH4	P08319	CAR	-0.0854601	0.298638	-0.384098	0.126531	-1.197	-0.780278	-0.416723	0.226919	0	0
OBP2B	Q9NPH6	NEU	0.57427	1.02872	-0.454454	0.126843	-0.485976	0.66586	-1.15184	0.00101722	0	0
FASLG	P48023	INF	0.961423	0.779493	0.18193	0.126927	0.782628	0.365398	0.41723	0.0414405	0	0
IKZF2	Q9UKS7	ONC	0.355294	0.649958	-0.294664	0.126935	0.0248759	0.392105	-0.367229	0.578151	0	0
DIABLO	Q9NR28	CAR	1.64673	1.83667	-0.189941	0.127529	2.62553	3.5808	-0.955266	0.00693856	0	0
CRKL	P46109	INF	4.03513	4.42639	-0.391254	0.127897	4.75924	6.02784	-1.2686	0.00154027	0	0
PRSS2	P07478	CAR	1.63649	1.87887	-0.242376	0.12971	1.19444	1.79885	-0.604418	0.0847406	0	0
NSFL1C	Q9UNZ2	NEU	3.33853	3.62967	-0.291136	0.130174	3.53551	4.94588	-1.41037	3.29525e-05	0	0
THY1	P04216	NEU	1.34964	1.45579	-0.106151	0.130174	0.812518	1.21921	-0.40669	0.0281797	0	0
AKR1C4	P17516	CAR	0.327803	0.466982	-0.13918	0.130469	0.360951	0.426198	-0.0652468	0.835141	0	0
PAK4	O96013	NEU	0.392499	0.516222	-0.123723	0.130585	-0.0972938	0.209207	-0.306501	0.0188907	0	0
XPNPEP2	O43895	ONC	0.803392	0.601473	0.201918	0.130706	0.285772	0.00414341	0.281628	0.525722	0	0
PCSK9	Q8NBP7	CAR	1.20854	1.42928	-0.220745	0.131368	1.49769	1.26511	0.232582	0.360247	0	0
TPSAB1	Q15661	INF	-0.0884856	0.111947	-0.200432	0.131925	-0.275182	-0.308698	0.0335162	0.88545	0	0
GCG	P01275	ONC	-0.397213	0.0140676	-0.411281	0.132069	-0.350933	-0.235972	-0.11496	0.853133	0	0
BCL2L11	O43521-2	INF	0.792168	1.09774	-0.305573	0.132541	0.516382	1.16399	-0.647613	0.0197222	0	0
MET	P08581	CAR	1.26741	1.37543	-0.108025	0.133043	0.784098	1.03005	-0.245949	0.0281797	0	0
SEMA4C	Q9C0C4	ONC	2.13973	2.27124	-0.131504	0.133077	1.36734	1.47993	-0.112586	0.592293	0	0
KYAT1	Q16773	CAR	1.92848	2.05686	-0.128376	0.133438	2.31766	2.8878	-0.570144	0.00850635	0	0
NME3	Q13232	INF	1.15289	0.990539	0.162347	0.133613	0.360442	0.327594	0.0328472	0.906231	0	0
ACE2	Q9BYF1	CAR	0.464923	0.770623	-0.3057	0.134502	-0.1986	0.201168	-0.399769	0.0295953	0	0
EGF	P01133	INF	5.27797	5.69201	-0.414039	0.135562	2.21421	3.42778	-1.21357	0.00767905	0	0
CKMT1B/NA	P12532/CKMT1A	INF	-1.30365	-0.692755	-0.610896	0.135562	0.202413	0.474256	-0.271843	0.673743	0	0
LAMP2	P13473	NEU	0.937261	0.917999	0.0192622	0.135956	0.660786	0.562954	0.0978314	0.256687	0	0
BOC	Q9BWV1	CAR	1.16353	1.08475	0.078775	0.136553	0.467966	0.481717	-0.0137506	1	0	0
DNAJB1	P25685	ONC	1.94854	2.31699	-0.368454	0.1366	2.75603	4.51894	-1.76291	2.96126e-06	0	0
IKBKG	Q9Y6K9	INF	3.51044	3.7844	-0.27396	0.136675	2.07606	2.92541	-0.849351	0.0159126	0	0
S100A16	Q96FQ6	NEU	1.07753	1.51456	-0.437026	0.136923	0.513695	0.657189	-0.143494	0.88545	0	0
HS6ST1	O60243	ONC	1.37185	1.24669	0.125157	0.137304	0.121481	0.433731	-0.31225	0.0950083	0	0
SERPINA12	Q8IW75	CAR	0.769455	0.433519	0.335936	0.137789	-0.221916	-0.11258	-0.109336	0.185682	0	0
WNT9A	O14904	INF	-0.0541682	0.144399	-0.198567	0.138428	0.218179	0.761075	-0.542896	0.00336354	0	0		0.000106
BSG	P35613	INF	0.797082	0.934899	-0.137818	0.138824	0.160531	0.378794	-0.218264	0.101776	0	0
IL17RA	Q96F46	NEU	1.09456	1.2834	-0.188842	0.139706	0.581091	0.912922	-0.331831	0.0533044	0	0
RTBDN	Q9BSG5	ONC	1.0375	1.19404	-0.156532	0.140193	0.503383	0.767611	-0.264228	0.120462	0	0
ROBO2	Q9HCK4	NEU	1.10573	1.03647	0.0692685	0.140207	0.510647	0.555804	-0.0451562	0.913876	0	0
GP6	Q9HCN6	NEU	3.47428	3.77826	-0.303974	0.140592	2.30518	3.36865	-1.06347	0.00325185	0	0
PILRA	Q9UKJ1	NEU	1.32323	1.47844	-0.155215	0.140593	0.610824	1.18914	-0.578312	0.010372	0	0
GNLY	P22749	NEU	0.758415	0.8986	-0.140185	0.140593	-0.165851	0.318494	-0.484345	0.0258891	0	0
CHEK2	O96017	CAR	-0.0131291	0.0754537	-0.0885829	0.140729	-0.0466354	-0.0762458	0.0296104	0.78548	0	0
DEFA1B/NA	P59665/DEFA1	CAR	0.951018	1.23314	-0.282118	0.141663	0.0873179	0.521506	-0.434188	0.00858026	0	0
AMBN	Q9NP70	INF	0.0263815	-0.110818	0.1372	0.142839	0.0419952	-0.0467807	0.0887759	0.286519	0	0
TRAF2	Q12933	INF	2.16822	2.40683	-0.238609	0.143066	1.24334	2.06358	-0.820234	0.00708369	0	0
PILRB	Q9UKJ0	CAR	1.35485	1.52264	-0.167798	0.143152	0.612395	1.18068	-0.56828	0.0182253	0	0
CERT	Q9Y5P4	NEU	2.47409	2.75939	-0.285308	0.143495	2.20403	2.92434	-0.720306	0.00559768	0	0
VTA1	Q9NP79	NEU	0.684075	0.924369	-0.240294	0.14368	1.17556	2.19306	-1.01751	0.000564523	0	0
STIP1	P31948	NEU	1.55325	1.64427	-0.0910205	0.14418	2.23901	3.43518	-1.19617	3.29525e-05	0	0
MAP3K5	Q99683	ONC	3.01964	3.34645	-0.326817	0.14467	0.9167	1.70153	-0.784827	0.00664209	0	0
TBCB	Q99426	NEU	3.29414	3.65516	-0.361023	0.144802	5.40443	6.67588	-1.27145	0.00077438	0	0
ICAM2	P13598	CAR	1.62128	1.73612	-0.114838	0.14523	0.934375	1.18995	-0.255574	0.0618335	0	0
TNFSF12	O43508	INF	2.52108	2.70631	-0.185232	0.145999	0.581483	0.957852	-0.376368	0.0449436	0	0
RANGAP1	P46060	ONC	0.174842	0.279316	-0.104475	0.146545	-0.0655159	0.0888243	-0.15434	0.191489	0	0
DOK2	O60496	CAR	2.42911	2.74419	-0.315081	0.146815	3.48732	4.7666	-1.27927	0.00850635	0	0
SH2B3	Q9UQQ2	ONC	1.13074	1.33995	-0.209218	0.148436	2.34972	3.55644	-1.20672	0.00101348	0	0
ENTPD5	O75356	CAR	0.896161	0.960915	-0.0647541	0.149378	0.685182	0.758903	-0.0737214	0.450741	0	0
HYAL1	Q12794	CAR	1.33962	1.24187	0.097753	0.150706	0.691401	0.716467	-0.0250661	0.82681	0	0
CD93	Q9NPY3	CAR	1.18436	1.33903	-0.154672	0.150707	0.503471	0.837165	-0.333695	0.0287428	0	0
NMNAT1	Q9HAN9	NEU	3.91023	4.27387	-0.363643	0.153383	0.648207	1.30072	-0.652511	0.00695584	0	0
CLTA	P09496	CAR	1.84254	2.01459	-0.17205	0.15385	2.1898	2.68494	-0.495144	0.0526769	0	0
CDON	Q4KMG0	INF	0.771386	0.697233	0.0741524	0.154102	-0.0151437	0.0800713	-0.095215	0.402888	0	0
BGN	P21810	ONC	-2.59523	-2.37397	-0.221255	0.154223	0.948625	0.580039	0.368586	0.42766	0	0
GZMA	P12544	INF	1.18609	1.32843	-0.142338	0.154406	0.486106	0.888602	-0.402497	0.0116662	0	0
CRNN	Q9UBG3	ONC	1.49921	1.25819	0.241015	0.154449	0.918641	0.749085	0.169556	0.66537	0	0
VCAN	P13611	NEU	1.29295	1.46806	-0.17511	0.154497	0.845157	1.05937	-0.214215	0.243732	0	0
NOMO1	Q15155	NEU	1.0923	1.2235	-0.131198	0.155362	0.458607	0.80612	-0.347513	0.00325185	0	0
MAGED1	Q9Y5V3	ONC	0.530585	0.541653	-0.0110679	0.15619	0.535972	0.874639	-0.338667	0.00134262	0	0
JCHAIN	P01591	INF	1.43411	1.20881	0.225293	0.156722	0.84953	1.0868	-0.237266	0.352761	0	0
PGLYRP1	O75594	CAR	1.57754	1.81094	-0.233397	0.158253	0.30831	0.857662	-0.549352	0.0166434	0	0
BMP6	P22004	CAR	0.252991	0.547271	-0.29428	0.160749	0.0787027	0.483966	-0.405263	0.14134	0	0
ANXA11	P50995	INF	2.43292	2.76479	-0.331863	0.161223	3.65828	4.35865	-0.700368	0.00374289	0	0
PDLIM7	Q9NR12	INF	3.99161	4.49581	-0.504192	0.162936	3.58614	4.68147	-1.09533	0.0344428	0	0
IL5RA	Q01344	INF	1.67155	1.91023	-0.238683	0.16361	1.03356	1.65582	-0.62226	0.0736556	0	0
GLB1	P16278	NEU	3.10029	2.93357	0.166719	0.164645	1.74942	1.88345	-0.134035	0.596913	0	0
PDCD1	Q15116	ONC	0.748974	0.932514	-0.18354	0.16465	0.06205	0.556709	-0.494659	0.0188907	0	0
CLSTN1	O94985	NEU	1.12453	1.00036	0.124174	0.164665	0.295844	0.388019	-0.0921753	0.688843	0	0
VSTM2L	Q96N03	CAR	0.534676	0.265901	0.268776	0.165477	0.28597	0.0782697	0.2077	0.0662673	0	0
PCOLCE	Q15113	CAR	1.4392	1.29718	0.142018	0.166083	0.945773	0.81863	0.127143	0.673743	0	0
MDGA1	Q8NFP4	NEU	1.74673	1.50165	0.245085	0.166972	0.507252	0.588591	-0.081339	1	0	0
TNR	Q92752	NEU	1.00136	1.1206	-0.11924	0.166972	0.472478	0.555367	-0.082889	0.553088	0	0
NCF2	P19878	INF	2.96023	3.37048	-0.410251	0.168464	-0.842929	0.326533	-1.16946	0.00248659	0	0
NAAA	Q02083	NEU	1.20501	0.98242	0.222589	0.169323	0.142896	0.232358	-0.0894617	0.688843	0	0
SRP14	P37108	ONC	3.28015	3.66485	-0.384706	0.169501	0.210535	1.27578	-1.06525	1.01151e-05	0	0
CNST	Q6PJW8	CAR	1.41331	1.6356	-0.222294	0.170315	1.57396	2.41686	-0.842906	0.00325185	0	0
CST5	P28325	NEU	0.616164	0.850304	-0.23414	0.171698	0.0430557	0.586357	-0.543301	0.326808	0	0
ERBB3	P21860	INF	1.10483	1.25051	-0.145683	0.172146	0.512222	0.618254	-0.106032	0.468242	0	0
MAVS	Q7Z434	ONC	2.11949	2.38028	-0.260792	0.17368	1.55686	2.33484	-0.777981	0.0216809	0	0
PAM	P19021	CAR	1.8825	2.06263	-0.180131	0.1742	0.725171	1.05716	-0.331992	0.0618335	0	0
CDC27	P30260	ONC	0.384326	0.476806	-0.0924807	0.174753	0.066162	0.334034	-0.267872	0.0785768	0	0
CLPS	P04118	NEU	1.45538	1.74432	-0.288943	0.175447	0.799902	1.94044	-1.14054	0.00290082	0	0
GSTA3	Q16772	ONC	0.588302	0.894593	-0.306291	0.176914	-0.0565496	0.130308	-0.186857	0.723664	0	0
ARID4B	Q4LE39	NEU	0.696036	0.862755	-0.166719	0.177399	-0.0489813	0.28576	-0.334742	0.035106	0	0
AGR2	O95994	NEU	1.18135	1.65272	-0.471371	0.177401	1.36873	1.57366	-0.20493	0.66537	0	0
TREML2	Q5T2D2	NEU	1.58799	1.70463	-0.11664	0.177557	0.468001	0.843409	-0.375408	0.010372	0	0
ROR1	Q01973	CAR	1.09252	1.24084	-0.148315	0.178744	0.534449	0.785139	-0.25069	0.138306	0	0
SERPINB9	P50453	NEU	2.08195	2.19405	-0.112094	0.178972	2.17249	2.61827	-0.445778	0.00032494	0	0
PRKRA	O75569	ONC	2.09631	2.34315	-0.246836	0.179093	1.16146	1.85331	-0.691848	0.00380513	0	0
CHAC2	Q8WUX2	ONC	0.980881	1.06939	-0.0885086	0.179094	1.06912	1.9191	-0.849978	0.000107102	0	0
SMAD1	Q15797	ONC	0.754078	0.843461	-0.0893822	0.179094	0.806126	1.37855	-0.572421	0.00229671	0	0
SUMF2	Q8NBJ7	NEU	1.59768	1.73714	-0.139458	0.180038	1.02448	1.51208	-0.487592	0.0199329	0	0
CTSS	P25774	NEU	0.956644	1.04075	-0.0841026	0.180038	0.360132	0.693414	-0.333282	0.0125802	0	0
EDIL3	O43854	CAR	1.36679	1.21606	0.150732	0.180287	0.30366	0.193171	0.110489	0.531768	0	0
TNFSF14	O43557	NEU	3.77436	4.00114	-0.226777	0.181447	1.15855	2.05865	-0.900101	0.00150931	0	0
CES1	P23141	CAR	0.713885	1.0465	-0.332619	0.182609	0.519073	0.641124	-0.122051	0.588213	0	0
KLB	Q86Z14	NEU	1.12826	0.879938	0.248326	0.182695	0.200144	0.442694	-0.242549	0.470336	0	0
GYS1	P13807	CAR	2.61857	2.9498	-0.331224	0.182848	3.89389	4.97497	-1.08108	0.00316384	0	0
CD63	P08962	NEU	2.7716	2.92037	-0.148769	0.183948	0.880656	1.6393	-0.75864	0.00624465	0	0
PCDH17	O14917	CAR	0.556284	0.724452	-0.168168	0.185267	0.15439	0.59051	-0.43612	0.00850635	0	0
RUVBL1	Q9Y265	ONC	0.748618	0.764413	-0.0157949	0.185754	0.213885	0.772473	-0.558588	0.302258	0	0
SLAMF6	Q96DU3	ONC	1.02437	1.13665	-0.112281	0.188014	0.387131	0.755706	-0.368576	0.00116777	0	0
SFTPD	P35247	CAR	0.586051	0.376516	0.209535	0.189712	-0.21279	0.0373403	-0.25013	0.865038	0	0
GSAP	A4D1B5	ONC	-3.24992	-3.431	0.181084	0.190295	-3.73555	-3.77191	0.0363629	0.352761	0	0
HLA-E	P13747	INF	0.00677066	0.0844247	-0.077654	0.191648	0.52915	0.958694	-0.429544	0.00626124	0	0
CLIP2	Q9UDT6	INF	3.13455	3.37245	-0.237894	0.191648	5.29616	6.39512	-1.09895	0.00901242	0	0
NOTCH3	Q9UM47	CAR	1.31535	1.1828	0.13255	0.19354	0.45922	0.425862	0.0333571	0.609761	0	0
CASP3	P42574	CAR	3.23108	3.44113	-0.210055	0.19354	4.55333	5.52243	-0.969106	0.00141333	0	0
MANF	P55145	INF	4.35744	4.65327	-0.295831	0.194283	5.13906	6.61097	-1.4719	0.00858026	0	0
IFNLR1	Q8IU57	INF	1.32824	1.46729	-0.13905	0.197104	0.810931	1.06913	-0.258199	0.169437	0	0
ITGB5	P18084	ONC	1.15034	1.27798	-0.127635	0.198128	1.82558	2.08867	-0.263093	0.328354	0	0
MMP13	P45452	NEU	1.26725	1.47297	-0.205719	0.199281	-0.188025	0.272802	-0.460827	0.00171507	0	0
RNF41	Q9H4P4	ONC	1.69793	1.86131	-0.163377	0.199621	0.809824	1.5589	-0.74908	0.000877572	0	0
CD59	P13987	CAR	0.944683	1.04405	-0.0993691	0.200325	0.413952	0.763977	-0.350025	0.0152176	0	0
LHB	P01229	ONC	-2.24297	-2.01079	-0.232175	0.202004	-2.43556	-2.26149	-0.174069	0.723664	0	0
FAM3B	P58499	ONC	1.03051	1.1697	-0.139189	0.203178	0.708679	0.604241	0.104437	0.306396	0	0
VSIR	Q9H7M9	CAR	1.9872	2.19185	-0.20465	0.203519	0.58852	1.30071	-0.712191	0.00109725	0	0
MSR1	P21757	NEU	1.03847	1.2405	-0.202032	0.203997	0.240313	1.10462	-0.86431	0.000740571	0	0
UXS1	Q8NBZ7	ONC	0.549373	0.789126	-0.239753	0.204407	-0.296666	0.123388	-0.420055	0.0287428	0	0	0.000794
HPCAL1	P37235	INF	2.14878	2.32549	-0.176714	0.206732	3.31783	4.20806	-0.890225	0.00316384	0	0
ERP44	Q9BS26	ONC	0.550437	0.622025	-0.0715886	0.208013	0.535004	0.830477	-0.295472	0.0109329	0	0
CA4	P22748	CAR	1.06049	0.996142	0.0643479	0.209639	0.267404	0.411025	-0.143621	0.243732	0	0
MMP7	P09237	CAR	0.757147	0.797917	-0.0407702	0.209958	-1.92569	-0.79255	-1.13314	0.000673601	0	0
VIM	P08670	CAR	1.74069	1.91671	-0.17602	0.209958	0.814523	0.803148	0.0113753	0.574809	0	0
PSMD9	O00233	ONC	2.50161	2.65298	-0.151373	0.210463	1.97658	2.73949	-0.762911	0.0166852	0	0
SORD	Q00796	ONC	2.06408	2.37804	-0.313954	0.210565	3.11602	3.55254	-0.436519	0.071375	0	0
SLC27A4	Q6P1M0	NEU	0.955366	1.08916	-0.133795	0.210933	0.440614	0.955023	-0.514408	0.00150931	0	0
SOD1	P00441	CAR	0.762405	0.757243	0.00516208	0.212016	0.477731	0.92214	-0.44441	0.00229671	0	0
IGFBP3	P17936	CAR	0.934596	0.899075	0.0355203	0.212016	0.345937	0.327272	0.018665	0.986575	0	0
DBNL	Q9UJU6	INF	4.01983	4.39463	-0.374795	0.212897	4.32891	5.48096	-1.15205	0.00296763	0	0
LSP1	P33241	INF	3.02026	3.22629	-0.206028	0.214155	0.442469	1.18271	-0.740243	0.00161734	0	0
GOPC	Q9HD26	INF	1.84527	2.01283	-0.167557	0.214155	3.8575	4.73489	-0.877387	0.012747	0	0
MME	P08473	ONC	0.316302	0.613129	-0.296828	0.215423	-0.390188	-0.37345	-0.0167379	0.849464	0	0
TFF2	Q03403	INF	1.87283	1.69548	0.177349	0.215657	0.740622	1.05629	-0.315671	0.468242	0	0
LSM1	O15116	ONC	0.723513	0.61915	0.104363	0.216736	0.814545	0.946917	-0.132372	0.370684	0	0
CLEC4D	Q8WXI8	INF	2.89656	3.15047	-0.253903	0.217098	0.804585	1.72597	-0.921385	0.00215964	0	0
TACC3	Q9Y6A5	ONC	2.87635	3.09236	-0.216012	0.217934	3.37299	4.63169	-1.25869	0.00173947	0	0
CES2	O00748	ONC	1.12385	1.01059	0.113259	0.217934	0.0513027	-0.00455518	0.0558579	0.742951	0	0
CDH3	P22223	NEU	1.96345	2.07106	-0.107607	0.218005	0.940846	1.05585	-0.115007	0.466723	0	0
CRX	O43186	CAR	0.224413	0.0154908	0.208922	0.218632	-0.304676	0.0834911	-0.388167	0.038165	0	0
ACTN4	O43707	INF	0.754617	0.779386	-0.0247688	0.219483	0.289413	0.611858	-0.322445	0.0145843	0	0
TRIM5	Q9C035	INF	1.53169	1.6642	-0.132507	0.220069	1.21205	1.83028	-0.618233	0.0268614	0	0
AXIN1	O15169	INF	2.09998	2.33037	-0.230394	0.220069	2.19187	2.97034	-0.778475	0.017731	0	0
STAT5B	P51692	ONC	4.96001	5.27122	-0.311209	0.220466	6.30193	7.88024	-1.57831	0.000986621	0	0
KIFBP	Q96EK5	ONC	1.53231	1.73064	-0.198329	0.220466	2.61771	3.29215	-0.674441	0.0300138	0	0
NPY	P01303	ONC	0.395201	0.565128	-0.169927	0.220763	1.07992	1.95544	-0.875519	0.05693	0	0
ARG1	P05089	ONC	2.35885	2.54578	-0.186927	0.220764	1.26478	1.7989	-0.53412	0.071375	0	0
CES3	Q6UWW8	ONC	0.963891	1.20965	-0.245762	0.22302	0.375878	-0.0285909	0.404469	0.230777	0	0
CA9	Q16790	ONC	1.31394	1.59087	-0.276932	0.22337	0.371257	0.747345	-0.376088	0.253	0	0
SPRY2	O43597	INF	0.841911	1.03679	-0.194876	0.224126	2.17739	3.18943	-1.01204	0.00261325	0	0
AXL	P30530	CAR	0.704934	0.813708	-0.108774	0.224193	0.163326	0.557284	-0.393957	0.00611947	0	0
STK4	Q13043	CAR	0.956472	1.02055	-0.0640785	0.225578	1.69109	2.38293	-0.691846	0.0036398	0	0
CNPY4	Q8N129	ONC	2.02097	2.09088	-0.0699174	0.225594	1.89378	2.90419	-1.01042	0.00131594	0	0
KLRB1	Q12918	INF	1.27418	1.41069	-0.136512	0.226333	0.627039	0.979378	-0.35234	0.036335	0	0
EPHA1	P21709	INF	0.535428	0.645732	-0.110304	0.228398	-0.0830809	0.255452	-0.338533	0.0912771	0	0
AGRP	O00253	INF	1.20415	1.38559	-0.181442	0.228874	1.18784	2.30248	-1.11464	4.39618e-05	0	0
PTH1R	Q03431	INF	0.0878243	0.162459	-0.0746352	0.229156	-0.431136	-0.183295	-0.247841	0.220535	0	0
EFEMP1	Q12805	CAR	1.06196	1.17139	-0.109431	0.229201	0.472442	0.967824	-0.495383	0.0216809	0	0
IRAK1	P51617	INF	1.86359	2.02985	-0.166265	0.232025	1.36395	2.23725	-0.873297	0.000653433	0	0
ECE1	P42892	NEU	1.6711	1.59715	0.07395	0.232496	0.758633	0.890193	-0.13156	0.326808	0	0
CDHR1	Q96JP9	NEU	1.1964	0.974557	0.221839	0.232496	-0.0667054	-0.199571	0.132866	0.239716	0	0
PTPN6	P29350	INF	2.12773	2.37906	-0.251326	0.232763	3.51088	4.39499	-0.88411	0.0145843	0	0
DKK3	Q9UBP4	CAR	1.55669	1.51907	0.037616	0.234288	0.801068	0.988523	-0.187455	0.447884	0	0
IL10RA	Q13651	INF	0.467782	0.617551	-0.149769	0.236855	0.163005	0.414117	-0.251113	0.259878	0	0
NUB1	Q9Y5A7	INF	2.25248	2.43109	-0.17861	0.23851	2.17063	3.21307	-1.04244	0.00119913	0	0
PLA2G7	Q13093	NEU	0.692648	0.623472	0.0691761	0.239239	0.0579674	0.150792	-0.0928245	0.256687	0	0
ANPEP	P15144	CAR	0.705364	0.637218	0.0681452	0.239454	0.141349	0.047026	0.0943227	0.625181	0	0
GRK5	P34947	CAR	0.460948	0.538992	-0.0780439	0.239864	0.594083	0.65123	-0.0571474	0.431605	0	0
ENPP7	Q6UWV6	INF	0.730296	0.974491	-0.244195	0.241668	-0.360338	-0.0948381	-0.2655	0.625181	0	0
FAS	P25445	CAR	1.01045	1.03854	-0.0280915	0.242068	0.202001	0.727118	-0.525117	0.000564523	0	0
TDGF1	P13385	NEU	1.15092	1.69203	-0.541108	0.2422	-0.150952	0.0721699	-0.223122	1	0	0
PRSS27	Q9BQR3	CAR	1.86474	2.0127	-0.147958	0.243876	0.919433	0.87047	0.0489624	0.840795	0	0
CDKN2D	P55273	ONC	2.42737	2.74765	-0.320274	0.244209	3.56049	4.47926	-0.918772	0.00488709	0	0
IL32	P24001	INF	1.8387	1.70576	0.132939	0.244889	0.894887	0.748848	0.146039	0.433718	0	0
CD83	Q01151	INF	1.59059	1.69811	-0.107516	0.244892	0.748352	1.30024	-0.551884	0.024274	0	0
MAX	P61244	NEU	1.91092	2.22073	-0.309813	0.245498	2.48165	3.91439	-1.43274	0.00101722	0	0
RASSF2	P50749	ONC	2.098	2.38402	-0.286026	0.245724	-0.200866	0.120104	-0.32097	0.245714	0	0
KRT5	P13647	NEU	1.17925	1.08299	0.0962516	0.248826	0.0773345	0.50764	-0.430306	0.0486852	0	0
ANXA4	P09525	CAR	1.21925	1.36169	-0.142444	0.249293	1.38782	2.18947	-0.801644	0.000175675	0	0		0.000238
CHGB	P05060	NEU	1.56135	1.7386	-0.177251	0.250696	1.67774	2.18403	-0.506284	0.0574412	0	0
BID	P55957	INF	2.91859	3.1622	-0.243606	0.251394	1.40908	1.91131	-0.502233	0.118409	0	0
PPY	P01298	ONC	0.433729	0.840176	-0.406447	0.25153	-0.289811	0.653564	-0.943374	0.0941447	0	0
IL1RL1	Q01638	CAR	0.470387	0.72305	-0.252663	0.252721	-0.0750804	0.647278	-0.722358	0.000964236	0	0
MNDA	P41218	CAR	4.32907	4.73311	-0.404046	0.254792	0.68396	1.59837	-0.91441	0.000964236	0	0
CX3CL1	P78423	NEU	2.46769	2.37117	0.0965176	0.254979	0.982293	1.28687	-0.304576	0.281039	0	0
TFRC	P02786	CAR	0.704117	0.746351	-0.0422346	0.256798	1.98247	1.85219	0.130275	0.904882	0	0
ITGB1BP2	Q9UKP3	CAR	1.35617	1.53446	-0.178292	0.259188	4.16257	5.67439	-1.51183	0.00101722	0	0
PDGFRB	P09619	CAR	1.20674	1.10735	0.0993887	0.260922	0.660506	0.60665	0.0538565	0.699135	0	0
TNFSF10	P50591	INF	1.30273	1.42644	-0.123711	0.26095	0.553028	0.665399	-0.11237	0.266773	0	0
ARHGEF12	Q9NZN5	INF	2.09873	2.31397	-0.215246	0.261371	2.08687	3.14281	-1.05595	0.00248659	0	0
CD28	P10747	ONC	0.927123	1.05306	-0.125941	0.262634	0.226576	0.381056	-0.15448	0.389146	0	0
GRN	P28799	NEU	1.39984	1.46777	-0.0679344	0.263757	0.867365	1.23142	-0.36406	0.021774	0	0
PLXDC1	Q8IUK5	ONC	0.360608	0.332488	0.0281203	0.265528	0.232254	0.147451	0.0848028	0.51081	0	0
INPP1	P49441	ONC	1.10169	1.23229	-0.1306	0.266772	2.49485	3.04225	-0.5474	0.0204162	0	0
PDGFRA	P16234	CAR	1.16159	1.25415	-0.092556	0.267469	0.671027	0.935533	-0.264506	0.207576	0	0
ABHD14B	Q96IU4	NEU	3.64438	3.8895	-0.24512	0.267913	3.59148	4.40298	-0.811497	0.00559768	0	0
PFKFB2	O60825	ONC	3.67218	4.03028	-0.358102	0.268229	1.56543	2.71737	-1.15195	9.83351e-05	0	0
RAD23B	P54727	ONC	1.29702	1.37517	-0.078157	0.271383	1.39511	1.84974	-0.454639	0.00380513	0	0
HLA-DRA	P01903	INF	2.01145	2.16734	-0.155897	0.271618	2.05189	1.89115	0.160734	0.500892	0	0
CCL15	Q16663	CAR	1.41062	1.54558	-0.134969	0.272141	0.894647	1.1535	-0.25885	0.185682	0	0
IDI2	Q9BXS1	NEU	0.407904	0.534471	-0.126566	0.273011	0.166629	0.447708	-0.281079	0.470336	0	0
STAMBP	O95630	NEU	2.76761	2.90179	-0.134183	0.274544	3.12164	4.15172	-1.03008	0.000238943	0	0
GSTA1	P08263	CAR	0.327594	0.632458	-0.304864	0.274699	-0.0658695	-0.169635	0.103766	0.987674	0	0
CLEC11A	Q9Y240	NEU	1.39658	1.57315	-0.176572	0.275194	-0.075535	0.498637	-0.574172	0.0360904	0	0
CLUL1	Q15846	CAR	1.79049	1.90416	-0.113665	0.277627	1.25133	1.06724	0.184093	0.840795	0	0
NPM1	P06748	NEU	3.33008	3.59753	-0.267449	0.277904	0.792449	1.5115	-0.719049	0.00248943	0	0
NRP2	O60462	NEU	1.54564	1.69276	-0.147115	0.278104	0.750146	1.11747	-0.367329	0.021774	0	0
PTEN	P60484	NEU	0.345591	0.385836	-0.0402452	0.280204	0.387816	0.549692	-0.161876	0.108911	0	0
STK24	Q9Y6E0	NEU	0.766697	0.837485	-0.0707887	0.280206	0.91831	1.52627	-0.607958	0.00132582	0	0
SCARF2	Q96GP6	NEU	1.59028	1.76204	-0.171765	0.280914	0.824586	1.23519	-0.410606	0.0821686	0	0
SERPINB5	P36952	CAR	0.666866	0.755971	-0.0891046	0.283063	0.67932	0.58516	0.0941597	0.214603	0	0
XCL1	P47992	ONC	1.06144	1.09803	-0.0365869	0.283202	-0.0397277	0.651962	-0.69169	0.00077438	0	0
SUGT1	Q9Y2Z0	ONC	2.19316	2.28797	-0.0948054	0.283357	3.48354	4.58342	-1.09987	0.00116777	0	0
SPOCK1	Q08629	NEU	1.48887	1.40089	0.0879805	0.284705	0.60311	0.855628	-0.252518	0.101776	0	0		0.000472
CA13	Q8N1Q1	CAR	3.65595	3.95744	-0.301486	0.286539	5.14708	6.13573	-0.988657	0.00768782	0	0
DPT	Q07507	CAR	0.642666	0.538598	0.104068	0.286623	0.212635	0.405998	-0.193363	0.485983	0	0
TFF1	P04155	NEU	1.70397	1.48953	0.214435	0.286963	0.937518	1.47499	-0.537476	0.298303	0	0
SFRP1	Q8N474	NEU	1.63695	1.83928	-0.202334	0.288147	2.48432	2.67451	-0.190192	1	0	0
IL22RA1	Q8N6P7	INF	0.945623	0.872746	0.0728767	0.289102	0.592556	0.562756	0.0297997	0.904882	0	0
ITGB1BP1	O14713	ONC	0.861642	0.880692	-0.0190496	0.289476	1.06829	1.186	-0.117705	0.389146	0	0
EPCAM	P16422	INF	1.62889	1.87735	-0.248461	0.289779	1.40471	1.02154	0.38317	0.40814	0	0	0.00033
AMY2A	P04746	CAR	1.5596	1.40607	0.153527	0.292559	0.938137	1.26903	-0.330891	0.505652	0	0
COL9A1	P20849	INF	0.843707	0.711295	0.132411	0.292928	0.13255	0.0175555	0.114994	0.985518	0	0
NPPC	P23582	INF	0.927973	1.09058	-0.162604	0.292928	0.367986	0.787478	-0.419492	0.500892	0	0
IPCEF1	Q8WWN9	NEU	3.83708	4.13669	-0.299615	0.295114	2.20615	3.49255	-1.2864	0.000673601	0	0
AMY2B	P19961	CAR	1.55495	1.40353	0.151412	0.295557	0.902012	1.22821	-0.326194	0.466723	0	0
SH2D1A	O60880	INF	0.537013	0.641034	-0.104021	0.296586	0.568718	0.7838	-0.215082	0.281473	0	0
CNPY2	Q9Y2B0	CAR	0.349715	0.504931	-0.155216	0.297355	0.384938	0.432242	-0.0473039	0.412935	0	0
ANXA3	P12429	NEU	2.42252	2.74294	-0.32042	0.298399	1.73317	2.74936	-1.01619	0.00064721	0	0
FKBP1B	P68106	INF	2.50246	2.78205	-0.27959	0.299068	2.98522	4.03262	-1.0474	0.0172012	0	0
UBAC1	Q9BSL1	ONC	1.58809	1.7143	-0.126211	0.300075	1.89744	2.41263	-0.515186	0.00173947	0	0
DDX58	O95786	ONC	1.94753	2.06195	-0.11443	0.30198	0.681464	1.55783	-0.876363	0.000412258	0	0
SIRPA	P78324	CAR	0.929667	1.04865	-0.118987	0.304677	0.318253	0.589723	-0.27147	0.0494126	0	0
SPARCL1	Q14515	CAR	0.972708	1.09198	-0.119274	0.306213	0.419125	0.622008	-0.202883	0.51081	0	0
MGLL	Q99685	INF	2.2982	2.47943	-0.181232	0.30716	3.38148	4.01834	-0.63686	0.0621859	0	0
QPCT	Q16769	CAR	1.23549	1.3294	-0.093903	0.307757	0.435899	0.675363	-0.239464	0.100622	0	0
GPNMB	Q14956	CAR	0.968938	1.03001	-0.0610752	0.308077	0.391193	0.634198	-0.243004	0.14697	0	0
MYOC	Q99972	NEU	0.848391	0.761791	0.0866	0.308367	0.0164487	0.0270515	-0.0106028	0.913876	0	0
CD99L2	Q8TCZ2	NEU	1.2266	1.33179	-0.105198	0.309934	0.744101	1.01136	-0.267257	0.0457554	0	0
PMVK	Q15126	NEU	3.20646	3.55676	-0.350292	0.310269	6.86804	8.5758	-1.70776	0.000673601	0	0	0.00097
CCL21	O00585	INF	1.00487	1.11045	-0.105571	0.310717	1.24981	1.66008	-0.410269	0.048657	0	0
GUSB	P08236	CAR	1.4885	1.62116	-0.132664	0.310859	0.155516	0.705057	-0.549541	0.00562832	0	0
KLK1	P06870	ONC	0.842921	1.38506	-0.542137	0.310873	0.799689	0.626681	0.173007	0.963032	0	0
CD70	P32970	INF	2.03534	1.88108	0.154262	0.311523	0.551864	0.967337	-0.415473	0.0553603	0	0
CTSZ	Q9UBR2	CAR	1.00047	1.10404	-0.103566	0.313981	0.497306	0.90021	-0.402904	0.00176333	0	0
LY9	Q9HBG7	INF	1.36808	1.30283	0.0652469	0.314672	0.695082	0.878913	-0.183831	0.214603	0	0
FCAR	P24071	INF	1.83289	2.0193	-0.186408	0.315333	0.933852	1.14669	-0.212843	0.524415	0	0
RGMA	Q96B86	NEU	0.884545	0.816129	0.0684168	0.316596	0.467401	0.496231	-0.0288298	0.816697	0	0
RNASE3	P12724	CAR	7.81326	8.23907	-0.425813	0.317628	1.3693	2.55498	-1.18567	0.000320319	0	0
BIRC2	Q13490	ONC	0.991352	1.10133	-0.109977	0.318107	0.323394	0.699041	-0.375648	0.0528714	0	0
FLI1	Q01543	ONC	1.43007	1.54969	-0.119617	0.318107	1.63345	2.58645	-0.953003	0.000561839	0	0
CPE	P16870	ONC	0.777857	0.70292	0.0749374	0.31853	0.0693018	0.151765	-0.082463	1	0	0
CDH15	P55291	NEU	0.335033	0.254911	0.0801227	0.319698	-0.304452	-0.210601	-0.0938512	0.505652	0	0
CDSN	Q15517	INF	1.47843	1.38966	0.0887743	0.32106	0.533057	0.731693	-0.198636	0.51086	0	0
Q8NEV9/EBI3	Q14213	ONC	1.45451	1.56498	-0.110465	0.321879	0.647963	1.08125	-0.433284	0.00952765	0	0
PIK3AP1	Q6ZUJ8	INF	4.33356	4.62387	-0.290307	0.323045	2.43327	3.60885	-1.17558	0.000879762	0	0
GALNT10	Q86SR1	ONC	1.81774	1.90471	-0.0869655	0.325974	0.777596	1.1034	-0.325799	0.00697466	0	0		0.000569
NT5C3A	Q9H0P0	INF	3.68187	3.40878	0.273085	0.326947	4.74322	5.84779	-1.10457	0.00374289	0	0
ATP6V1D	Q9Y5K8	ONC	0.00718353	0.0789393	-0.0717558	0.32931	0.0311571	-0.0121857	0.0433429	0.641024	0	0
DCTN2	Q13561	ONC	3.22331	3.40889	-0.185579	0.32931	4.03894	4.75964	-0.720702	0.0711756	0	0
ATF2	P15336	NEU	0.780539	0.880609	-0.100071	0.330102	0.488668	0.899981	-0.411314	0.0526769	0	0
WFIKKN1	Q96NZ8	NEU	0.767942	0.840209	-0.072267	0.331636	0.249451	0.192518	0.0569331	0.860227	0	0
LRRC25	Q8N386	ONC	1.30815	1.41033	-0.102172	0.336046	0.41319	0.708512	-0.295321	0.0273183	0	0
VMO1	Q7Z5L0	ONC	0.987123	1.23796	-0.250842	0.336048	0.550475	0.873404	-0.322929	0.180391	0	0
SIRT5	Q9NXA8	NEU	0.596297	0.790857	-0.19456	0.33826	0.358379	0.592869	-0.23449	0.0486852	0	0
SLAMF7	Q9NQ25	INF	1.82496	1.96223	-0.137273	0.338835	1.09859	1.42714	-0.328555	0.0569808	0	0	0.000393
PVALB	P20472	ONC	3.94434	4.20669	-0.26235	0.338967	4.44655	5.06541	-0.618862	0.191394	0	0
CD2AP	Q9Y5K6	CAR	1.32015	1.43275	-0.112603	0.34066	2.15401	2.97205	-0.818036	0.00625359	0	0
ARSA	P15289	NEU	2.16868	2.26083	-0.0921476	0.340731	0.804807	1.36587	-0.56106	0.00229749	0	0
CLSTN2	Q9H4D0	INF	1.20819	1.12029	0.0878926	0.340731	0.705574	0.667128	0.0384461	0.820296	0	0
SRC	P12931	ONC	3.13117	3.37325	-0.242073	0.341973	3.53872	4.0337	-0.49498	0.243732	0	0
GHRHR	Q02643	NEU	0.53164	0.560403	-0.0287629	0.342388	0.194168	0.372836	-0.178668	0.359795	0	0
CASP2	P42575	INF	1.66815	1.84577	-0.17762	0.342857	1.04102	1.60484	-0.563821	0.024274	0	0	0.000289
TBC1D23	Q9NUY8	ONC	1.92187	2.06959	-0.147719	0.342874	1.80977	2.46076	-0.650986	0.0135501	0	0
HEBP1	Q9NRV9	CAR	1.02019	0.828615	0.19157	0.34308	0.467548	0.800053	-0.332505	0.0271228	0	0
NCK2	O43639	INF	0.681132	0.678884	0.0022475	0.343951	2.46292	3.66079	-1.19787	0.00101348	0	0
MMP10	P09238	INF	1.09201	1.29093	-0.198921	0.343951	-0.157894	-0.0792507	-0.078643	0.625181	0	0
IL7R	P16871	NEU	1.45409	1.28868	0.165407	0.344083	0.69321	0.651155	0.0420553	0.889406	0	0
ATP6AP2	O75787	ONC	1.25275	1.34525	-0.0925055	0.345064	0.109629	0.217324	-0.107695	0.51081	0	0
REG3A	Q06141	CAR	1.93936	1.78606	0.153297	0.346329	1.49651	1.89103	-0.394516	0.328354	0	0
CORO1A	P31146	CAR	3.07997	3.27751	-0.197539	0.346329	1.69728	2.36302	-0.665736	0.156032	0	0
BAX	Q07812	NEU	2.1587	2.36998	-0.211279	0.346547	2.58054	3.74113	-1.16059	0.015642	0	0
CASP10	Q92851	NEU	1.85553	2.07119	-0.215661	0.346547	0.333426	1.04038	-0.706959	0.0105504	0	0
CLSPN	Q9HAW4	NEU	0.417227	0.550022	-0.132795	0.346547	-0.0532454	0.0932994	-0.146545	0.0142048	0	0
CLEC10A	Q8IUN9	NEU	1.37697	1.2758	0.101171	0.347029	0.628137	0.948089	-0.319953	0.0486852	0	0
CLEC4A	Q9UMR7	INF	1.28435	1.15131	0.133041	0.350997	0.346551	0.272425	0.0741262	0.598121	0	0
GALNT3	Q14435	INF	1.53445	1.72273	-0.188273	0.354955	0.364152	0.821866	-0.457713	0.00134262	0	0
S100A4	P26447	ONC	2.00074	2.1172	-0.116462	0.356413	2.58944	3.343	-0.753557	0.00159986	0	0
CALCOCO1	Q9P1Z2	ONC	3.4954	3.78253	-0.287126	0.356627	2.43305	3.56913	-1.13607	0.00316384	0	0
SOST	Q9BQB4	CAR	1.06447	1.18204	-0.117573	0.357749	0.447529	0.850154	-0.402625	0.0199329	0	0
IFNGR2	P38484	NEU	1.09227	0.970772	0.121498	0.358868	0.580683	0.392483	0.188201	0.553088	0	0
CAPG	P40121	ONC	1.16732	1.28139	-0.11407	0.360227	-0.126775	0.57758	-0.704355	0.0188907	0	0
CHMP1A	Q9HD42	NEU	2.37771	2.50666	-0.128955	0.36287	3.28076	4.25446	-0.973694	0.00032494	0	0
CD200	P41217	INF	1.60816	1.52758	0.0805863	0.363432	1.03563	1.09923	-0.0635981	0.841711	0	0
LGMN	Q99538	INF	1.77764	1.93035	-0.152706	0.365337	0.275332	0.872185	-0.596853	0.00336354	0	0
DARS1	P14868	NEU	2.05847	2.14277	-0.0842975	0.3669	3.26635	4.21463	-0.948281	0.00399419	0	0
PSG1	P11464	NEU	-0.489633	-0.187845	-0.301788	0.3669	-1.46024	-0.43798	-1.02226	0.0767911	0	0
FST	P19883	INF	1.35612	1.47358	-0.117458	0.367323	0.422552	0.891822	-0.46927	0.048657	0	0
SPINK6	Q6UWN8	ONC	0.781351	0.948952	-0.167601	0.367496	0.235929	0.398	-0.162071	0.66537	0	0
CCL8	P80075	ONC	-1.62994	-1.60714	-0.0227953	0.367496	-3.88302	-2.88189	-1.00113	0.00132582	0	0
IDUA	P35475	ONC	0.0805896	-0.0229788	0.103568	0.371163	-0.757573	-0.511401	-0.246172	0.253	0	0
RILP	Q96NA2	ONC	3.04232	3.12138	-0.0790659	0.371164	4.28513	5.45255	-1.16742	0.000125445	0	0
CREG1	O75629	ONC	1.27195	1.39468	-0.122727	0.37123	0.218698	0.570076	-0.351378	0.000740571	0	0
FABP5	Q01469	NEU	1.95251	2.11085	-0.158341	0.372021	1.38129	2.38945	-1.00815	0.000740571	0	0
PRL	P01236	NEU	1.31841	1.55674	-0.238334	0.372022	1.42009	1.62685	-0.206759	0.676347	0	0
FOXO3	O43524	ONC	1.11309	1.21142	-0.0983209	0.373434	0.775452	1.78295	-1.0075	0.000254077	0	0
XG	P55808	CAR	1.45874	1.36556	0.0931797	0.373683	1.1151	1.14903	-0.0339307	0.72219	0	0
IL1RAP	Q9NPH3	NEU	0.471488	0.424554	0.0469341	0.375192	0.0309614	-0.220518	0.25148	0.107439	0	0
PARK7	Q99497	NEU	1.61936	1.71202	-0.0926605	0.375192	1.75234	3.01284	-1.2605	5.18414e-07	0	0
IL6ST	P40189	CAR	0.869113	0.917367	-0.048254	0.375369	0.453242	0.572592	-0.11935	0.37688	0	0
CCL19	Q99731	NEU	3.09576	3.02545	0.0703177	0.37546	2.54129	2.72078	-0.179488	0.298303	0	0
GP2	P55259	CAR	1.82598	2.00455	-0.178575	0.375933	1.52963	1.44859	0.0810338	0.961703	0	0
TRIM21	P19474	INF	2.95614	2.59655	0.35959	0.376139	3.05369	3.59213	-0.538445	0.043489	0	0
LY6D	Q14210	INF	0.965513	1.0846	-0.119089	0.379371	0.329059	0.648035	-0.318976	0.242576	0	0
NPTX1	Q15818	NEU	1.10098	1.16728	-0.0663054	0.38054	0.512425	0.672784	-0.160359	0.411498	0	0
CDH5	P33151	CAR	1.27395	1.21265	0.0612991	0.380725	0.610253	0.555829	0.0544236	0.745494	0	0
PIGR	P01833	NEU	0.914223	0.896809	0.0174142	0.382334	0.578385	0.660611	-0.0822261	0.816697	0	0
CPA2	P48052	NEU	1.66119	1.51428	0.146907	0.382394	1.17256	1.32462	-0.152068	0.114606	0	0
CRACR2A	Q9BSW2	ONC	3.09014	3.27557	-0.185436	0.388146	0.253095	0.921756	-0.668661	0.00380513	0	0
CFC1	P0CG37	ONC	1.1505	1.26132	-0.110823	0.388146	0.614432	0.826912	-0.21248	0.40814	0	0
MERTK	Q12866	INF	1.59532	1.53655	0.0587699	0.389557	0.782136	0.984954	-0.202818	0.394739	0	0
SIGLEC7	Q9Y286	CAR	1.14789	1.2373	-0.0894061	0.389844	0.562356	0.95145	-0.389095	0.010372	0	0
CRTAM	O95727	NEU	2.27946	2.4423	-0.162832	0.39166	1.65468	1.98999	-0.335308	0.180488	0	0
ASAH2	Q9NR71	NEU	0.74549	0.617538	0.127952	0.39166	0.193781	-0.033329	0.22711	0.78548	0	0
CEACAM21	Q3KPI0	INF	1.00515	1.13182	-0.126662	0.393503	0.564437	0.37682	0.187617	0.813406	0	0
ANXA5	P08758	NEU	0.614371	0.717289	-0.102918	0.394403	0.278915	0.880018	-0.601103	0.000673601	0	0
MILR1	Q7Z6M3	INF	1.67854	1.8204	-0.141852	0.394575	0.777814	1.24074	-0.462923	0.0912771	0	0
TNFAIP8	O95379	INF	0.686011	0.810353	-0.124342	0.394577	0.349206	0.478797	-0.129591	0.242576	0	0
MEGF10	Q96KG7	INF	1.09415	0.956408	0.13774	0.395809	-0.0427957	0.16736	-0.210155	0.352761	0	0
GGT5	P36269	NEU	0.938549	0.900235	0.0383141	0.395882	0.577549	0.666224	-0.0886753	0.858341	0	0
FCRL2	Q96LA5	INF	0.941878	0.839139	0.102739	0.396867	0.534585	0.625487	-0.0909019	0.736655	0	0
NFATC1	O95644	INF	2.15498	2.29674	-0.141757	0.397918	1.49818	2.19803	-0.699845	0.0159126	0	0
GZMB	P10144	INF	0.569328	0.393829	0.175499	0.397918	0.254343	0.573797	-0.319454	0.181319	0	0
SLC16A1	P53985	NEU	0.263996	0.350359	-0.0863629	0.398943	-0.0244933	0.68844	-0.712933	0.0449436	0	0
CCT5	P48643	ONC	0.611046	0.618309	-0.00726344	0.399408	1.14545	1.27741	-0.131959	0.00380513	0	0
GALNT7	Q86SF2	ONC	0.42978	0.403525	0.0262545	0.400635	0.489817	0.436593	0.0532236	0.665983	0	0
PM20D1	Q6GTS8	CAR	0.501713	0.303841	0.197872	0.40092	0.883826	-0.117184	1.00101	0.0941447	0	0
TNFRSF10C	O14798	CAR	1.37179	1.45556	-0.0837707	0.402335	0.653044	1.02064	-0.367596	0.243732	0	0
KRT14	P02533	NEU	0.439979	0.491798	-0.0518194	0.403515	0.209571	0.33054	-0.120969	0.239716	0	0
NXPH1	P58417	NEU	0.855677	0.96133	-0.105653	0.403515	0.473916	0.59524	-0.121324	0.810218	0	0
HYOU1	Q9Y4L1	CAR	1.11116	1.15762	-0.0464651	0.406007	0.715665	1.04777	-0.3321	0.0114303	0	0
PTN	P21246	CAR	1.11909	1.09208	0.0270101	0.40622	1.38513	2.23047	-0.845336	0.0248256	0	0
CRADD	P78560	NEU	3.50005	3.66485	-0.1648	0.408717	4.0166	5.20752	-1.19092	2.05237e-05	0	0
CLEC7A	Q9BXN2	INF	0.803747	0.856907	-0.0531598	0.411728	-0.0110218	0.525272	-0.536294	0.0248256	0	0
PLPBP	O94903	CAR	2.77093	2.83053	-0.0595978	0.412182	3.22454	4.27842	-1.05389	0.000276572	0	0
HMBS	P08397	ONC	2.00435	2.13392	-0.129572	0.413001	2.15654	2.77167	-0.615126	0.0295953	0	0
FCRL5	Q96RD9	NEU	1.08526	0.898883	0.186373	0.415494	0.247529	0.553072	-0.305543	0.207576	0	0
FGF2	P09038	INF	0.712605	0.79066	-0.0780545	0.415876	0.95812	1.43357	-0.475446	0.0218989	0	0
GH2	P01242	ONC	0.744364	1.18791	-0.443545	0.418609	-0.0658903	0.487385	-0.553275	0.11326	0	0
COMP	P49747	CAR	0.99576	0.928259	0.0675006	0.420892	0.126508	0.085735	0.0407731	0.906231	0	0
SIGLEC9	Q9Y336	ONC	0.849366	0.807343	0.042023	0.420897	0.220363	0.508874	-0.288511	0.101776	0	0
NTproBNP	NTproBNP	CAR	0.892892	1.01251	-0.119616	0.421708	0.38986	1.06222	-0.672364	0.328354	0	0
LYPD1	Q8N2G4	NEU	0.533601	0.703028	-0.169427	0.422111	0.520435	0.236743	0.283692	0.266773	0	0
ISLR2	Q6UXK2	NEU	1.47553	1.39748	0.0780484	0.422113	0.504146	0.712335	-0.20819	0.116424	0	0
IVD	P26440	NEU	-1.17239	-1.22809	0.0557032	0.422113	-1.25634	-1.05563	-0.200703	0.108911	0	0
BANK1	Q8NDB2	INF	3.22163	3.45191	-0.230276	0.425033	3.77007	4.61876	-0.848693	0.0218989	0	0
NFASC	O94856	INF	1.3015	1.38365	-0.0821558	0.426913	0.631544	0.778651	-0.147106	0.343055	0	0
IL33	O95760	INF	0.509737	0.635518	-0.125781	0.427168	0.297503	0.485638	-0.188135	0.148589	0	0
THPO	P40225	CAR	2.73566	2.85042	-0.114762	0.428719	0.921124	1.27983	-0.358708	0.038165	0	0
CCL22	O00626	INF	2.7602	2.96745	-0.207245	0.429947	0.824185	1.15931	-0.335127	0.242576	0	0
IL18	Q14116	INF	0.812998	0.931909	-0.118911	0.429947	0.197614	1.01662	-0.819009	0.000299379	0	0
CTRB1	P17538	NEU	1.82695	1.69579	0.131158	0.43076	1.26271	1.45456	-0.191847	0.938426	0	0
VSTM1	Q6UX27	NEU	1.0263	1.18295	-0.156655	0.431597	0.0147187	0.378633	-0.363914	0.101776	0	0
NOS1	P29475	NEU	-0.718281	-0.513754	-0.204527	0.431597	-1.24859	-0.66547	-0.583122	0.108911	0	0
WAS	P42768	INF	1.40328	1.49134	-0.0880573	0.431949	0.932383	0.743465	0.188918	0.879616	0	0
PRKAB1	Q9Y478	INF	1.32072	1.41847	-0.0977562	0.43195	0.704078	0.922281	-0.218203	0.16905	0	0
ADAMTS13	Q76LX8	CAR	0.702911	0.65536	0.0475519	0.432266	-0.602654	-0.822873	0.220219	0.231232	0	0
PDP1	Q9P0J1	ONC	0.136966	0.221695	-0.0847292	0.432366	-0.0317714	0.407963	-0.439734	8.92601e-05	0	0		0.00056
BAG3	O95817	NEU	0.456528	0.286421	0.170107	0.435116	0.127594	0.262747	-0.135153	0.936213	0	0
CELA3A	P09093	CAR	2.27911	2.40144	-0.122325	0.436096	1.8654	2.38845	-0.523044	0.270099	0	0
FGF19	O95750	INF	1.10066	1.25678	-0.156118	0.438744	0.42253	0.99466	-0.57213	0.130023	0	0
IL4	P05112	INF	1.14155	0.945444	0.196102	0.439178	0.277155	0.283195	-0.00603986	0.906231	0	0
MOG	Q16653	ONC	1.38238	1.35409	0.0282963	0.441021	0.688231	1.03564	-0.347409	0.2958	0	0
DGKZ	Q13574	INF	0.595793	0.669701	-0.0739086	0.441605	0.258962	0.363545	-0.104583	0.286519	0	0
KIR2DL3	P43628	ONC	1.1497	1.25896	-0.109254	0.442353	0.686371	1.12679	-0.440416	0.370684	0	0
CLEC1A	Q8NC01	CAR	1.5052	1.57573	-0.0705323	0.442559	0.580584	0.994122	-0.413538	0.0526769	0	0
ACAN	P16112	CAR	0.650392	0.583665	0.0667269	0.443118	0.151068	0.066751	0.0843171	0.525722	0	0
FAP	Q12884	CAR	0.569718	0.510598	0.0591207	0.443814	0.122899	-0.0176416	0.140541	0.447884	0	0
CCS	O14618	NEU	3.06495	3.13456	-0.0696171	0.44413	4.35523	5.1135	-0.758274	0.00132582	0	0
GPC5	P78333	NEU	2.48365	2.55543	-0.0717797	0.44413	0.76612	0.634952	0.131168	0.311056	0	0
ADAM22	Q9P0K1	NEU	1.45174	1.38875	0.0629879	0.44413	0.834135	0.867851	-0.0337162	0.712612	0	0
LTA	P01374	INF	1.24603	1.17358	0.072451	0.448432	0.671826	0.544527	0.127299	0.47244	0	0
BIN2	Q9UBW5	NEU	0.92857	0.99095	-0.0623801	0.450294	0.352889	0.693145	-0.340256	0.0114303	0	0
AIF1	P55008	ONC	0.906957	1.01867	-0.111711	0.450435	0.179389	0.652458	-0.473069	0.00429664	0	0
MZT1	Q08AG7	ONC	1.44435	1.50064	-0.0562962	0.450436	0.799023	1.30848	-0.509459	0.00296763	0	0
RASA1	P20936	NEU	0.412652	0.466285	-0.0536323	0.450932	0.334472	0.383907	-0.0494351	0.619387	0	0
PVR	P15151	NEU	1.76741	1.88298	-0.115566	0.452104	1.19246	1.80943	-0.616972	0.00229749	0	0
FCRL6	Q6DN72	INF	2.1044	2.20185	-0.0974547	0.453198	1.3161	1.86392	-0.547822	0.0476609	0	0
CEP85	Q6P2H3	ONC	1.05271	1.10912	-0.056412	0.456551	0.576441	0.901502	-0.325062	0.0262019	0	0
ADAM15	Q13444	CAR	1.79685	1.89974	-0.102898	0.456651	0.834508	1.07393	-0.239426	0.038165	0	0
WARS	P23381	NEU	-0.621929	-0.464245	-0.157685	0.462251	-1.62037	-0.829195	-0.791173	6.64572e-05	0	0	0.000194
NPTN	Q9Y639	ONC	0.927366	0.985622	-0.0582565	0.462715	0.356662	0.443294	-0.0866329	0.986575	0	0
CD200R1	Q8TD46	INF	1.3801	1.33219	0.0479158	0.462815	0.92286	0.685575	0.237285	0.193789	0	0
CD69	Q07108	CAR	2.60476	2.79481	-0.190053	0.463109	2.10586	3.39745	-1.29158	0.000845823	0	0
TIA1	P31483	CAR	0.87437	0.937798	-0.0634275	0.466184	2.02545	3.6558	-1.63035	7.52375e-05	0	0
CA11	O75493	ONC	0.408183	0.298691	0.109491	0.466847	0.315788	0.228246	0.0875413	0.158577	0	0
IL17F	Q96PD4	INF	0.865083	0.75871	0.106373	0.46878	0.70731	0.631929	0.0753818	0.853133	0	0
EPHA10	Q5JZY3	NEU	-0.161751	-0.142804	-0.0189468	0.470748	-0.307452	0.0281699	-0.335622	0.2958	0	0
LPO	P22079	NEU	1.74919	1.85685	-0.107665	0.471801	1.4025	1.12811	0.274392	0.343055	0	0
CHRDL2	Q6WN34	CAR	1.08356	1.19096	-0.107401	0.47534	1.20542	0.995507	0.209913	0.938426	0	0
KDR	P35968	ONC	0.814406	0.771239	0.0431676	0.47657	0.166149	0.229485	-0.0633363	0.840795	0	0
REG1B	P48304	CAR	1.54646	1.48676	0.0597021	0.479495	1.51723	1.71637	-0.199141	0.466723	0	0
TCL1B	O95988	CAR	0.840912	0.914923	-0.0740102	0.480688	0.906707	0.891981	0.014726	0.470336	0	0
RAB37	Q96AX2	INF	1.0117	0.762939	0.248758	0.481434	0.983045	1.39718	-0.414134	0.370684	0	0
CLMP	Q9H6B4	ONC	0.874671	0.844355	0.0303155	0.48288	0.338087	0.462844	-0.124757	0.51086	0	0
HSD11B1	P28845	INF	1.60186	1.5381	0.0637614	0.487349	0.972448	1.07271	-0.100264	0.757535	0	0
REG1A	P05451	CAR	1.58051	1.55407	0.026434	0.491727	1.41002	1.48879	-0.0787738	0.959739	0	0
AK1	P00568	CAR	1.89933	2.00053	-0.101198	0.491921	2.07931	3.17021	-1.09089	0.000276572	0	0
CD22	P20273	INF	1.30866	1.39079	-0.082129	0.494986	0.888843	0.971914	-0.0830708	0.66537	0	0
GLO1	Q04760	CAR	1.79907	1.86713	-0.0680551	0.495435	-1.75226	-0.425592	-1.32666	4.67087e-06	0	0
DKK4	Q9UBT3	NEU	1.9271	2.06146	-0.134358	0.495567	1.25195	1.25037	0.00157532	0.88545	0	0
VWC2	Q2TAL6	NEU	1.62502	1.70789	-0.0828695	0.495567	1.0521	1.29626	-0.244161	0.266773	0	0
HMOX1	P09601	CAR	1.10966	1.01993	0.0897246	0.496114	0.510897	0.522983	-0.0120863	0.792767	0	0
RAB6B	Q9NRW1	NEU	0.829303	0.678137	0.151166	0.49618	-0.104022	0.183994	-0.288016	0.0614563	0	0
AKT3	Q9Y243	ONC	0.753458	0.698837	0.0546208	0.496354	0.970948	1.39406	-0.423116	0.0106596	0	0
GKN1	Q9NS71	NEU	1.04259	1.10695	-0.0643613	0.501352	0.84626	0.82723	0.0190299	0.936213	0	0
MANSC1	Q9H8J5	ONC	0.723581	0.796712	-0.0731305	0.503017	0.0857152	0.428965	-0.34325	0.0766487	0	0
MPIG6B	O95866	INF	3.96967	4.18583	-0.216155	0.503127	2.48917	3.50062	-1.01146	0.0131579	0	0
PLXNB3	Q9ULL4	CAR	1.41348	1.5019	-0.0884158	0.504558	0.605442	1.06327	-0.45783	0.00406784	0	0
CEACAM3	P40198	ONC	1.0561	1.20046	-0.144366	0.504965	0.425222	0.346557	0.0786643	0.723664	0	0
VAT1	Q99536	ONC	0.775897	0.853717	-0.0778202	0.506074	0.22847	0.411212	-0.182742	0.158411	0	0
IRAK4	Q9NWZ3	INF	3.25209	3.32832	-0.0762299	0.50747	4.68455	5.90261	-1.21805	0.00285623	0	0
CTSO	P43234	INF	1.49944	1.53061	-0.0311674	0.507574	0.686768	1.19704	-0.51027	1.3726e-05	0	0
LAMP3	Q9UQV4	INF	1.07446	0.97465	0.099815	0.507574	-0.051212	0.566022	-0.617234	0.0767911	0	0	0.00099
TGFBR3	Q03167	CAR	0.317651	0.455565	-0.137914	0.508296	-0.0128348	0.301226	-0.314061	0.913876	0	0
NCAN	O14594	NEU	1.37425	1.30136	0.0728916	0.509818	1.07387	0.991009	0.0828568	0.609761	0	0
CD38	P28907	ONC	0.715945	0.81087	-0.0949251	0.510401	-0.38668	0.205915	-0.592596	0.000333467	0	0
CDH1	P12830	CAR	1.2656	1.32912	-0.063512	0.512483	0.14288	0.311452	-0.168571	0.335381	0	0
TBC1D5	Q92609	INF	2.02684	2.20083	-0.173996	0.512568	0.621591	1.23213	-0.610541	0.00327337	0	0
CEACAM1	P13688	ONC	0.859688	0.946771	-0.0870839	0.516525	0.477092	0.528169	-0.051077	0.466723	0	0
RETN	Q9HD89	CAR	1.35992	1.48024	-0.120321	0.516687	0.273698	0.768467	-0.494769	0.0574412	0	0
LILRB5	O75023	CAR	0.625363	0.467941	0.157423	0.516688	0.154723	0.187644	-0.0329208	0.567015	0	0
CCL17	Q92583	INF	4.62678	4.78113	-0.154352	0.517545	1.75175	2.60533	-0.853579	0.0447202	0	0
VNN2	O95498	ONC	1.87839	1.91701	-0.0386228	0.519114	0.460985	0.735443	-0.274459	0.274431	0	0
FOLR3	P41439	ONC	-1.63331	-1.91983	0.286517	0.521069	-2.75054	-1.45766	-1.29288	0.0237567	0	0
CD209	Q9NNX6	CAR	0.687038	0.672386	0.0146517	0.523027	0.47958	0.279637	0.199943	0.256687	0	0
OPTC	Q9UBM4	ONC	0.961702	1.10435	-0.142651	0.523499	0.159871	0.645289	-0.485418	0.00432477	0	0
LY96	Q9Y6Y9	NEU	1.47084	1.51749	-0.0466559	0.52491	0.939978	1.27546	-0.335479	0.035106	0	0
FES	P07332	ONC	1.03881	1.07624	-0.0374345	0.526828	0.786016	1.00993	-0.223912	0.180017	0	0
CD99	P14209	NEU	0.931215	0.935647	-0.00443219	0.528921	0.498035	0.573222	-0.075187	0.963032	0	0
SKAP1	Q86WV1	NEU	0.315957	0.191582	0.124375	0.529886	0.182383	0.468584	-0.286201	0.0248256	0	0
SSC4D	Q8WTU2	CAR	-0.221491	-0.0935978	-0.127893	0.530335	-0.412051	-0.500423	0.088372	0.769026	0	0
FEN1	P39748	ONC	2.39875	2.59161	-0.192851	0.531258	-0.0959762	0.170729	-0.266705	0.00767905	0	0	0.000785
TLR3	O15455	INF	1.04199	1.15797	-0.115979	0.533245	0.543427	0.276518	0.266909	0.322278	0	0
TFF3	Q07654	CAR	1.18582	1.16984	0.0159752	0.533685	0.766392	1.15922	-0.392828	0.0785768	0	0
SUSD1	Q6UWL2	CAR	1.55065	1.51278	0.0378716	0.535913	1.05819	1.68163	-0.623438	0.0035578	0	0
DNPH1	O43598	INF	2.43124	2.50611	-0.0748721	0.537097	2.79655	3.79042	-0.993871	0.000653433	0	0
CTSC	P53634	INF	3.16604	3.27594	-0.109894	0.537097	3.00282	3.244	-0.241186	0.335381	0	0
MAP2K6	P52564	INF	3.58672	3.7963	-0.209584	0.538451	3.07153	4.08496	-1.01343	0.00901242	0	0
AOC1	P19801	INF	-0.376872	-0.348099	-0.0287729	0.539247	-0.728109	-0.813144	0.0850357	0.959739	0	0
PSRC1	Q6PGN9	ONC	0.791215	0.624859	0.166356	0.540174	0.504304	0.866961	-0.362658	0.0847406	0	0
ADCYAP1R1	P41586	ONC	0.0111371	-0.0546972	0.0658343	0.540174	-0.177983	-0.138835	-0.0391479	0.42766	0	0
EIF5A	P63241	INF	0.379701	0.439063	-0.0593612	0.54467	0.234701	0.233276	0.00142448	0.959739	0	0
CLEC6A	Q6EIG7	ONC	1.837	2.00273	-0.165731	0.549164	-0.262709	0.508481	-0.77119	0.000758161	0	0
ACOX1	Q15067	CAR	0.328304	0.29586	0.032444	0.550095	0.444561	0.682023	-0.237461	0.0618335	0	0
L1CAM	P32004	ONC	0.996746	0.97078	0.0259658	0.553444	0.220592	0.353537	-0.132945	0.676347	0	0
GGA1	Q9UJY5	NEU	1.25167	1.06065	0.191021	0.554611	1.20668	1.30555	-0.0988701	0.936213	0	0
FUT8	Q9BYC5	NEU	3.37668	3.42692	-0.0502477	0.555117	1.17379	1.84261	-0.668821	0.0142048	0	0
CA2	P00918	NEU	3.24266	3.32443	-0.0817625	0.555127	3.71038	4.95652	-1.24614	0.00109725	0	0
PNPT1	Q8TCS8	INF	1.16278	0.878983	0.283802	0.555596	1.67762	1.77752	-0.0998948	0.601464	0	0
RABEPK	Q7Z6M1	ONC	0.787973	0.827658	-0.0396848	0.558227	0.880822	1.13075	-0.249931	0.271327	0	0
NFKBIE	O00221	ONC	1.3689	1.43587	-0.0669723	0.558228	0.500647	1.08658	-0.585938	0.00336354	0	0
HGS	O14964	ONC	1.22399	1.21014	0.0138501	0.558228	2.11111	3.04491	-0.933807	0.00429664	0	0
APEX1	P27695	ONC	3.53028	3.8092	-0.278929	0.558728	0.399502	1.63677	-1.23727	4.67087e-06	0	0
THBS4	P35443	CAR	1.06399	0.999713	0.0642805	0.5597	0.725105	0.895668	-0.170563	0.42766	0	0
VPS37A	Q8NEZ2	ONC	1.54929	1.63738	-0.0880907	0.563803	1.65536	2.50645	-0.851091	0.00697466	0	0
PKLR	P30613	INF	2.98133	2.75126	0.23007	0.567105	2.75549	3.71188	-0.956394	0.0118525	0	0
PSMG3	Q9BT73	INF	1.73723	1.77747	-0.0402398	0.570353	2.15469	3.21558	-1.06089	1.90939e-05	0	0
MAP4K5	Q9Y4K4	NEU	1.07414	1.13506	-0.060917	0.570533	2.52235	3.89709	-1.37473	0.000437826	0	0
STXBP3	O00186	ONC	0.702483	0.608477	0.094006	0.571957	0.862709	1.21972	-0.35701	0.0573765	0	0
MFAP3	P55082	CAR	0.359327	0.403819	-0.0444926	0.572648	0.210658	0.249366	-0.0387078	0.470336	0	0
CPVL	Q9H3G5	ONC	1.37786	1.34739	0.0304687	0.572689	0.727514	0.741091	-0.0135766	0.637959	0	0
REG4	Q9BYZ8	INF	1.71365	1.77948	-0.0658377	0.577283	0.928698	0.984378	-0.0556797	0.932948	0	0
FRZB	Q92765	NEU	0.648769	0.676472	-0.0277022	0.580923	0.598224	0.640617	-0.0423929	0.712612	0	0
LILRA2	Q8N149	NEU	0.927516	0.994068	-0.066552	0.581953	0.400824	0.56748	-0.166656	0.411498	0	0
FGF5	P12034	INF	1.4757	1.53827	-0.0625691	0.583372	0.939566	1.24388	-0.304316	0.158577	0	0
ARNT	P27540	INF	-0.988763	-0.963754	-0.0250093	0.583373	-1.41447	-1.37722	-0.037249	0.959739	0	0
STX16	O14662	ONC	0.80162	0.738534	0.0630855	0.585846	0.672233	0.61107	0.0611622	1	0	0
SPINK4	O60575	INF	1.82966	2.0177	-0.188043	0.586635	1.31533	1.35002	-0.0346935	0.730036	0	0
CARHSP1	Q9Y2V2	NEU	2.51628	2.57805	-0.0617742	0.587842	2.56116	3.44836	-0.887203	0.00399419	0	0
SLITRK6	Q9H5Y7	CAR	1.51948	1.63582	-0.11634	0.588749	0.660747	0.956478	-0.295731	0.0449436	0	0
IL20	Q9NYY1	INF	-0.248863	-0.352294	0.103431	0.589006	-0.78936	-0.659656	-0.129704	0.601464	0	0
CSF3	P09919	INF	1.79657	1.6899	0.106666	0.589006	1.5581	1.61258	-0.0544867	0.853133	0	0
ITGB6	P18564	INF	0.839512	1.03793	-0.198414	0.589006	0.167116	0.328713	-0.161598	0.51081	0	0
IFNG	P01579	INF	2.10422	2.15135	-0.0471302	0.589006	1.1457	1.65079	-0.505087	0.271327	0	0
IL13	P35225	INF	0.187091	0.248112	-0.0610218	0.589006	-0.054929	0.159543	-0.214472	0.203473	0	0
MIA	Q16674	ONC	1.17289	1.1746	-0.00171463	0.58919	0.515068	0.643701	-0.128633	0.72219	0	0
TCN2	P20062	CAR	1.26048	1.1967	0.0637806	0.590806	0.653279	1.06047	-0.407187	0.0332712	0	0
PLA2G1B	P04054	CAR	1.64632	1.67967	-0.0333495	0.590807	1.18234	1.34125	-0.158912	1	0	0
TSHB	P01222	CAR	0.86408	1.12375	-0.259675	0.592973	1.0374	1.47014	-0.432737	0.313098	0	0
KEL	P23276	NEU	0.601724	0.516829	0.0848952	0.593469	-0.0396675	0.240441	-0.280108	0.0825275	0	0
TPPP3	Q9BW30	NEU	0.347641	0.299651	0.0479903	0.593469	-0.602539	-0.431461	-0.171077	0.178057	0	0
FABP6	P51161	CAR	0.690938	0.788159	-0.0972213	0.594162	0.254595	0.371133	-0.116538	0.88545	0	0
ADAM23	O75077	INF	0.687965	0.675944	0.012021	0.595588	0.513286	0.638531	-0.125244	0.810218	0	0
CBLIF	P27352	CAR	0.630617	0.561873	0.0687439	0.597574	-0.158205	-0.239435	0.0812301	0.913876	0	0
FCGR2B	P31994	ONC	0.445166	0.459152	-0.0139859	0.599889	0.142311	0.302331	-0.16002	0.191489	0	0
ANKRD54	Q6NXT1	ONC	1.61049	1.47111	0.139381	0.604604	1.31912	1.89954	-0.580423	0.0106596	0	0
SPARC	P09486	ONC	4.31081	4.39793	-0.0871165	0.60623	1.23233	2.13608	-0.903752	0.00180797	0	0
NTF3	P20783	INF	0.341031	0.328982	0.0120494	0.608673	0.247063	-0.241869	0.488932	0.024274	0	0
GPA33	Q99795	ONC	2.19264	1.98709	0.20555	0.610266	1.81557	1.42407	0.391506	0.592293	0	0
TP53INP1	Q96A56	CAR	0.259846	0.320465	-0.0606194	0.610536	0.10498	0.110929	-0.00594935	0.770234	0	0
TANK	Q92844	INF	1.76726	1.87222	-0.10496	0.61178	0.556229	1.44302	-0.886792	0.000351772	0	0
ATG4A	Q8WYN0	ONC	1.2934	1.14828	0.145114	0.614083	1.53451	2.56639	-1.03188	0.000529452	0	0
WIF1	Q9Y5W5	ONC	1.61986	1.6077	0.0121569	0.61554	0.32301	0.652731	-0.329721	0.101776	0	0
CRHR1	P34998	CAR	0.298468	0.258602	0.0398662	0.616039	0.247351	0.388183	-0.140832	0.51086	0	0
DUOX2	Q9NRD8	CAR	0.18467	0.127674	0.0569955	0.616039	0.151587	-0.0539807	0.205568	0.574809	0	0
GUCA2A	Q02747	NEU	0.663863	0.660275	0.0035874	0.618633	0.58283	0.497094	0.085736	0.344071	0	0
MEPE	Q9NQ76	INF	-0.187947	-0.108165	-0.0797827	0.62147	-0.307871	-0.191461	-0.11641	0.82681	0	0
IL11	P20809	INF	1.00644	0.876023	0.13042	0.623311	0.954304	0.608505	0.345799	0.215978	0	0
RGMB	Q6NW40	NEU	0.787492	0.869435	-0.0819428	0.624458	0.345886	0.6558	-0.309914	0.0766487	0	0
NDRG1	Q92597	NEU	0.554713	0.454015	0.100698	0.627736	0.40194	0.552865	-0.150925	0.266773	0	0
FGFBP1	Q14512	ONC	1.03281	1.03401	-0.00120129	0.630945	0.288747	0.183988	0.104759	0.466723	0	0
SIGLEC15	Q6ZMC9	NEU	0.846593	0.687143	0.15945	0.633527	0.294541	0.313772	-0.0192305	0.936213	0	0
IL4R	P24394	INF	1.48799	1.64188	-0.153894	0.636726	0.152613	0.837271	-0.684658	5.78157e-05	0	0
AHSP	Q9NZD4	NEU	3.00378	2.77961	0.224178	0.637344	3.2094	3.86379	-0.654397	0.270099	0	0
HBQ1	P09105	ONC	1.27811	1.12177	0.156337	0.639938	1.77721	1.99244	-0.215232	0.343055	0	0
PLXNB2	O15031	CAR	1.45694	1.48737	-0.0304311	0.641231	0.866876	1.16526	-0.298384	0.0624015	0	0		0.000737
ENTPD6	O75354	CAR	1.43349	1.39785	0.0356409	0.64387	0.694058	0.882638	-0.188581	0.101776	0	0
PI3	P19957	CAR	0.974939	0.914208	0.0607311	0.655289	0.276138	0.662516	-0.386378	0.0618335	0	0		3.84e-06
AFP	P02771	NEU	1.66188	1.73861	-0.0767306	0.656004	0.837343	1.31011	-0.472762	0.170038	0	0
GLT8D2	Q9H1C3	NEU	0.412248	0.371817	0.0404306	0.662824	0.136578	0.271789	-0.13521	0.359795	0	0
NUDT2	P50583	ONC	0.916019	0.965547	-0.0495284	0.663248	1.69869	2.08576	-0.387068	0.0329269	0	0
FCRL1	Q96LA6	CAR	0.81789	0.736417	0.0814735	0.663613	0.367001	0.162756	0.204245	0.411498	0	0
KAZALD1	Q96I82	ONC	0.734816	0.666634	0.0681819	0.668154	-0.186276	0.120843	-0.307119	0.358657	0	0
NPTXR	O95502	CAR	1.36456	1.40004	-0.0354816	0.66844	0.767172	0.981082	-0.21391	0.328354	0	0
CEP164	Q9UPV0	INF	0.455688	0.499116	-0.0434278	0.670346	0.1649	-0.0414634	0.206363	0.286519	0	0
SCGB3A2	Q96PL1	INF	1.48008	1.27986	0.200229	0.672518	0.904895	0.925165	-0.0202699	0.370684	0	0
LRP1	Q07954	ONC	1.0978	1.13479	-0.0369956	0.673075	-0.0583054	0.0974354	-0.155741	0.217356	0	0
CCL27	Q9Y4X3	CAR	2.49652	2.59438	-0.0978619	0.67328	0.623779	1.71135	-1.08757	0.000964236	0	0
WASF3	Q9UPY6	NEU	0.996798	0.96689	0.0299081	0.674692	1.74921	2.61358	-0.864372	0.00695584	0	0
LGALS7B/NA	P47929/LGALS7	ONC	0.597497	0.584658	0.0128384	0.674755	0.00089375	0.502839	-0.501945	0.0526769	0	0
FMNL1	O95466	NEU	2.6285	2.76162	-0.133116	0.680656	-0.368273	0.297855	-0.666127	8.94693e-05	0	0
PLIN1	O60240	NEU	1.11773	1.24972	-0.131994	0.680656	0.15657	0.419278	-0.262708	0.032253	0	0
ENPP2	Q13822	CAR	1.3622	1.43761	-0.0754024	0.68377	0.961652	1.05746	-0.0958118	0.699135	0	0
CHIT1	Q13231	CAR	0.95981	1.39475	-0.434944	0.68377	-1.07071	0.93661	-2.00732	0.00109725	0	0
LPL	P06858	CAR	1.59402	1.54086	0.0531587	0.692777	1.31998	1.28107	0.0389078	0.745494	0	0
GP1BA	P07359	CAR	1.45545	1.53123	-0.0757777	0.693367	0.660475	0.850298	-0.189823	0.180017	0	0
ICAM4	Q14773	INF	1.35895	1.26088	0.0980656	0.694388	0.360965	0.351765	0.00919962	0.813406	0	0
SIGLEC6	O43699	ONC	1.05085	1.03119	0.0196592	0.694974	0.458474	0.538549	-0.0800753	0.66537	0	0
CRISP2	P16562	ONC	0.391834	0.331609	0.0602253	0.694974	-0.235104	-0.409401	0.174296	0.2958	0	0
NRCAM	Q92823	CAR	1.10914	1.13775	-0.0286071	0.697684	0.453671	0.80803	-0.354359	0.185682	0	0
CD177	Q8N6Q3	NEU	0.944883	0.755094	0.18979	0.699716	0.0401863	-0.0394208	0.0796071	1	0	0
BLVRB	P30043	NEU	2.3662	2.38749	-0.0212935	0.699716	2.23655	3.18841	-0.951865	0.00290082	0	0
CCL13	Q99616	INF	2.87839	2.80903	0.0693567	0.699716	0.941041	1.26358	-0.322535	0.253	0	0
VASH1	Q7L8A9	INF	0.343727	0.34672	-0.0029929	0.70026	0.81192	1.51799	-0.70607	0.00486162	0	0
AKR1B1	P15121	ONC	1.83194	1.85809	-0.0261474	0.702149	2.44548	3.50027	-1.05479	0.000561839	0	0
IL5	P05113	INF	-5.55384	-5.62581	0.071965	0.706503	-5.42079	-5.50112	0.0803248	0.335381	0	0
PSMA1	P25786	ONC	0.38032	0.338937	0.0413826	0.707175	0.462357	0.203489	0.258869	0.215978	0	0
ADGRE5	P48960	CAR	1.25758	1.23879	0.0187906	0.707855	0.504709	0.691157	-0.186448	0.447884	0	0
OXT	P01178	NEU	-0.411335	-0.635224	0.22389	0.708141	-0.213772	-0.60737	0.393598	0.344071	0	0
GBP4	Q96PP9	NEU	1.4404	1.41206	0.0283435	0.710773	0.718104	1.29168	-0.573576	0.00132582	0	0	9.29e-05
CCL28	Q9NRJ3	INF	2.40593	2.4915	-0.0855725	0.712058	2.53759	3.3557	-0.818108	0.109781	0	0
TCL1A	P56279	NEU	1.10021	1.21727	-0.117057	0.714747	2.07125	2.26344	-0.192187	0.470336	0	0
CD48	P09326	INF	0.893317	0.922811	-0.0294937	0.716721	0.277836	0.545037	-0.267201	0.0982003	0	0
SELE	P16581	CAR	1.72214	1.76103	-0.0388837	0.717574	1.02694	1.16782	-0.140882	0.72219	0	0
MAPT	P10636	NEU	0.110246	0.164354	-0.0541081	0.72295	-0.124277	-0.0641102	-0.0601669	0.736655	0	0
ADGRB3	O60242	NEU	1.34008	1.32289	0.0171913	0.72329	0.899522	0.860084	0.0394383	0.88545	0	0
RAB6A	P20340	INF	2.84303	2.75724	0.0857947	0.723924	1.25755	0.760814	0.496739	0.315744	0	0
SIT1	Q9Y3P8	INF	-0.562606	-0.607082	0.0444762	0.724839	-0.399059	-0.0260843	-0.372975	0.00611947	0	0
NCS1	P62166	ONC	1.08906	1.17006	-0.0810068	0.725709	-0.27112	0.132587	-0.403707	0.088596	0	0
FUCA1	P04066	CAR	1.27859	1.2705	0.00808941	0.727338	0.383374	0.818414	-0.43504	0.207576	0	0
IL1A	P01583	INF	-0.0131762	-0.00966439	-0.00351183	0.730987	0.314951	0.25369	0.0612608	0.800674	0	0
ART3	Q13508	CAR	0.482875	0.512282	-0.0294066	0.732235	0.0903519	0.210291	-0.11994	0.723664	0	0
PLA2G10	O15496	NEU	1.52523	1.63544	-0.110206	0.740476	1.19316	0.992108	0.201054	0.394739	0	0
PRELP	P51888	INF	0.777919	0.778969	-0.00104974	0.74202	0.353605	0.307158	0.0464472	0.673743	0	0
ADA2	Q9NZK5	CAR	1.1451	1.11801	0.0270883	0.746998	0.254962	0.724119	-0.469157	0.0344428	0	0	0.000926
PHOSPHO1	Q8TCT1	NEU	0.420252	0.548991	-0.128739	0.752007	-0.0512757	0.282055	-0.333331	0.0116662	0	0
ALDH3A1	P30838	INF	1.11812	0.958675	0.159441	0.753877	0.787766	0.714271	0.0734946	0.543205	0	0
SLAMF1	Q13291	INF	1.35544	1.39944	-0.0439926	0.755748	0.734354	0.953909	-0.219556	0.352761	0	0
CA1	P00915	CAR	2.53234	2.55796	-0.0256224	0.756891	2.86292	3.63643	-0.773506	0.0196789	0	0
PNLIPRP2	P54317	INF	-0.231822	-0.323177	0.0913552	0.761895	-1.17766	0.0589429	-1.2366	0.370684	0	0
PRKCQ	Q04759	INF	0.692284	0.701108	-0.00882398	0.761979	0.775073	0.672273	0.1028	0.468242	0	0
PAPPA	Q13219	INF	0.283136	0.263425	0.0197111	0.761979	0.59957	0.398349	0.20122	0.51081	0	0
ANXA10	Q9UJ72	NEU	0.754735	0.892474	-0.137739	0.766108	0.224332	0.445109	-0.220777	0.490379	0	0
LTA4H	P09960	ONC	4.29969	4.34587	-0.0461792	0.767379	4.6382	5.00109	-0.362888	0.0188907	0	0
RGS8	P57771	INF	0.678388	0.609339	0.0690485	0.768225	0.436697	0.550299	-0.113602	0.986575	0	0
ADA	P00813	INF	1.18485	1.14801	0.0368436	0.769217	0.660882	1.07357	-0.412692	0.0105504	0	0
CCN5	O76076	NEU	1.67949	1.60298	0.0765114	0.774261	0.693578	0.895491	-0.201913	0.466723	0	0
CD5	P06127	ONC	1.23759	1.20037	0.0372225	0.775271	0.540501	0.867948	-0.327447	0.0526769	0	0
IGFBP7	Q16270	CAR	1.09816	1.2024	-0.104239	0.776796	0.5189	0.67278	-0.15388	0.447884	0	0
LEPR	P48357	CAR	1.17341	1.16217	0.0112475	0.777785	0.692742	0.679328	0.013414	0.588213	0	0
CTF1	Q16619	CAR	0.648955	0.719982	-0.0710267	0.777883	0.499767	1.14135	-0.641584	0.00447691	0	0
KLK12	Q9UKR0	ONC	0.487716	0.394846	0.0928699	0.778792	0.229661	0.0645759	0.165085	0.749075	0	0
LGALS4	P56470	INF	0.699731	0.77582	-0.0760893	0.779056	0.458616	0.507641	-0.0490252	0.879616	0	0
DSG3	P32926	ONC	0.947712	1.02029	-0.0725739	0.780546	-0.0898018	0.117472	-0.207273	0.51086	0	0
CRTAC1	Q9NQ79	CAR	0.712284	0.709268	0.00301632	0.781795	-0.776409	-1.0019	0.225487	0.567015	0	0
ITGB2	P05107	CAR	1.51616	1.48071	0.0354559	0.781795	1.79171	1.66076	0.130945	0.360247	0	0
GH1	P01241	CAR	5.20965	5.19799	0.0116585	0.782881	4.71942	5.60108	-0.881657	0.156032	0	0
BAG6	P46379	CAR	1.24271	1.21554	0.027168	0.789926	0.607254	0.997872	-0.390619	0.00559768	0	0
PTPRM	P28827	INF	1.40795	1.39001	0.0179389	0.790311	0.64802	0.736035	-0.088015	0.730036	0	0
COPE	O14579	NEU	0.556459	0.653888	-0.097429	0.791109	0.0905398	0.345153	-0.254614	0.0178362	0	0
TGM2	P21980	CAR	1.20826	1.15482	0.0534349	0.793101	2.36664	2.99076	-0.624116	0.0821686	0	0
MMP3	P08254	NEU	0.261932	0.294917	-0.0329848	0.79453	-1.44885	-1.22238	-0.226478	0.792767	0	0
IL17A	Q16552	INF	0.198302	0.152782	0.0455203	0.799676	-0.0562349	0.202432	-0.258667	0.286519	0	0
CDNF	Q49AH0	ONC	0.84061	0.857324	-0.0167149	0.800145	0.32725	0.633301	-0.306051	0.180391	0	0
JAM2	P57087	NEU	1.0608	1.09837	-0.0375777	0.800446	0.585968	0.770173	-0.184205	0.588213	0	0
SMPD1	P17405	NEU	1.70467	1.70287	0.00179123	0.800447	1.03598	1.48813	-0.45215	0.0138279	0	0
PROC	P04070	CAR	1.38058	1.38742	-0.00684073	0.801882	0.730436	0.904076	-0.17364	0.180017	0	0
APOM	O95445	CAR	1.15434	1.14373	0.0106117	0.806925	0.804158	0.694633	0.109525	0.468242	0	0
EPHX2	P34913	CAR	1.02775	1.09197	-0.0642225	0.808082	1.14171	1.51564	-0.373925	0.0248256	0	0
HDGF	P51858	ONC	4.5482	4.61638	-0.0681779	0.809732	3.66724	4.7279	-1.06066	0.015642	0	0	0.000984
NELL1	Q92832	ONC	0.495128	0.535228	-0.0401004	0.811535	-0.153161	0.133423	-0.286584	0.165499	0	0
IGFBP6	P24592	CAR	0.876508	0.859375	0.0171323	0.811976	0.432288	0.456494	-0.0242056	0.698545	0	0
UMOD	P07911	CAR	0.661644	0.619254	0.0423903	0.811976	0.193557	0.163661	0.0298963	0.987674	0	0
TIE1	P35590	CAR	1.02116	1.052	-0.0308358	0.811976	0.517009	0.657366	-0.140357	0.298303	0	0
FCRL3	Q96P31	INF	0.366075	0.337122	0.028953	0.812351	-0.0340439	0.0977201	-0.131764	0.673743	0	0
CRIM1	Q9NZV1	INF	1.08781	1.14037	-0.0525619	0.813695	0.187496	0.590032	-0.402536	0.00201446	0	0
NELL2	Q99435	INF	0.888026	0.884088	0.00393792	0.813695	0.3736	0.453943	-0.080343	0.555259	0	0
PSPN	O60542	INF	-1.22325	-1.24002	0.0167687	0.821031	-0.447032	-1.30084	0.853812	0.024274	0	0
PRKAR1A	P10644	CAR	1.55931	1.48831	0.0709986	0.821383	2.27182	3.26491	-0.99309	0.00141333	0	0
CD55	P08174	CAR	1.11229	1.12341	-0.0111251	0.822102	0.527805	0.781445	-0.25364	0.105523	0	0
LAIR2	Q6ISS4	NEU	0.717924	0.656697	0.0612274	0.822273	0.510974	0.187078	0.323896	0.66537	0	0
ITGAM	P11215	NEU	0.721186	0.684639	0.036547	0.825191	0.614589	0.474133	0.140457	0.328354	0	0
CD160	O95971	INF	1.22895	1.23237	-0.00341755	0.825191	0.602148	0.845969	-0.243821	0.377025	0	0
IDS	P22304	INF	0.445721	0.466439	-0.020718	0.825191	0.403985	0.389933	0.0140519	0.98723	0	0
CCL24	O00175	INF	0.649067	0.731268	-0.0822009	0.825327	-1.09205	-0.164185	-0.927862	0.0161404	0	0
KIR3DL1	P43629	ONC	0.358245	0.425507	-0.0672621	0.825889	-0.17713	0.338215	-0.515345	0.242576	0	0
ITGA6	P23229	INF	0.514992	0.534433	-0.0194409	0.82721	0.835263	0.800946	0.0343177	0.500892	0	0
IL15	P40933	INF	1.49441	1.54902	-0.0546123	0.82721	0.890905	0.884239	0.00666615	0.841711	0	0
MUC13	Q9H3R2	NEU	1.41305	1.49664	-0.0835903	0.82901	0.715273	0.871415	-0.156142	0.712612	0	0
ICAM5	Q9UMF0	CAR	1.55238	1.61919	-0.0668081	0.82914	0.718804	1.00986	-0.291056	0.219181	0	0
BTC	P35070	ONC	1.45542	1.38645	0.068971	0.831165	1.06623	1.51964	-0.453414	0.271327	0	0
CPB1	P15086	CAR	1.53148	1.57174	-0.0402618	0.832256	1.16013	1.53008	-0.369957	0.298303	0	0
HNRNPK	P61978	CAR	0.464729	0.476134	-0.0114048	0.832451	0.375734	0.791823	-0.416089	0.000437826	0	0
LYPD3	O95274	ONC	0.818161	0.873907	-0.0557463	0.836099	0.186627	0.0520471	0.13458	0.865038	0	0
GFRA2	O00451	ONC	0.647895	0.643468	0.00442632	0.836867	0.140675	0.146471	-0.00579643	0.616452	0	0
EREG	O14944	NEU	4.65973	4.69903	-0.0392963	0.840089	0.336929	0.805686	-0.468758	0.00624465	0	0
RSPO1	Q2MKA7	NEU	2.26176	2.32691	-0.0651519	0.840089	1.33928	1.87565	-0.536369	0.14134	0	0
IL34	Q6ZMJ4	NEU	0.735259	0.794804	-0.0595452	0.841738	0.343319	0.514265	-0.170947	0.2958	0	0
CTRC	Q99895	INF	1.71625	1.67542	0.0408314	0.842845	1.11672	1.36932	-0.252597	0.879616	0	0
SLC39A5	Q6ZMH5	INF	1.12256	1.15947	-0.0369123	0.845809	0.133014	0.686042	-0.553028	0.0197222	0	0
IL3RA	P26951	INF	0.749241	0.754856	-0.00561501	0.853867	0.342316	0.410549	-0.0682325	0.352761	0	0
PPIB	P23284	CAR	3.9061	3.99472	-0.0886231	0.857763	3.17555	4.5233	-1.34775	0.00325185	0	0
CSF2RA	P15509	NEU	0.998155	1.0253	-0.0271408	0.857988	0.0741329	0.336384	-0.262251	0.108911	0	0
RET	P07949	ONC	0.430619	0.445272	-0.014653	0.858017	-1.58879	-1.51424	-0.0745529	0.716972	0	0
RTN4R	Q9BZR6	ONC	1.00491	1.0418	-0.036887	0.858048	0.357156	0.578765	-0.221609	0.170038	0	0
SCARB1	Q8WTV0	NEU	-0.24983	-0.180398	-0.0694323	0.860905	-0.514962	-0.394854	-0.120108	0.088596	0	0
SESTD1	Q86VW0	NEU	0.694301	0.648168	0.0461339	0.860905	0.815262	1.19621	-0.380947	0.150473	0	0
RABGAP1L	Q5R372	INF	1.66541	1.54042	0.124992	0.863511	1.82591	2.82206	-0.99615	0.000152691	0	0
CCL26	Q9Y258	INF	3.78777	3.82385	-0.036076	0.864494	2.47057	3.07675	-0.60618	0.169437	0	0
TAFA5	Q7Z5A7	ONC	1.51407	1.5232	-0.00913331	0.868631	0.950289	1.19499	-0.244705	0.457039	0	0
MTPN	P58546	CAR	0.467855	0.458339	0.00951639	0.869302	0.312976	0.467987	-0.155012	0.116424	0	0
GZMH	P20718	CAR	0.429899	0.355119	0.07478	0.869302	-0.72043	0.0849333	-0.805364	0.00116241	0	0
PLTP	P55058	CAR	1.60444	1.6176	-0.0131635	0.87314	1.06379	1.12459	-0.0608	0.938426	0	0
SEMA7A	O75326	CAR	1.30381	1.31631	-0.0124932	0.87314	0.445078	0.684224	-0.239146	0.0533044	0	0
ARHGAP1	Q07960	ONC	0.915464	0.823333	0.0921316	0.873622	1.47638	1.68856	-0.212182	0.0912771	0	0
CCN1	O00622	ONC	1.45148	1.49001	-0.0385381	0.873948	-1.76229	-0.400311	-1.36198	0.0033674	0	0
SCGN	O76038	INF	1.29223	1.23288	0.0593476	0.8764	0.957985	0.805504	0.152481	0.286519	0	0
NFATC3	Q12968	INF	-0.0669357	-0.119277	0.0523414	0.8764	-0.660232	-0.431708	-0.228524	0.749075	0	0
BST1	Q10588	NEU	0.733055	0.689328	0.0437276	0.87794	0.591257	0.441276	0.149981	0.219181	0	0
SCG3	Q8WXD2	INF	1.31572	1.34761	-0.0318866	0.878109	0.580771	0.910305	-0.329535	0.313846	0	0
DLK1	P80370	CAR	0.64873	0.713285	-0.0645552	0.883419	-0.0032625	0.41217	-0.415433	0.393965	0	0
GFOD2	Q3B7J2	ONC	-1.60247	-1.41521	-0.18726	0.884298	-2.01985	-1.78219	-0.237659	0.352761	0	0
HAGH	Q16775	ONC	1.71204	1.46713	0.244904	0.885135	6.53791	7.33132	-0.79341	0.0486852	0	0
FLT1	P17948	ONC	1.32337	1.30577	0.0175957	0.889929	0.429944	0.585297	-0.155353	0.244761	0	0
MRPL46	Q9H2W6	NEU	0.485213	0.460755	0.0244581	0.893028	0.316069	0.636756	-0.320686	0.032253	0	0
CA3	P07451	CAR	0.685019	0.655838	0.0291814	0.893717	0.719054	1.52457	-0.805512	0.0423227	0	0
PLXNA4	Q9HCM2	INF	2.87823	2.87892	-0.000686602	0.8958	1.45412	2.48469	-1.03057	0.00248659	0	0
CD244	Q9BZW8	INF	1.3606	1.40973	-0.0491339	0.897699	0.834937	0.958739	-0.123803	0.490379	0	0
AMIGO2	Q86SJ2	ONC	1.45317	1.48765	-0.0344798	0.900609	0.411595	0.56291	-0.151316	0.306396	0	0
ADGRE2	Q9UHX3	INF	1.15698	1.17397	-0.0169861	0.901757	0.416183	0.587588	-0.171405	0.489284	0	0
LTO1	Q8WV07	INF	0.635053	0.648678	-0.0136251	0.902273	0.14775	0.396872	-0.249122	0.105523	0	0
MYO9B	Q13459	INF	0.888603	0.889375	-0.000772255	0.902273	0.106278	0.301058	-0.194779	0.22901	0	0		0.000261
CD33	P20138	ONC	0.8472	0.766276	0.0809244	0.902322	0.384784	0.675476	-0.290692	0.196412	0	0
FLT3LG	P49771	INF	1.33553	1.32683	0.00870293	0.902919	0.675419	0.996754	-0.321335	0.071375	0	0
CRH	P06850	ONC	0.595252	0.603261	-0.00800881	0.905712	-1.03558	-0.865643	-0.169937	0.625181	0	0
CLC	Q05315	CAR	1.00406	1.00927	-0.00520043	0.907492	-0.523054	-0.296444	-0.22661	0.411498	0	0
SCARA5	Q6ZMJ2	NEU	1.40173	1.41002	-0.00828983	0.910834	0.718619	1.12367	-0.40505	0.0332712	0	0
ARHGAP25	P42331	ONC	2.97625	3.0314	-0.0551557	0.911077	1.39085	1.97779	-0.586933	0.0118525	0	0
ATP5PO	P48047	NEU	0.560724	0.454558	0.106166	0.912391	0.369793	0.474487	-0.104694	0.2958	0	0
AGER	Q15109	INF	0.836038	0.860329	-0.0242907	0.913616	0.194282	0.44879	-0.254508	0.16905	0	0
PPM1A	P35813	ONC	0.447512	0.409327	0.0381849	0.916446	0.327899	0.563396	-0.235498	0.00611947	0	0
SKAP2	O75563	INF	4.33286	4.42705	-0.0941932	0.919552	1.88094	3.01685	-1.13591	0.0106596	0	0
TIMP4	Q99727	NEU	1.4906	1.47666	0.0139467	0.923837	1.05602	1.19761	-0.141593	0.485983	0	0
ANG	P03950	CAR	1.18604	1.19184	-0.00579715	0.924713	0.526529	0.911698	-0.385169	0.0178355	0	0
MEP1B	Q16820	CAR	0.330026	0.225301	0.104724	0.928572	1.01654	0.611078	0.405457	0.485983	0	0
PECAM1	P16284	NEU	1.26974	1.27191	-0.002175	0.929075	0.682487	1.12271	-0.440227	0.000276572	0	0
SLITRK2	Q9H156	ONC	1.34034	1.36899	-0.0286553	0.934209	0.325618	0.590107	-0.264489	0.180488	0	0
CXCL12	P48061	INF	1.74445	1.77632	-0.0318767	0.934758	1.23445	1.66496	-0.430507	0.0196789	0	0
MFAP5	Q13361	CAR	1.68904	1.70914	-0.0200957	0.935072	0.844651	0.90997	-0.0653189	0.676347	0	0
CPA1	P15085	CAR	1.64782	1.667	-0.0191781	0.935072	1.07493	1.5266	-0.45167	0.114606	0	0
AGR3	Q8TD06	ONC	-0.0392798	-0.0742982	0.0350184	0.937957	-0.325847	-0.417783	0.0919364	0.51081	0	0
CD84	Q9UIB8	INF	1.52496	1.57126	-0.0462997	0.939891	0.320987	0.595713	-0.274726	0.101643	0	0
IL6R	P08887	CAR	0.879299	0.906652	-0.0273523	0.940256	0.393934	0.458628	-0.0646948	0.800674	0	0
DCN	P07585	CAR	0.714363	0.683059	0.0313045	0.94378	0.0789815	0.332801	-0.253819	0.170038	0	0
FOSB	P53539	NEU	0.654949	0.562426	0.0925226	0.944772	0.00862321	0.304337	-0.295714	0.00150931	0	0
TBC1D17	Q9HA65	NEU	1.36441	1.40011	-0.0356984	0.944772	0.692625	1.4023	-0.709675	0.000106082	0	0
GAS6	Q14393	CAR	1.1521	1.19025	-0.0381493	0.945443	0.181068	0.383005	-0.201938	0.185682	0	0
IL2	P60568	INF	0.463678	0.498177	-0.034499	0.947785	0.246508	0.305463	-0.0589556	0.800674	0	0
CD109	Q6YHK3	NEU	1.13437	1.14679	-0.0124132	0.950057	0.626122	0.586384	0.0397385	0.745494	0	0
PTPRS	Q13332	CAR	1.17497	1.20354	-0.0285726	0.950632	0.540048	0.639278	-0.0992295	0.54618	0	0
CTSF	Q9UBX1	ONC	1.0659	1.00516	0.0607375	0.952465	0.118232	0.26045	-0.142218	0.37688	0	0
EDAR	Q9UNE0	INF	2.71487	2.66417	0.0506975	0.952529	1.35749	1.76086	-0.403372	0.158131	0	0
IL2RB	P14784	INF	0.529875	0.520013	0.00986239	0.954304	0.126463	0.191066	-0.0646031	0.625181	0	0
B4GAT1	O43505	NEU	1.43351	1.46541	-0.0318998	0.955308	0.553195	0.872423	-0.319228	0.0391042	0	0
DAPP1	Q9UN19	INF	1.21652	1.1455	0.0710179	0.958852	5.23805	6.41586	-1.17781	0.00552304	0	0
LXN	Q9BS40	NEU	1.31185	1.24909	0.0627563	0.963561	2.52802	3.32079	-0.792776	0.0188907	0	0
GMPR	P36959	INF	1.76126	1.53695	0.224317	0.965816	4.29079	5.18985	-0.899064	7.52375e-05	0	0	0.000206
CCL11	P51671	INF	0.857258	0.912949	-0.0556902	0.965816	-0.0167311	0.235959	-0.25269	0.0248256	0	0
CEACAM5	P06731	ONC	1.02532	1.00433	0.0209924	0.970304	0.209016	0.202288	0.00672867	0.625181	0	0
NGF	P01138	NEU	0.165719	0.161898	0.00382127	0.972666	-0.0394567	0.0191583	-0.0586149	0.450741	0	0
NPPB	P16860	CAR	0.442653	0.395511	0.0471425	0.974997	0.703348	1.21889	-0.515538	0.14134	0	0
CD300LG	Q6UXG3	NEU	1.0348	1.04452	-0.00971577	0.976331	0.501229	0.632944	-0.131716	1	0	0
FETUB	Q9UGM5	CAR	1.25647	1.24331	0.0131586	0.976604	0.765354	0.948425	-0.18307	0.180017	0	0
LIFR	P42702	INF	1.83448	1.829	0.0054711	0.977837	0.978744	1.21435	-0.235609	0.0521524	0	0
OMD	Q99983	INF	0.166745	0.233381	-0.0666355	0.97911	-0.276015	-0.26698	-0.00903531	0.959739	0	0
APOH	P02749	NEU	1.21556	1.23112	-0.0155555	0.981589	0.98886	1.38889	-0.400033	0.00325185	0	0
MB	P02144	CAR	-0.836605	-0.799294	-0.0373109	0.981802	-1.2197	-1.10821	-0.111491	0.816697	0	0
TPT1	P13693	INF	0.69451	0.540486	0.154025	0.986938	0.199219	0.143182	0.0560371	0.42766	0	0
SERPINA9	Q86WD7	ONC	0.582104	0.644536	-0.0624321	0.99192	0.116953	0.18569	-0.0687371	0.568564	0	0
CD6	P30203	INF	1.08021	1.0517	0.0285167	0.992109	0.453045	0.306568	0.146477	0.961703	0	0
CXCL17	Q6UXB2	INF	1.15231	1.18925	-0.0369337	0.992109	1.24354	2.19921	-0.955669	0.0271228	0	0
HSPB6	O14558	ONC	0.94824	0.937913	0.010327	0.994511	-0.511629	-0.0340091	-0.477619	0.101776	0	0
METAP1	P53582	NEU	0.587591	0.622923	-0.0353323	0.996749	0.402811	0.600511	-0.1977	0.035106	0	0
ACVRL1	P37023	NEU	1.60679	1.6067	9.09118e-05	0.996962	0.791383	1.06901	-0.277631	0.281039	0	0
SMARCA2	P51531	NEU	0.77335	0.774047	-0.000696774	1	0.843348	1.16248	-0.319129	0.132628	0	0

## Sheet: Table S2
Supplementary Table S2. Previous literature connections
proteinShortName	Paper Pubmed ID (PMID)	Paper title:
WFDC2	10570965	Comparative hybridization of an array of 21,500 ovarian cDNAs for the discovery of genes overexpressed in ovarian carcinomas
KRT19	30287916	Kallikrein-related peptidases 4, 5, 6 and 7 regulate tumour-associated factors in serous ovarian cancer
FOLR1	23528302	Folate-receptor 1 (FOLR1) protein is elevated in the serum of ovarian cancer patients
DPY30	30221689	DPY30 is required for the enhanced proliferation, motility and epithelial-mesenchymal transition of epithelial ovarian cancer cells
SPINT1	19643405	The molecular signature of endometriosis-associated endometrioid ovarian cancer differs significantly from endometriosis-independent endometrioid ovarian cancer
GRPEL1
MAD1L1	20066894	Identification of genes with differential expression in chemoresistant epithelial ovarian cancer using high-density oligonucleotide microarrays
PRSS8	27036110	The serine protease prostasin (PRSS8) is a potential biomarker for early detection of ovarian cancer
VTCN1	26211593	Effect of VTCN1 on progression and metastasis of ovarian carcinoma in vitro and vivo
MSLN	30134520	The Impact of Mesothelin in the Ovarian Cancer Tumor Microenvironment
CCL7	34206004	CC Chemokine Ligand 7 Derived from Cancer-Stimulated Macrophages Promotes Ovarian Cancer Cell Invasion
PTS
BRK1
KRT18	34070214	Predictive of Tubo-Ovarian High-Grade Serous Carcinoma Prognosis
MUC16	6310399	A radioimmunoassay using a monoclonal antibody to monitor the course of epithelial ovarian cancer
SPP1	29559792	SPP1 promotes ovarian cancer progression via Integrin β1/FAK/AKT signaling pathway
RRM2	22884145	Overexpression of catalytic subunit M2 in patients with ovarian cancer
ZBTB17
MDK	20525245	Evaluation of midkine and anterior gradient 2 in a multimarker panel for the detection of ovarian cancer
CDCP1	26882065	Cell line and patient-derived xenograft models reveal elevated CDCP1 as a target in high-grade serous ovarian cancer
KLK6	27284406	Diagnostic value of KLK6 as an ovarian cancer biomarker: A meta-analysis
PAEP	23036050	Glycodelin A is a prognostic marker to predict poor outcome in advanced stage ovarian cancer patients
SPON1	24294399	Importance of spondin 1 and cellular retinoic acid binding protein 1 in the clinical diagnosis of ovarian cancer
NECTIN4	31137558	NECTIN4 (PVRL4) as Putative Therapeutic Target for a Specific Subtype of High Grade Serous Ovarian Cancer-An Integrative Multi-Omics Approach
KLK10	20686372	Kallikrein-related peptidase 10 (KLK10) expression and single nucleotide polymorphisms in ovarian cancer survival
TREM2	34686340	Targeting TREM2 on tumor-associated macrophages enhances immunotherapy
PSIP1	26840454	Germline polymorphisms in an enhancer of PSIP1 are associated with progression-free survival in epithelial ovarian cancer
TACSTD2	28962108	Overexpression of TROP2 promotes proliferation and invasion of ovarian cancer cells
METAP1D
IL6	32042020	Pre-operative sera interleukin-6 in the diagnosis of high-grade serous ovarian cancer
IFNL1
CXCL9	27490802	CXCL9 and CXCL10 predict survival and are regulated by cyclooxygenase inhibition in advanced serous ovarian cancer

## Sheet: Table S3
Supplementary Table S3. Results from the multivariate modelling.
"Model1_Origin"/"Model2_Origin" - Specifies from where the models comes from, "11p+a" is the 11 biomaker model developed in Enroth et al 2019, "newModel" indicates a model developed in this paper, "clinCA125" is discrimination based on clinucally measured CA125/MUCIN16
"Comparison" defines the type of new model developed. "b_1234" is a model based on univariate significant proteins separating beign from stages 1-4, similar for "b_12", "b_34" and "12_34". The "m1" and "m2" are the non-overlapping models developed using all proteins regardless of univarate performance.
"Model2_Cohort" defines if the performance estimates is calculated using the discovery or replication cohort.
"SE/SP", performance estimates (point estimate) for sensitivity or specificity based on specific cut-offs for the individual models.
"pval" represents statistical difference in the estiamtes performance between Model1 and Model2. DeLong's test for AUC and Fisher's exact test for SE and SP.
Model1_Origin	Model2_origin	Comparison	Model2_Cohort	Model1_AUC	Model2_AUC	pvalAUC	Model1_SE	Model2_SE	pvalSE	Model1_SP	Model2_SP	pvalSP
11p+a	newModel	b_1234	Discovery	0.945	0.976	0.1399	0.849	0.915	0.4229	0.934	0.957	1
11p+a	newModel	b_1234	Replication	0.945	0.996	0.002833	0.849	0.75	0.324	0.934	1	1
11p+a	newModel	b_12	Discovery	0.885	0.962	0.1313	0.84	1	0.2823	0.802	0.917	0.2441
11p+a	newModel	b_12	Replication	0.885	1	0.004958	0.84	1	1	0.802	1	0.1212
11p+a	newModel	b_34	Discovery	0.977	0.958	0.4219	0.877	0.905	0.7611	1	0.963	0.203
11p+a	newModel	b_34	Replication	0.977	0.962	0.6337	0.877	0.722	0.143	1	0.923	0.1092
11p+a	newModel	12_34	Discovery	0.744	0.779	0.7445	0.646	0.977	1.413e-05	0.76	0.6	0.311
11p+a	newModel	12_34	Replication	0.744	0.812	0.6826	0.646	0.812	0.2455	0.76	0.75	1
11p+a	newModel	m1	Discovery	0.945	0.985	0.03771	0.849	0.925	0.273	0.934	0.95	1
11p+a	newModel	m1	Replication	0.945	1	0.0007592	0.849	0.778	0.4875	0.934	1	1
11p+a	newModel	m2	Discovery	0.945	0.94	0.8737	0.849	0.87	1	0.934	0.957	1
11p+a	newModel	m2	Replication	0.945	0.952	0.8478	0.849	0.526	0.003555	0.934	1	1
newModel	newModel	m1 vs m2	Discovery	1	0.94	0.0277	0.778	0.87	0.4481	1	0.957	1
newModel	newModel	m1 vs m2	Replication	1	0.952	0.1642	0.778	0.526	0.1704	1	1	1
clinCA125	newModel	b_1234	Discovery	0.875	0.976	0.0038	0.944	0.915	0.4959	0.455	0.957	3.654e-05
clinCA125	newModel	b_1234	Replication	0.875	0.996	0.0002327	0.944	0.75	0.01753	0.455	1	0.0002716
clinCA125	newModel	b_12	Discovery	0.712	0.962	0.001041	0.762	1	0.1329	0.455	0.917	0.0001809
clinCA125	newModel	b_12	Replication	0.712	1	5.8e-05	0.762	1	1	0.455	1	0.0002716
clinCA125	newModel	b_34	Discovery	0.925	0.958	0.3272	1	0.905	0.01939	0.455	0.963	6.587e-06
clinCA125	newModel	b_34	Replication	0.925	0.962	0.3596	1	0.722	0.000246	0.455	0.923	0.003421
clinCA125	newModel	12_34	Discovery	0.819	0.779	0.6959	1	0.977	0.3929	0.238	0.6	0.04103
clinCA125	newModel	12_34	Replication	0.819	0.812	0.9686	1	0.812	0.005877	0.238	0.75	0.08079
clinCA125	newModel	m1	Discovery	0.875	0.985	0.001187	0.944	0.925	0.7026	0.455	0.95	0.0001004
clinCA125	newModel	m1	Replication	0.875	1	0.0001239	0.944	0.778	0.04188	0.455	1	0.001237
clinCA125	newModel	m2	Discovery	0.875	0.94	0.1206	0.944	0.87	0.1842	0.455	0.957	3.654e-05
clinCA125	newModel	m2	Replication	0.875	0.952	0.1	0.944	0.526	2.912e-05	0.455	1	0.0005523
